# Supplementary material for: Cyclisation reactions of N-cinnamoyl-9-aminoanthracenes
Source: Royal Society of Chemistry journal article supplement (doi:10.1039/c4ob00411f), 2014-01-01

## Supporting Information A

### Cyclisation reactions of *N*-cinnamoyl-9-aminoanthracenes

*Frank D. King, Abil Aliev, Stephen Caddick, Derek Tocher*

Department of Chemistry, University College London, 20 Gordon Street, London WC1H 0AJ, UK

E-mail: [f.d.king@ucl.ac.uk](mailto:f.d.king@ucl.ac.uk)

#### Table of Contents

|                                                                 |     |
|-----------------------------------------------------------------|-----|
| <sup>1</sup> H-NMR and <sup>13</sup> C-NMR spectra of <b>3a</b> | S2  |
| <sup>1</sup> H-NMR and <sup>13</sup> C-NMR spectra of <b>3b</b> | S3  |
| <sup>1</sup> H-NMR and <sup>13</sup> C-NMR spectra of <b>3c</b> | S4  |
| <sup>1</sup> H-NMR and <sup>13</sup> C-NMR spectra of <b>3d</b> | S5  |
| NOESY spectrum of <b>3d</b>                                     | S6  |
| <sup>1</sup> H-NMR and <sup>13</sup> C-NMR spectra of <b>3e</b> | S7  |
| <sup>1</sup> H-NMR and <sup>13</sup> C-NMR spectra of <b>3f</b> | S8  |
| <sup>1</sup> H-NMR and <sup>13</sup> C-NMR spectra of <b>3g</b> | S9  |
| <sup>1</sup> H-NMR and <sup>13</sup> C-NMR spectra of <b>3h</b> | S10 |
| <sup>1</sup> H-NMR and <sup>13</sup> C-NMR spectra of <b>3i</b> | S11 |
| <sup>1</sup> H-NMR and <sup>13</sup> C-NMR spectra of <b>3j</b> | S12 |
| <sup>1</sup> H-NMR and <sup>13</sup> C-NMR spectra of <b>3k</b> | S13 |
| <sup>1</sup> H-NMR and <sup>13</sup> C-NMR spectra of <b>3l</b> | S14 |
| <sup>1</sup> H-NMR and <sup>13</sup> C-NMR spectra of <b>3m</b> | S15 |
| <sup>1</sup> H-NMR and <sup>13</sup> C-NMR spectra of <b>3n</b> | S16 |
| <sup>1</sup> H-NMR and <sup>13</sup> C-NMR spectra of <b>4a</b> | S18 |
| HMBC and HSQC spectra of <b>4a</b>                              | S19 |
| <sup>1</sup> H-NMR and <sup>13</sup> C-NMR spectra of <b>4b</b> | S20 |
| <sup>1</sup> H-NMR and <sup>13</sup> C-NMR spectra of <b>4c</b> | S21 |
| <sup>1</sup> H-NMR and <sup>13</sup> C-NMR spectra of <b>4d</b> | S22 |
| <sup>1</sup> H-NMR and <sup>13</sup> C-NMR spectra of <b>4e</b> | S23 |
| <sup>1</sup> H-NMR and <sup>13</sup> C-NMR spectra of <b>4f</b> | S24 |
| <sup>1</sup> H-NMR and <sup>13</sup> C-NMR spectra of <b>4g</b> | S25 |
| <sup>1</sup> H-NMR and <sup>13</sup> C-NMR spectra of <b>4h</b> | S26 |
| <sup>1</sup> H-NMR and <sup>13</sup> C-NMR spectra of <b>4k</b> | S28 |
| <sup>1</sup> H-NMR and <sup>13</sup> C-NMR spectra of <b>4l</b> | S29 |
| <sup>1</sup> H-NMR and <sup>13</sup> C-NMR spectra of <b>4m</b> | S30 |
| <sup>1</sup> H-NMR and <sup>13</sup> C-NMR spectra of <b>4n</b> | S31 |
| <sup>1</sup> H-NMR and <sup>13</sup> C-NMR spectra of <b>7</b>  | S32 |
| <sup>1</sup> H-NMR and <sup>13</sup> C-NMR spectra of <b>8</b>  | S33 |
| <sup>1</sup> H-NMR and <sup>13</sup> C-NMR spectra of <b>9</b>  | S34 |
| <sup>1</sup> H-NMR and <sup>13</sup> C-NMR spectra of <b>10</b> | S35 |
| <sup>1</sup> H-NMR and <sup>13</sup> C-NMR spectra of <b>11</b> | S36 |

$^1\text{H-NMR}$  (600 MHz,  $\text{d}^6\text{-DMSO}$ ) spectrum of *N*-cinnamoyl-9-aminoanthracene **3a**

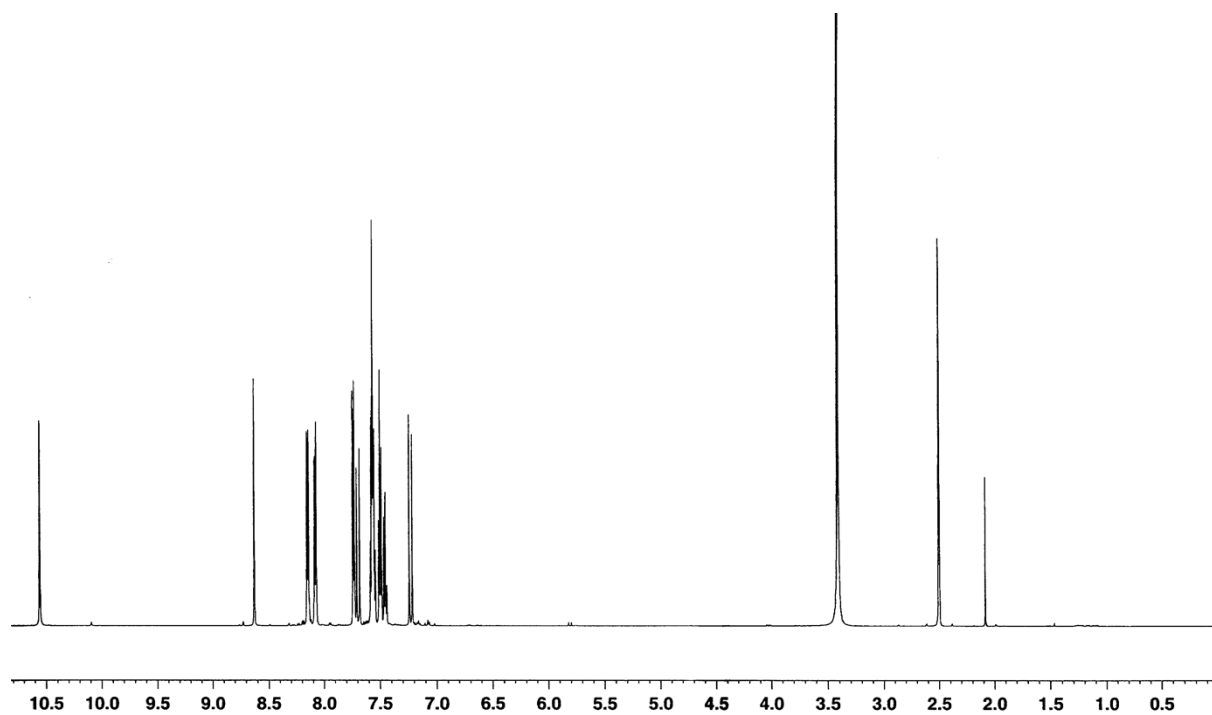

$^{13}\text{C-NMR}$  (150 MHz,  $\text{d}^6\text{-DMSO}$ ) spectrum of *N*-cinnamoyl-9-aminoanthracene **3a**

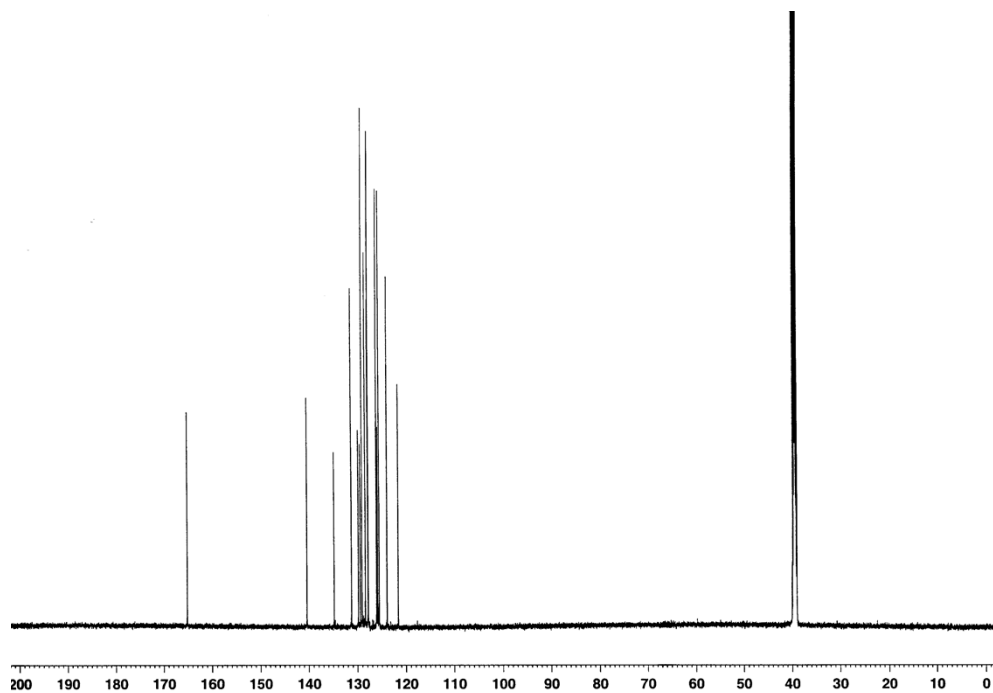

$^1\text{H-NMR}$  spectrum (500 MHz,  $\text{CDCl}_3$ ) of *N*-Methyl-*N*-cinnamoyl-9-aminoanthracene **3b**

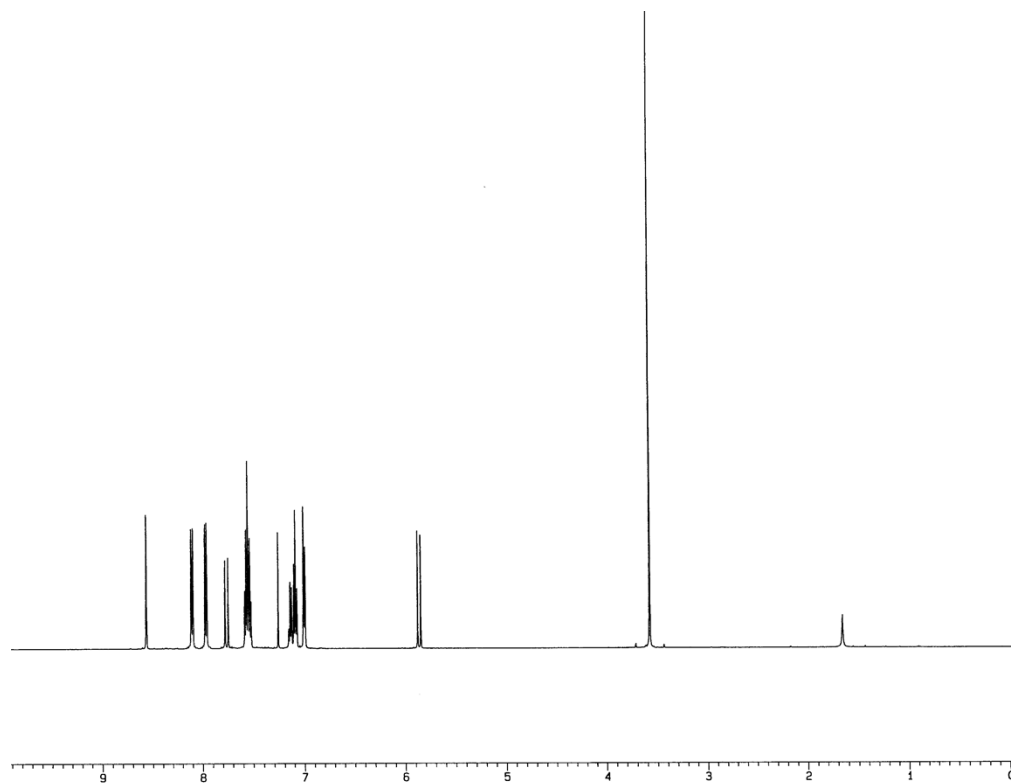

$^{13}\text{C-NMR}$  spectrum (125 MHz,  $\text{CDCl}_3$ ) of *N*-Methyl-*N*-cinnamoyl-9-aminoanthracene **3b**

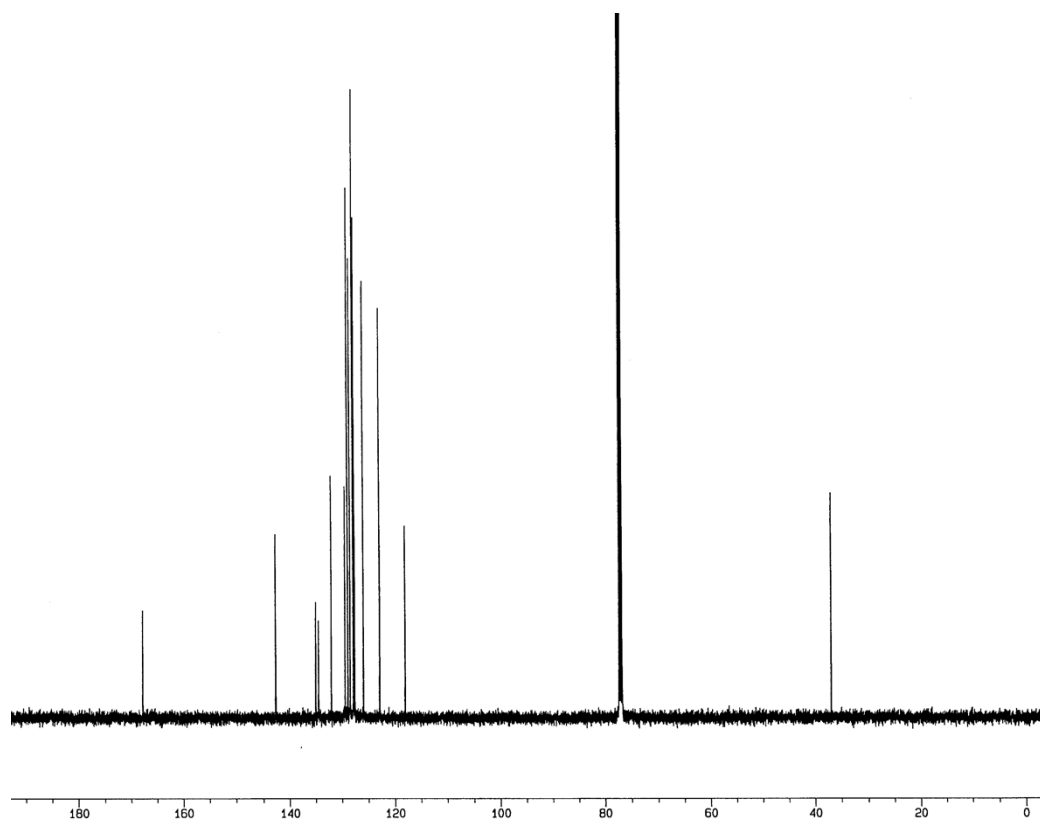

$^1\text{H-NMR}$  spectrum of *N*-Ethyl-*N*-cinnamoyl-9-aminoanthracene **3c**

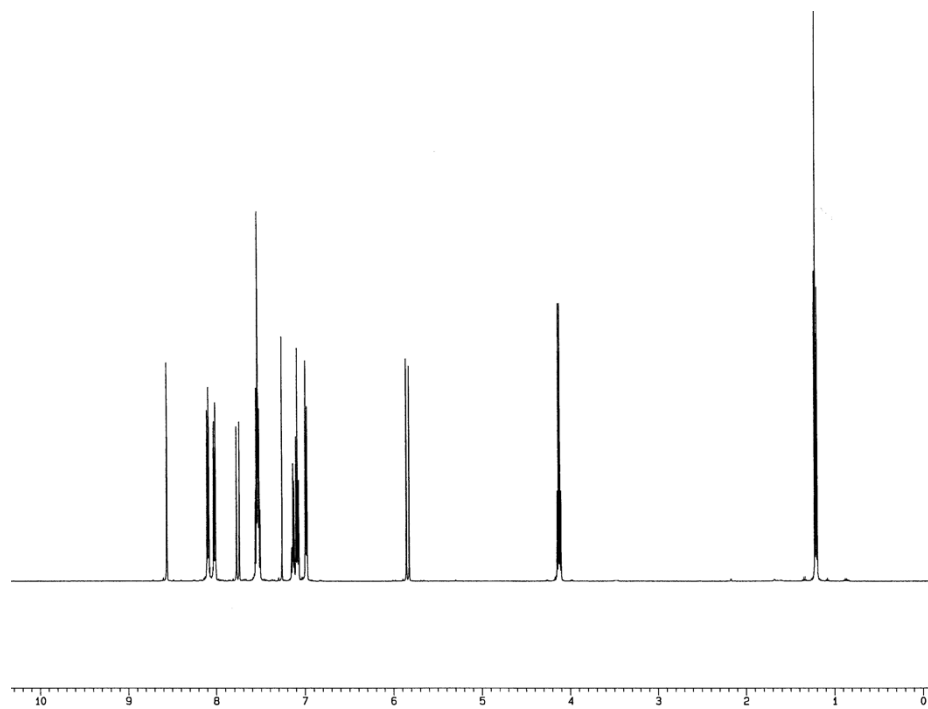

$^{13}\text{C-NMR}$  spectrum of *N*-Ethyl-*N*-cinnamoyl-9-aminoanthracene **3c**

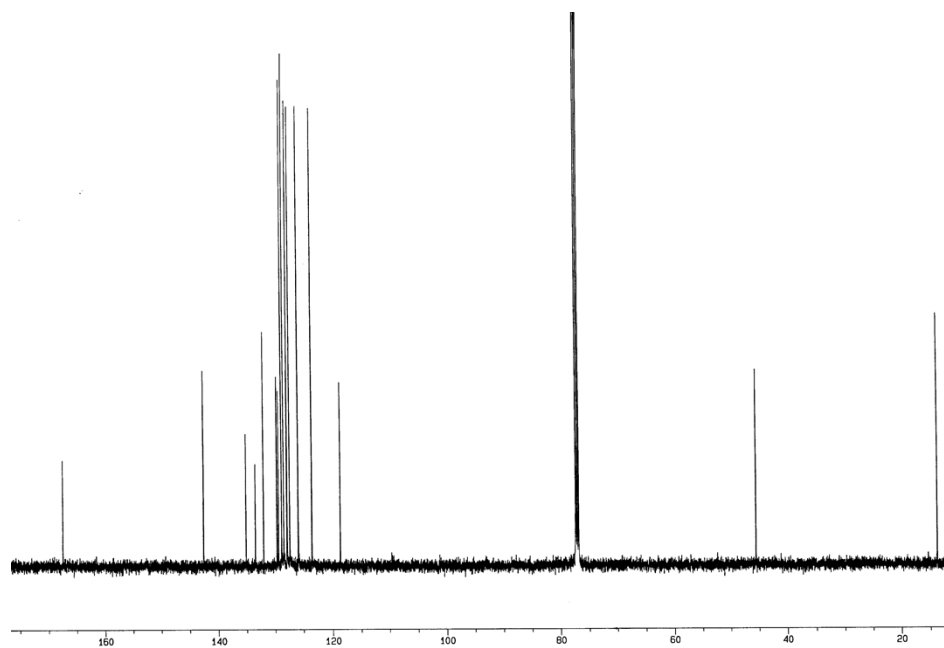

$^1\text{H-NMR}$  (600 MHz,  $\text{CDCl}_3$ ) spectrum of *N*-Benzyl-*N*-cinnamoyl-9-aminoanthracene **3d**

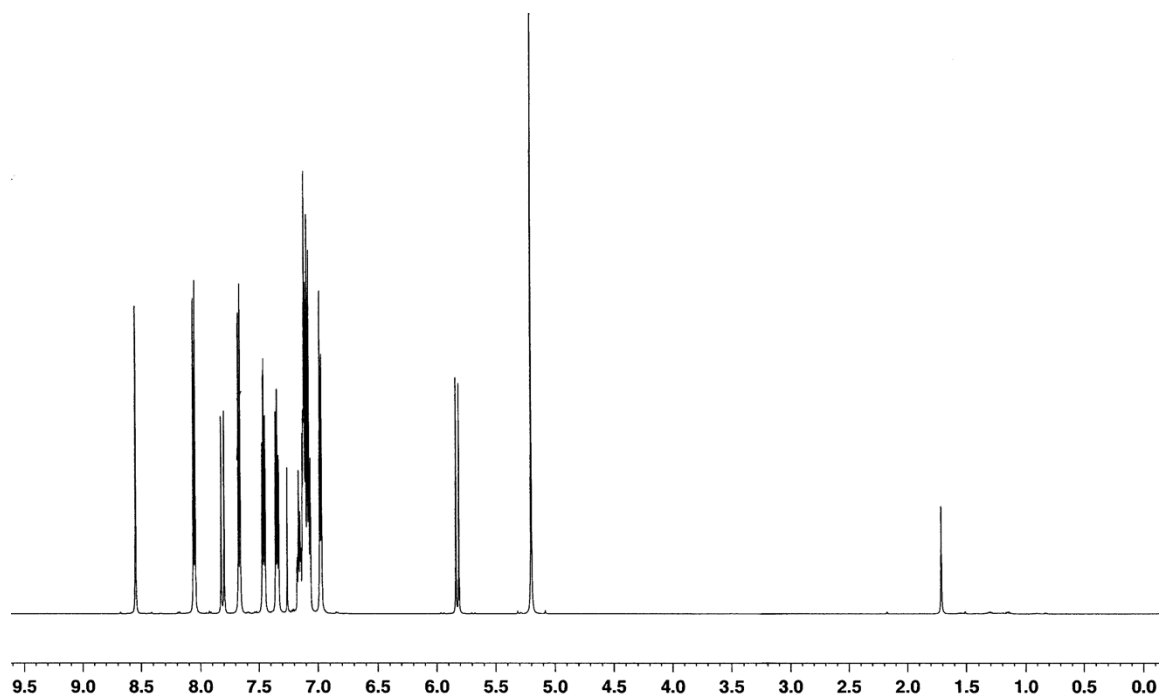

$^{13}\text{C-NMR}$  (150 MHz,  $\text{CDCl}_3$ ) spectrum of *N*-Benzyl-*N*-cinnamoyl-9-aminoanthracene **3d**

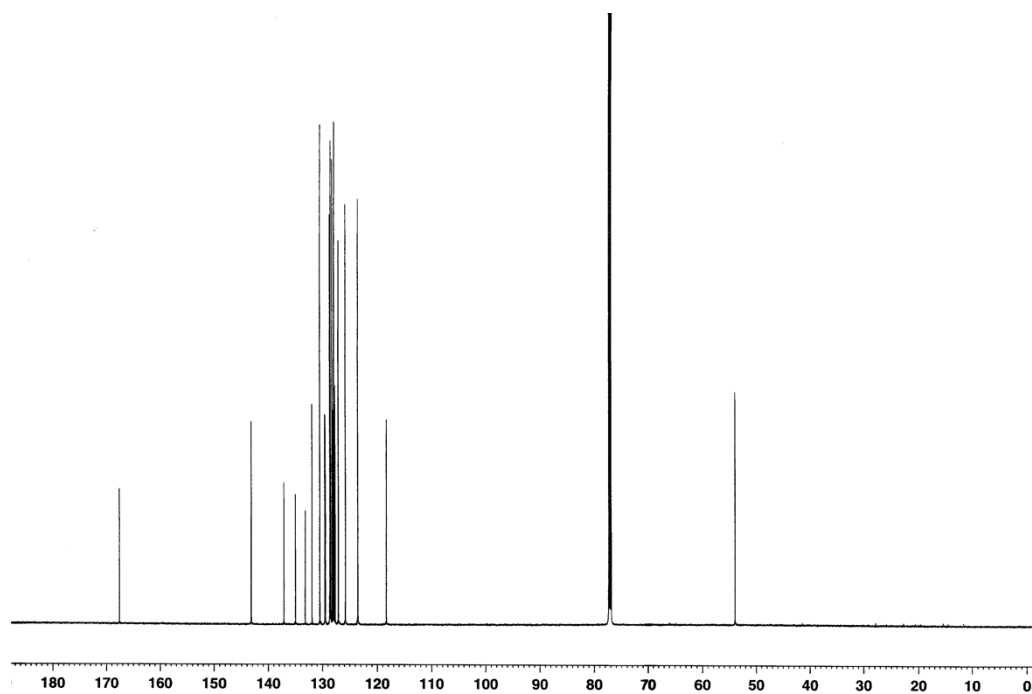

NOESY (600 MHz) spectrum of *N*-Benzyl-*N*-cinnamoyl-9-aminoanthracene **3d**

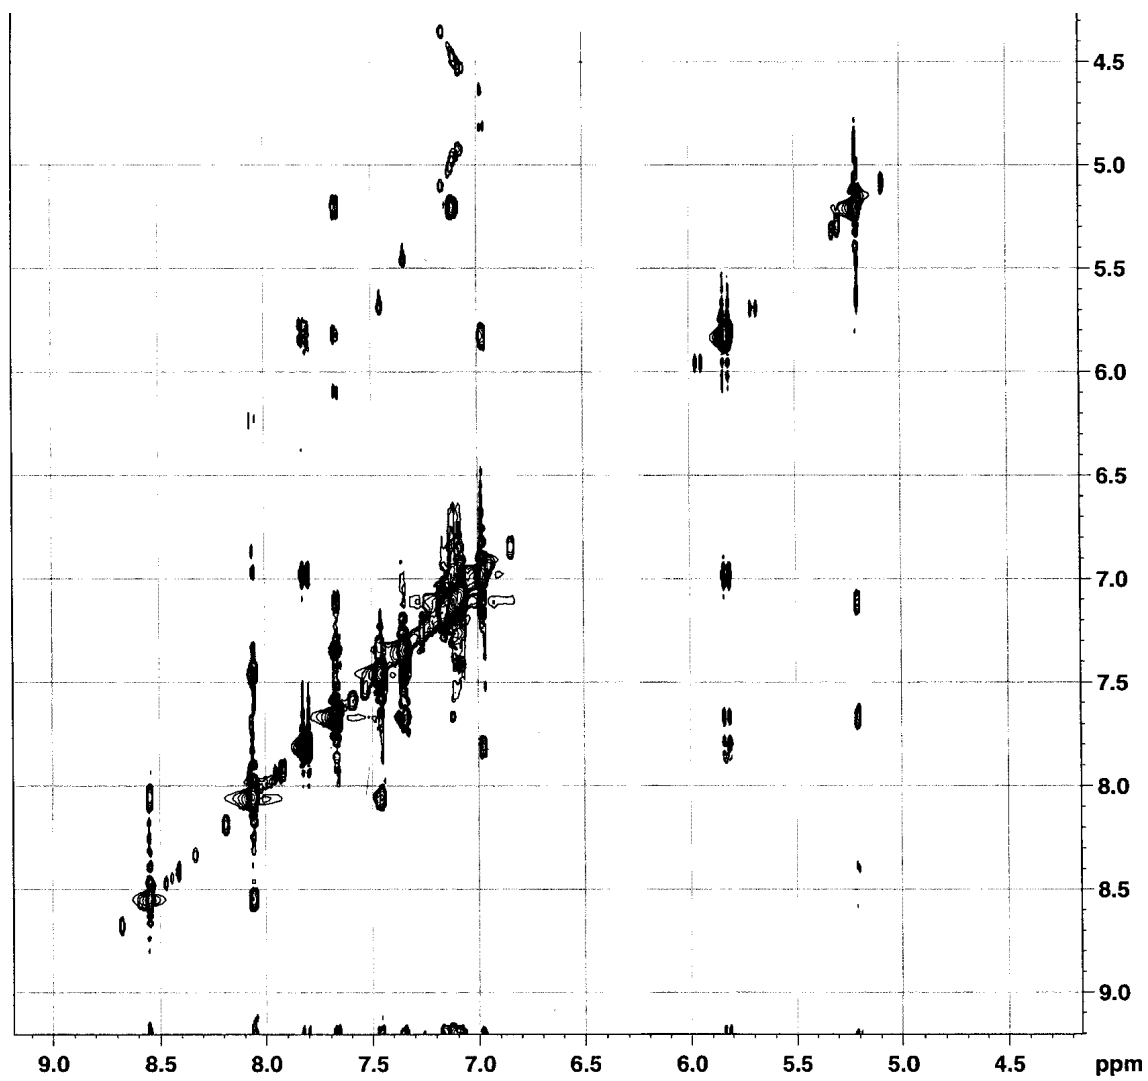

$^1\text{H-NMR}$  spectrum (600 MHz,  $\text{d}^6\text{-DMSO}$ ) of *N*-(4-methylcinnamoyl)-9-aminoanthracene **3e**

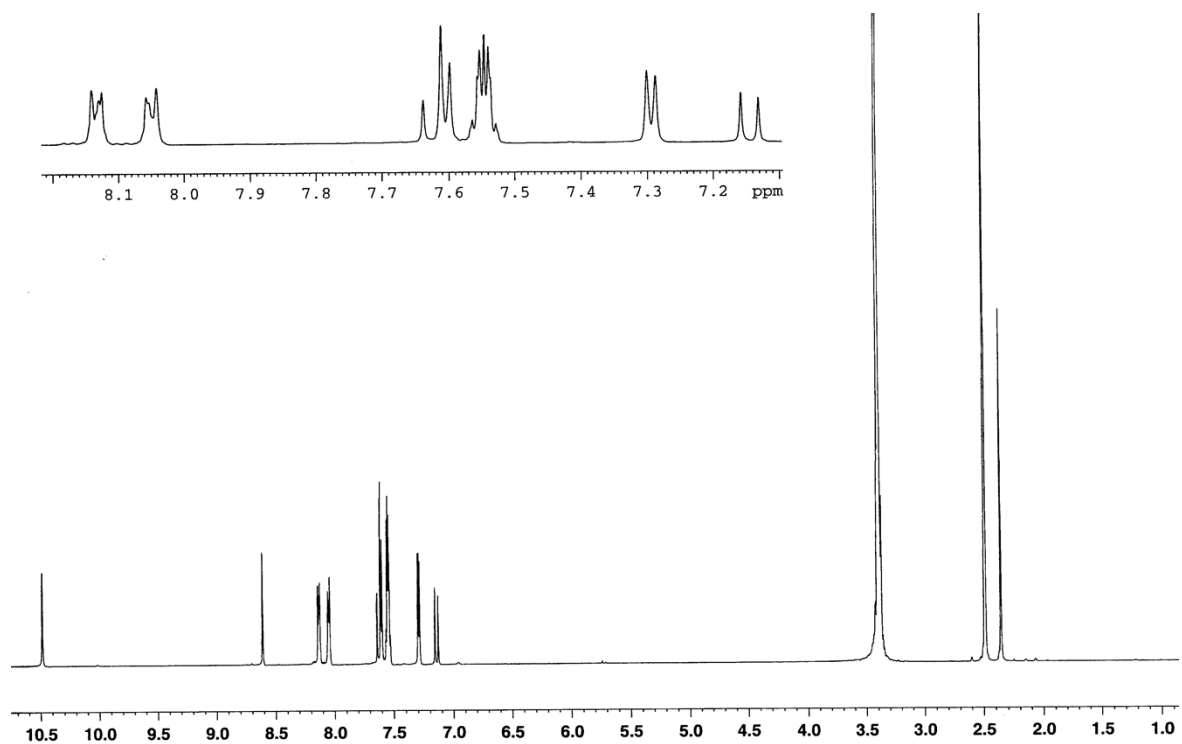

$^{13}\text{C-NMR}$  spectrum of *N*-(4-methylcinnamoyl)-9-aminoanthracene **3e**

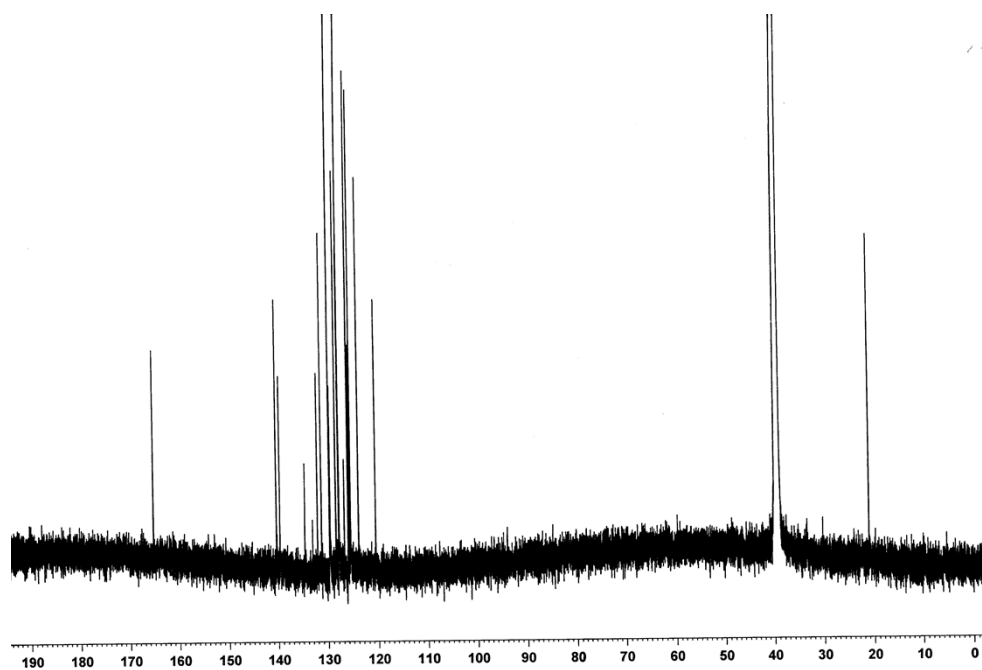

$^1\text{H-NMR}$  spectrum (600 MHz,  $\text{CDCl}_3$ ) of *N*-benzyl-*N*-(4-methylcinnamoyl)-9-aminoanthracene **3f**

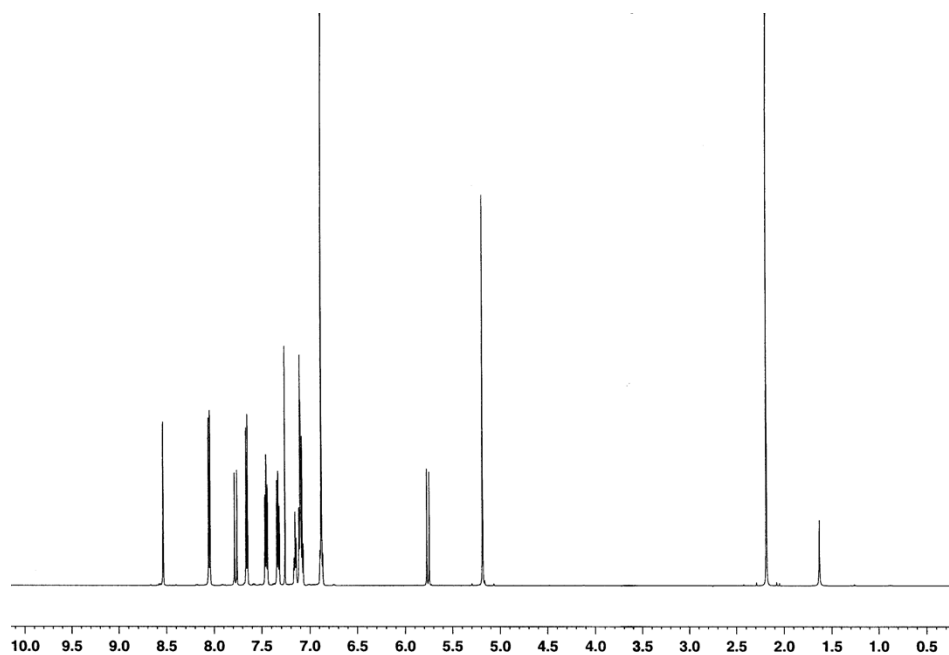

$^{13}\text{C-NMR}$  spectrum (150 MHz,  $\text{CDCl}_3$ ) of *N*-benzyl-*N*-(4-methylcinnamoyl)-9-aminoanthracene **3f**

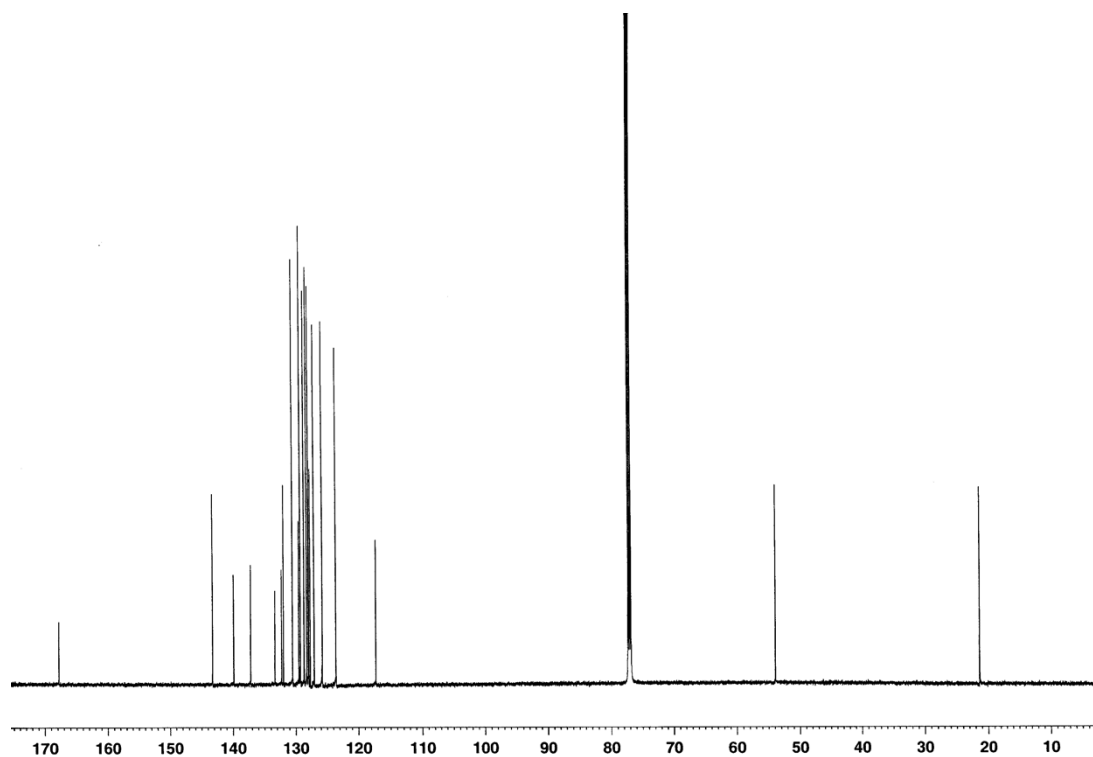



$^1\text{H}$ -NMR spectrum (600 MHz,  $\text{DMSO-d}_6$ ) of *N*-(4-chlorocinnamoyl)-9-aminoanthracene **3g**

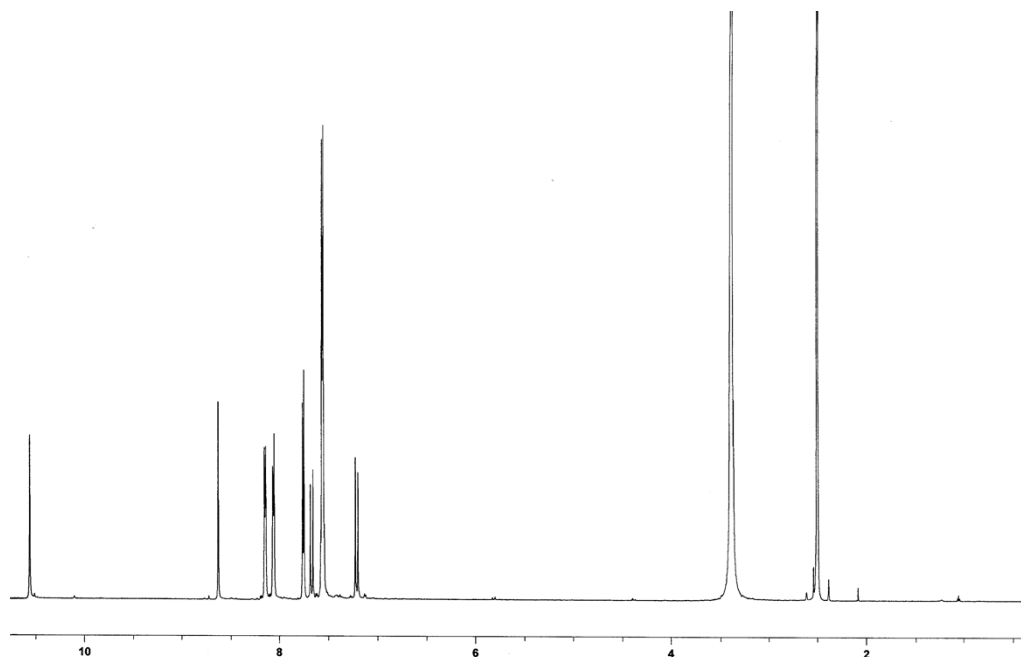

$^{13}\text{C}$ -NMR spectrum (150 MHz,  $\text{DMSO-d}_6$ ) of *N*-(4-chlorocinnamoyl)-9-aminoanthracene **3g**

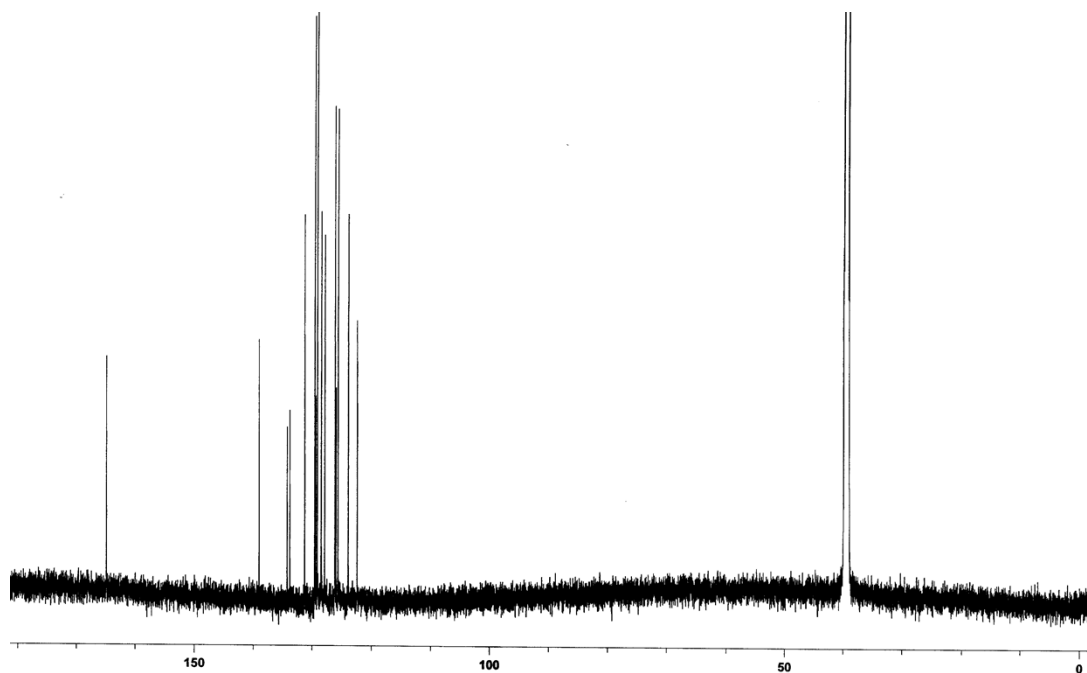

$^1\text{H-NMR}$  spectrum of *N*-benzyl-*N*-(4-chlorocinnamoyl)-9-aminoanthracene **3h**

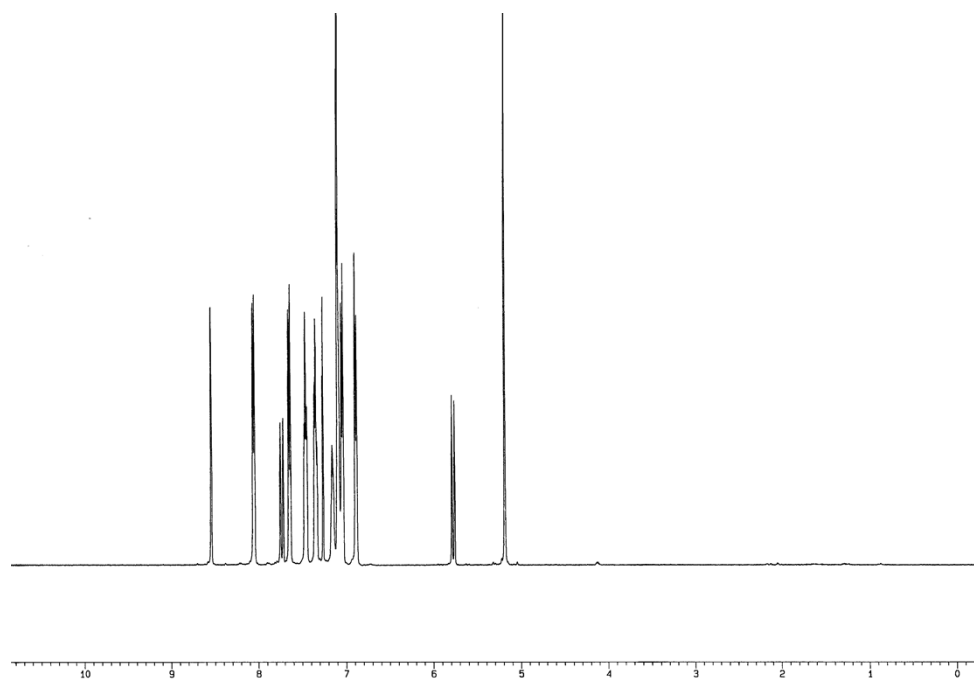

$^{13}\text{C-NMR}$  spectrum of *N*-benzyl-*N*-(4-chlorocinnamoyl)-9-aminoanthracene **3h**

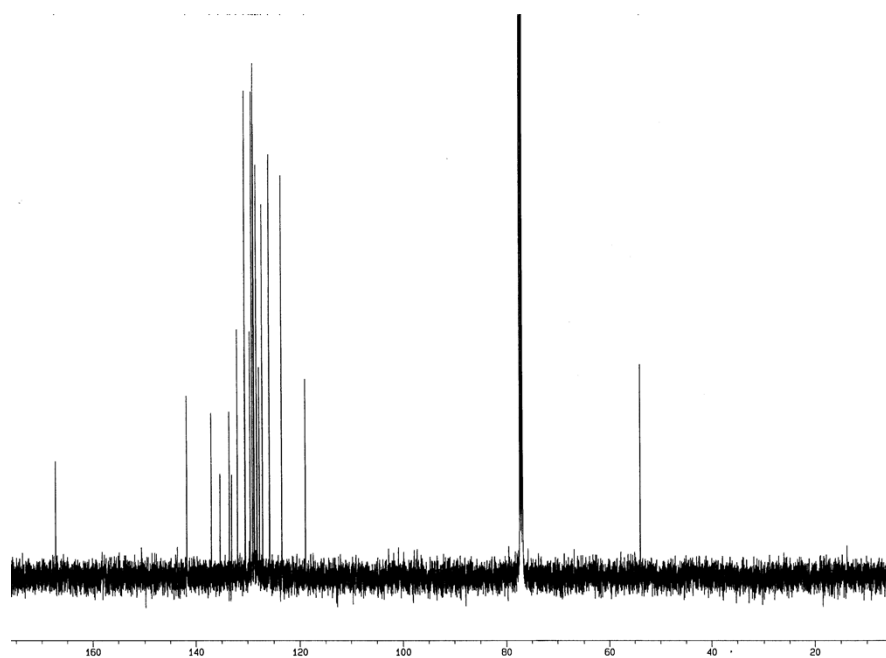

$^1\text{H-NMR}$  spectrum (600 MHz,  $\text{DMSO-d}_6$ ) of *N*-(4-trifluoromethylcinnamoyl)-9-aminoanthracene **3i**

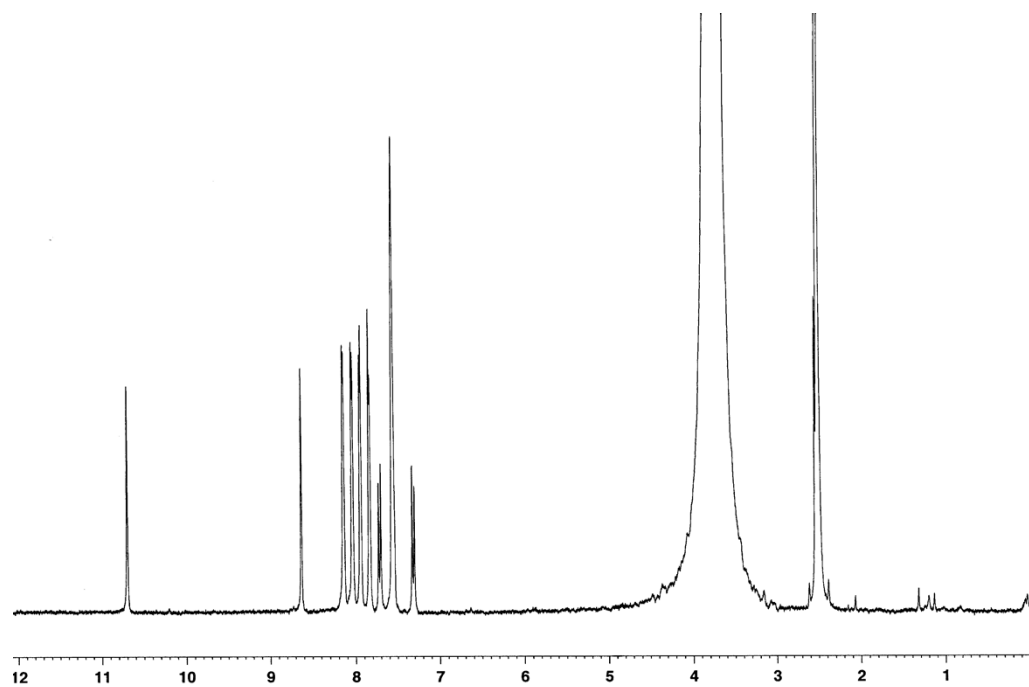

$^{13}\text{C-NMR}$  spectrum (150 MHz,  $\text{DMSO-d}_6$ ) of *N*-(4-trifluoromethylcinnamoyl)-9-aminoanthracene **3i**

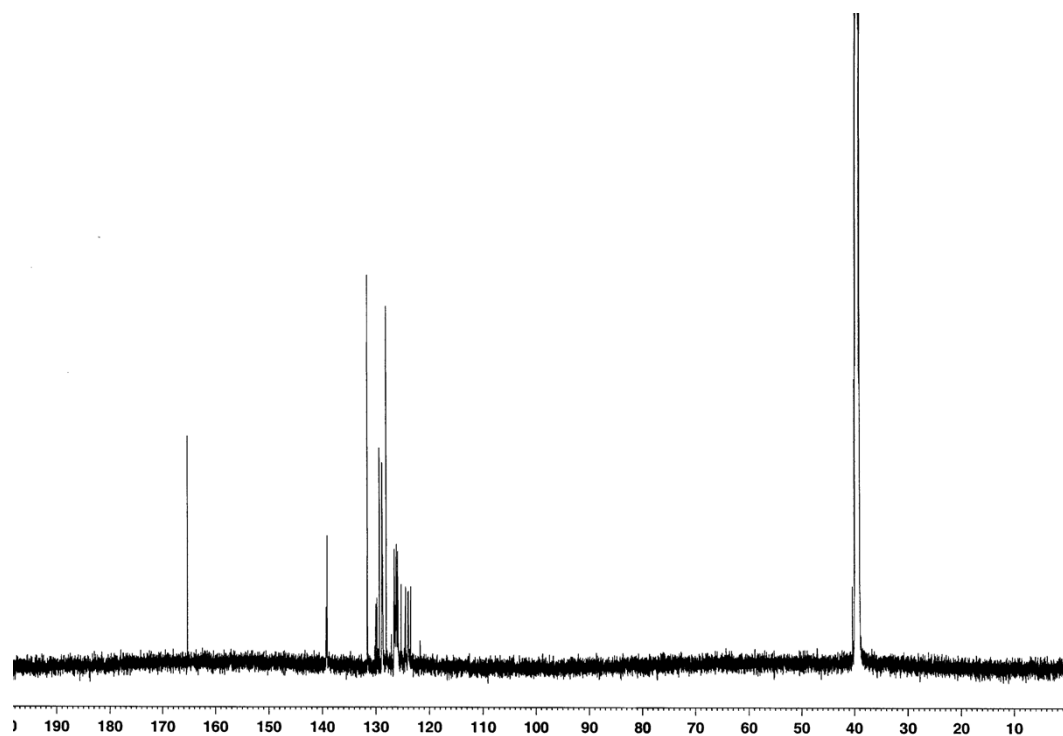

$^1\text{H}$ -NMR spectrum (500 MHz,  $\text{CDCl}_3$ ) of *N*-benzyl-*N*-(4-trifluoromethylcinnamoyl)-9-aminoanthracene **3j**

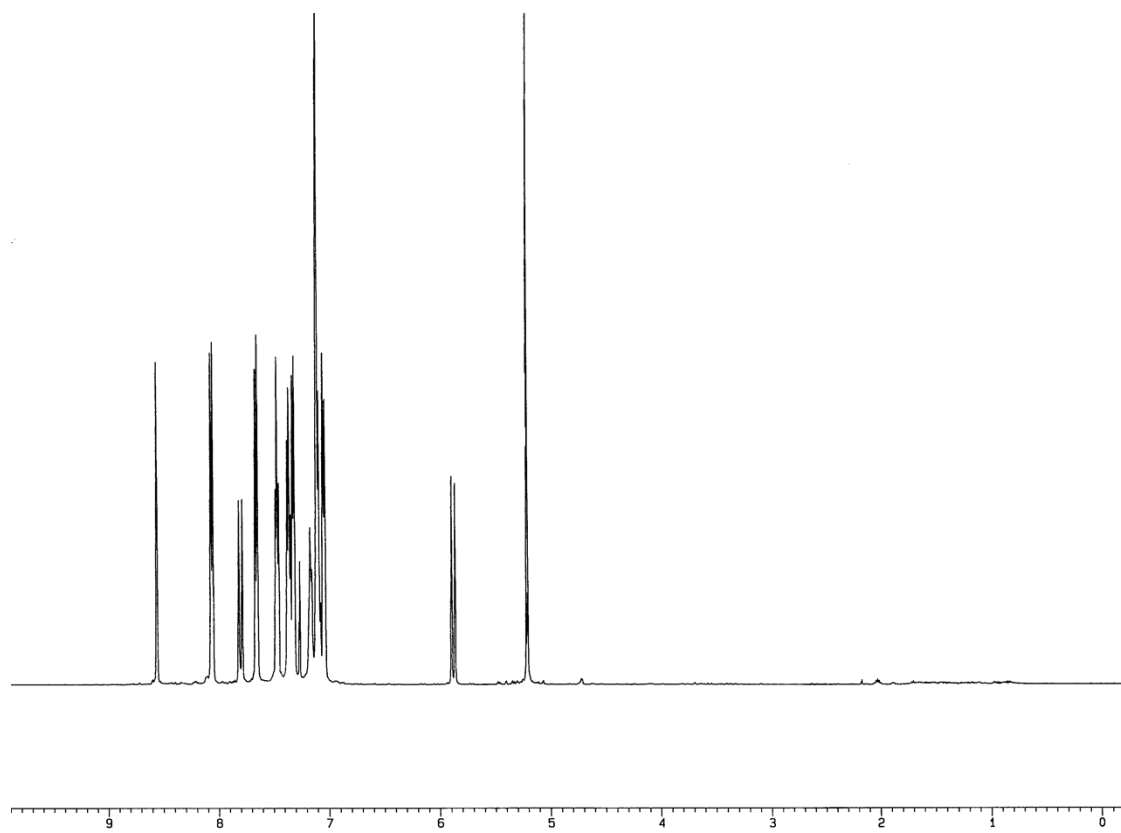

$^{13}\text{C}$ -NMR spectrum (125 MHz,  $\text{CDCl}_3$ ) of *N*-benzyl-*N*-(4-trifluoromethylcinnamoyl)-9-aminoanthracene **3j**

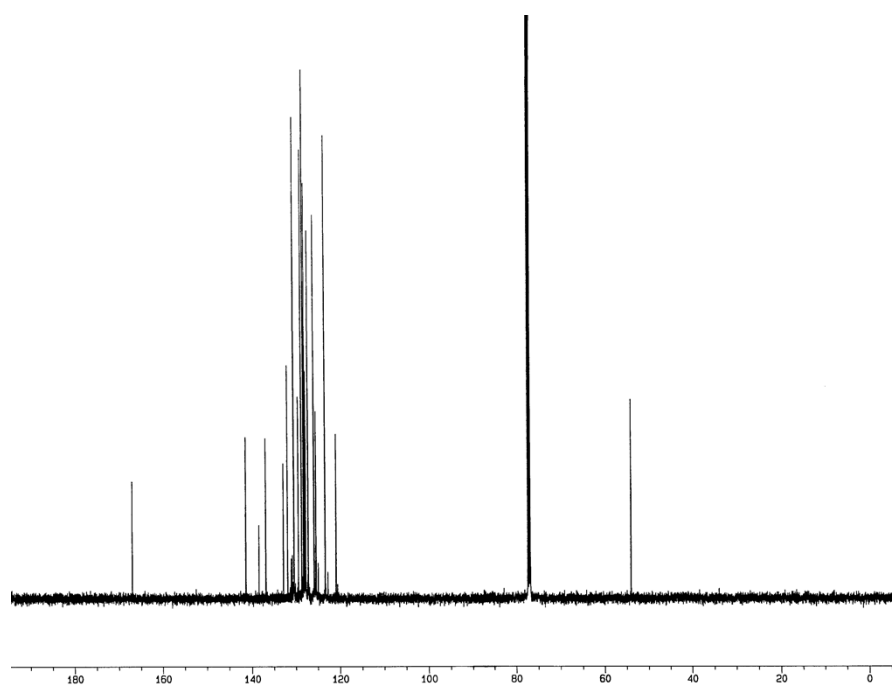

$^1\text{H-NMR}$  spectrum (600 MHz,  $\text{DMSO-d}_6$ ) of *N*-(4-methoxycinnamoyl)-9-aminoanthracene **3k**

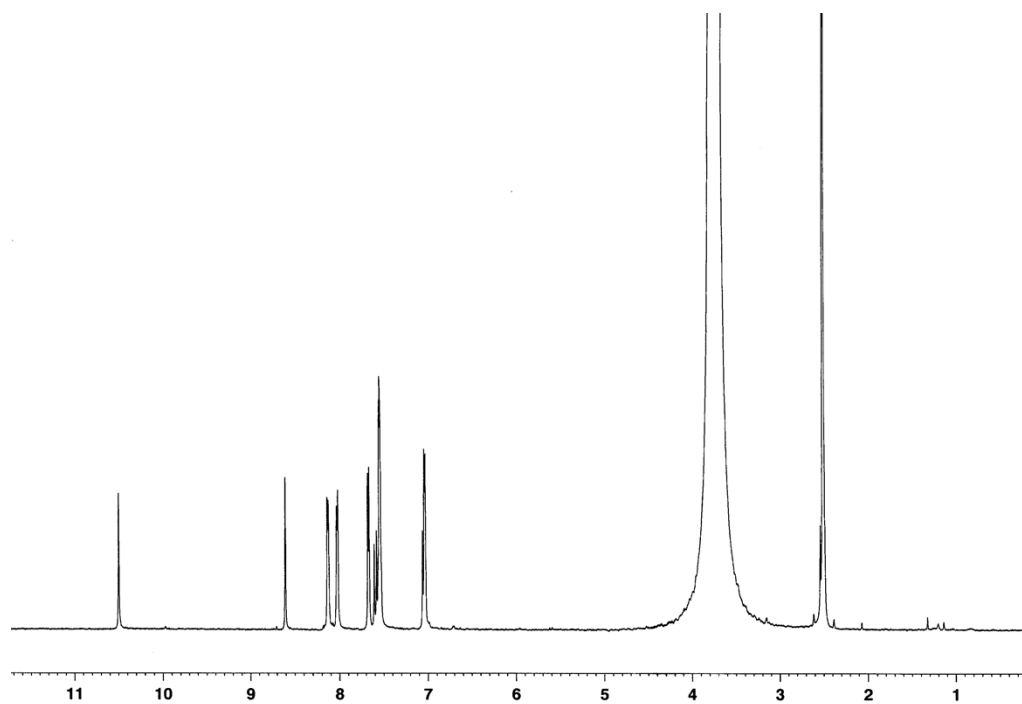

$^{13}\text{C-NMR}$  spectrum (150 MHz,  $\text{DMSO-d}_6$ ) of *N*-(4-methoxycinnamoyl)-9-aminoanthracene **3k**

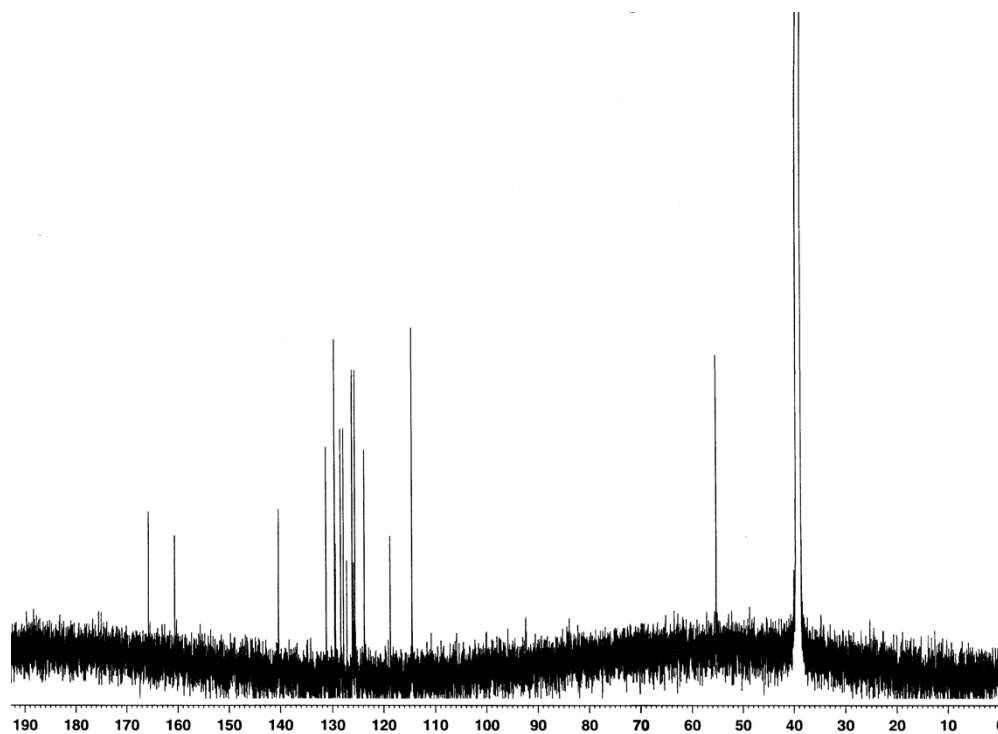

$^1\text{H-NMR}$  spectrum (500 MHz,  $\text{CDCl}_3$ ) of *N*-Benzyl-*N*-(4-methoxycinnamoyl)-9-aminoanthracene **31**

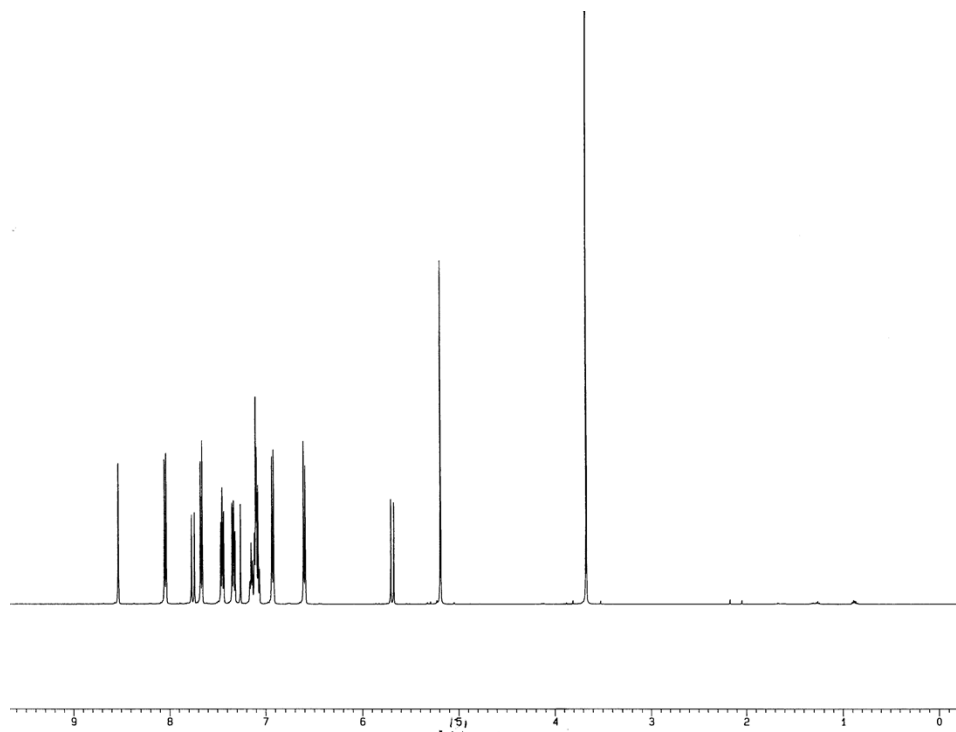

$^{13}\text{C-NMR}$  spectrum (125 MHz,  $\text{CDCl}_3$ ) of *N*-Benzyl-*N*-(4-methoxycinnamoyl)-9-aminoanthracene **31**

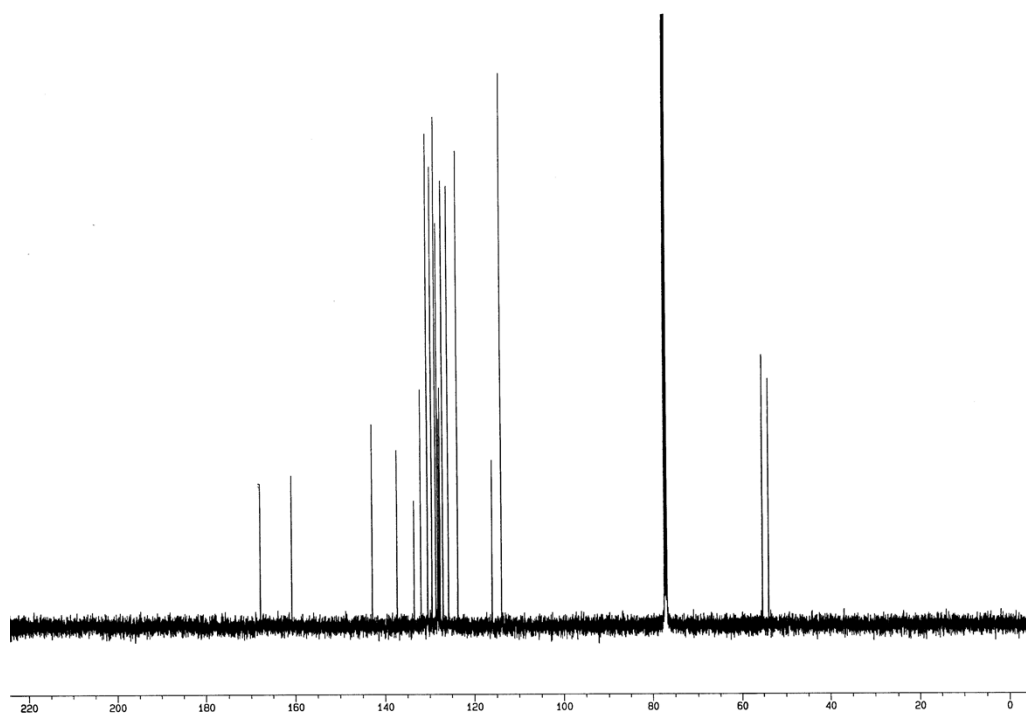

$^1\text{H}$ -NMR spectrum (600 MHz,  $\text{d}^6$ -DMSO) of *N*-(3 methylcinnamoyl)-9-aminoanthracene **3m**

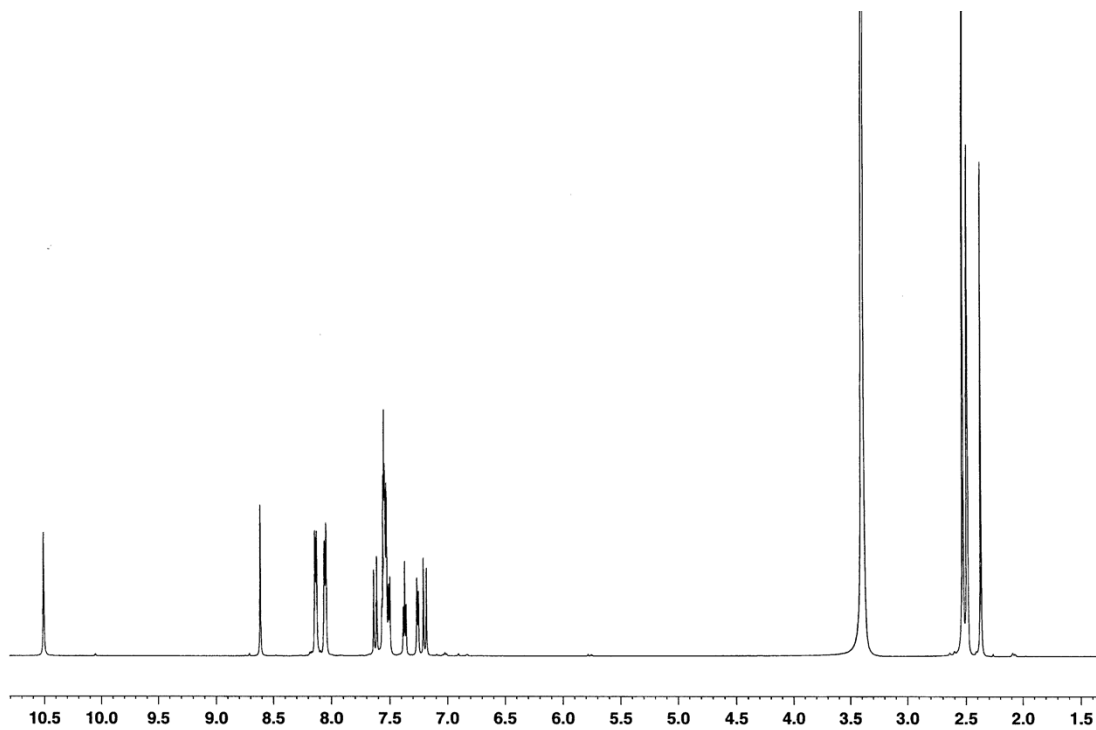

$^{13}\text{C}$ -NMR spectrum (150 MHz,  $\text{d}^6$ -DMSO) of *N*-(3 methylcinnamoyl)-9-aminoanthracene **3m**

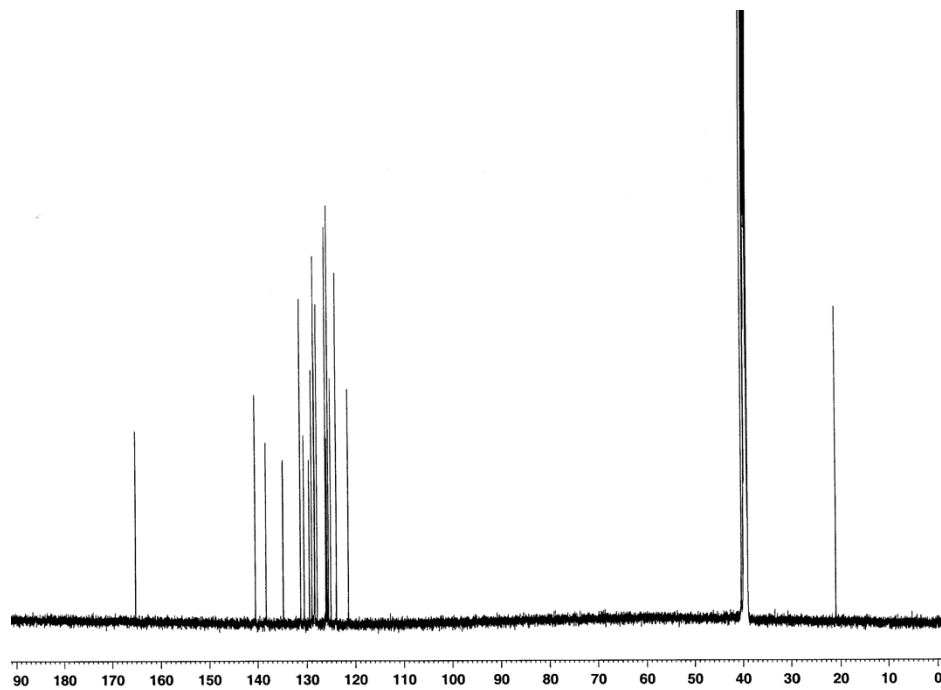

$^1\text{H-NMR}$  spectrum (600 MHz,  $\text{CDCl}_3$ ) of *N*-benzyl-*N*-(3-methylcinnamoyl)-9-aminoanthracene **3n**

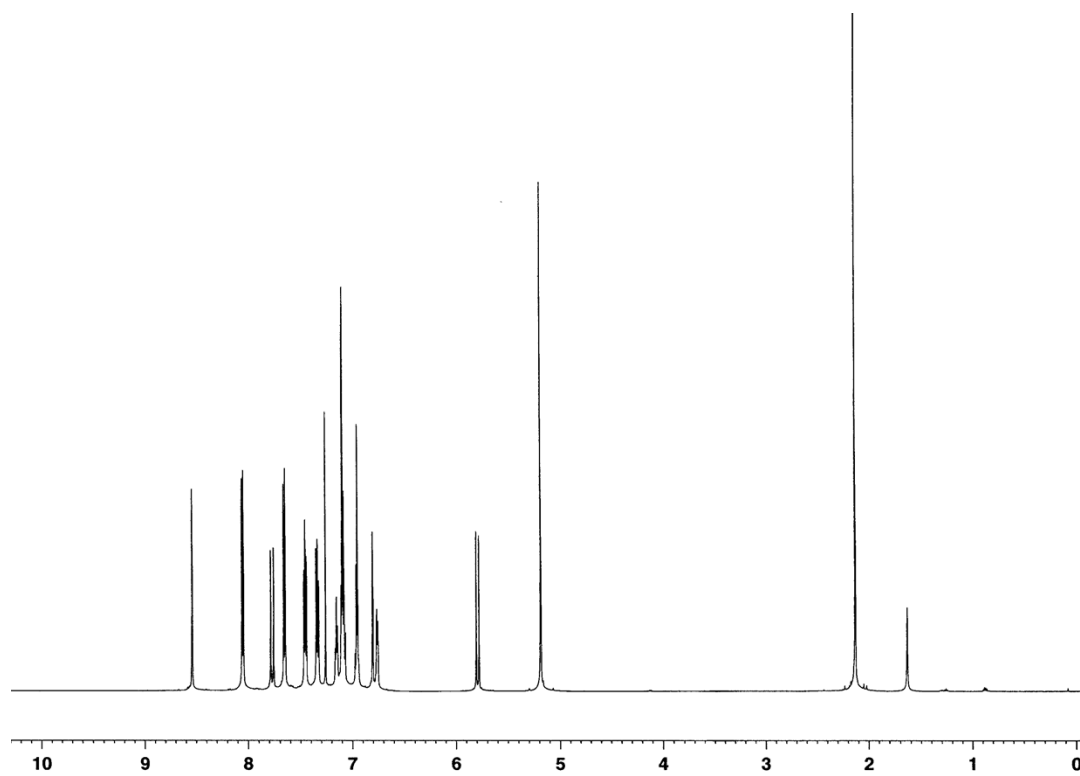

$^{13}\text{C-NMR}$  spectrum (150 MHz,  $\text{CDCl}_3$ ) of *N*-benzyl-*N*-(3-methylcinnamoyl)-9-aminoanthracene **3n**

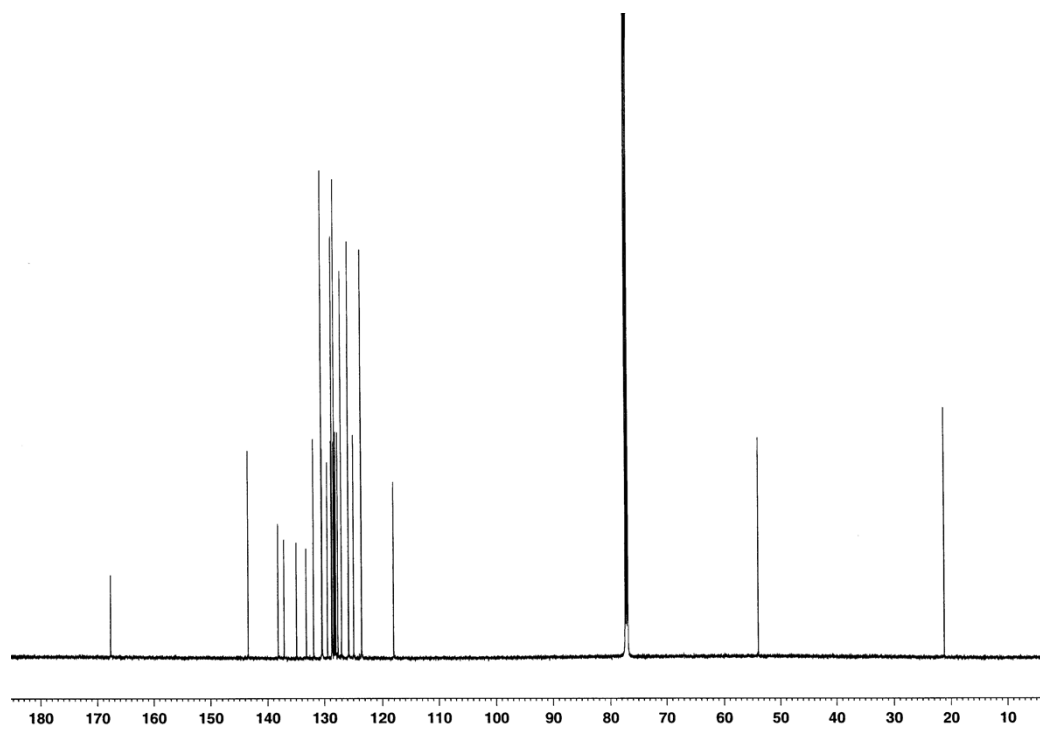



$^1\text{H}$ -NMR spectrum (500MHz,  $\text{CDCl}_3$ ) of ( $\pm$ ) 2-azahexacyclo[10.6.6.0<sup>1,5</sup>.0<sup>6,11</sup>.0<sup>13,18</sup>.0<sup>19,24</sup>]tetracos-6(11),7,9,13,15,17,19(24),20,22-nonaen-3-one **4a**

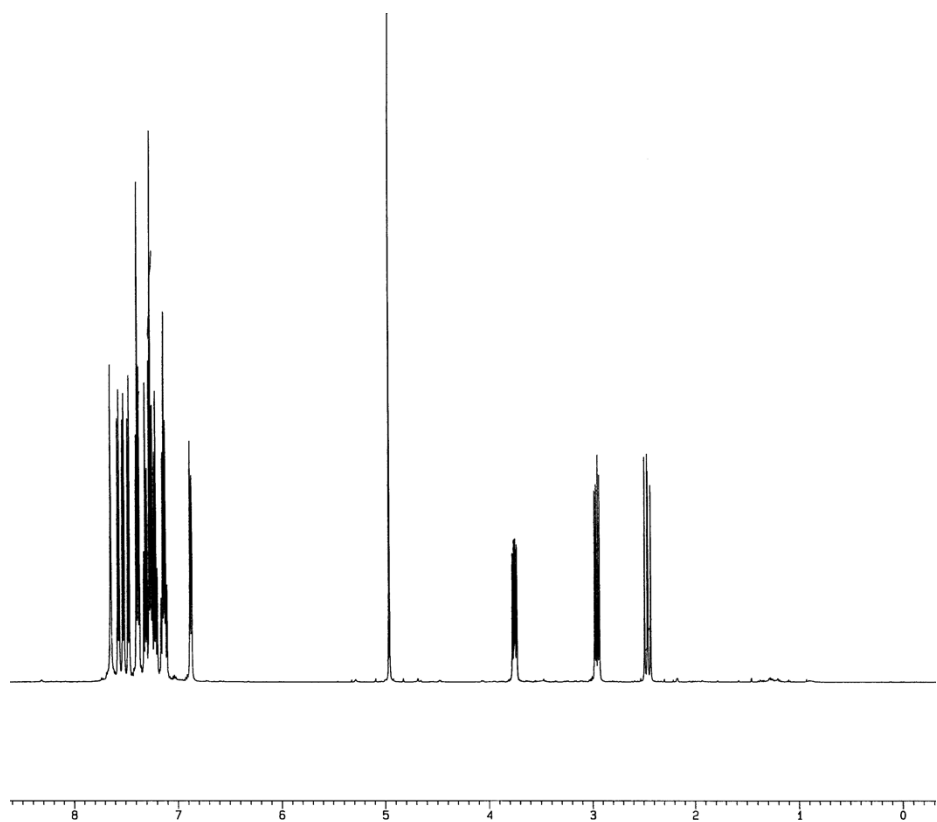

$^{13}\text{C}$ -NMR spectrum (125MHz,  $\text{CDCl}_3$ ) of ( $\pm$ ) 2-azahexacyclo[10.6.6.0<sup>1,5</sup>.0<sup>6,11</sup>.0<sup>13,18</sup>.0<sup>19,24</sup>]tetracos-6(11),7,9,13,15,17,19(24),20,22-nonaen-3-one **4a**

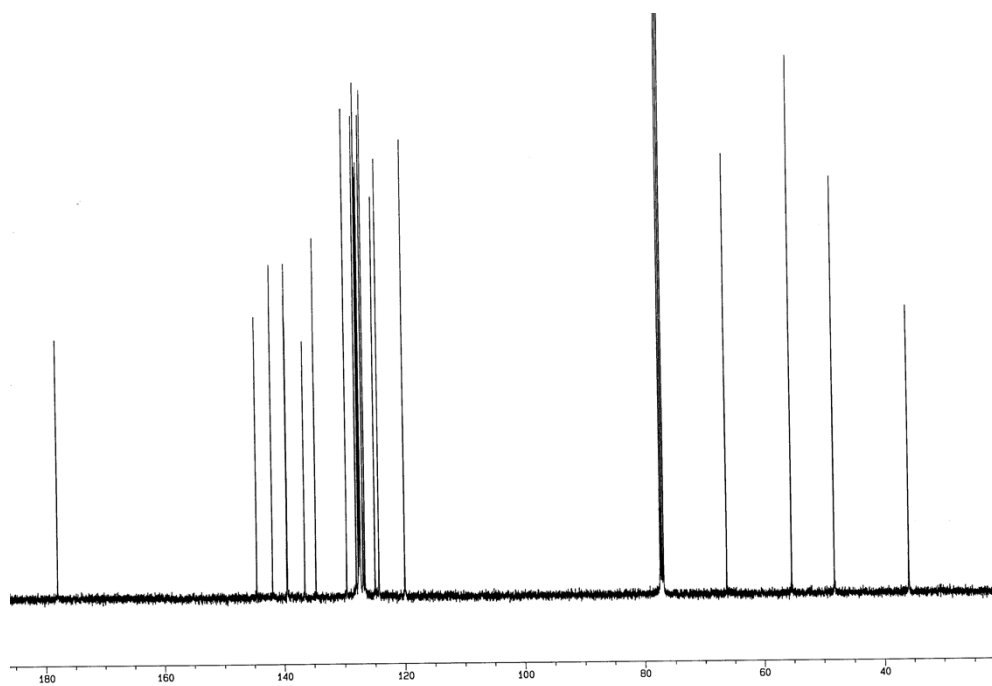

HMBC NMR spectrum (600MHz, CDCl<sub>3</sub>) of (±) 2-azahexacyclo[10.6.6.0<sup>1,5</sup>.0<sup>6,11</sup>.0<sup>13,18</sup>.0<sup>19,24</sup>] tetracos- 6(11),7,9,13,15,17,19(24),20,22-nonaen-3-one **4a**

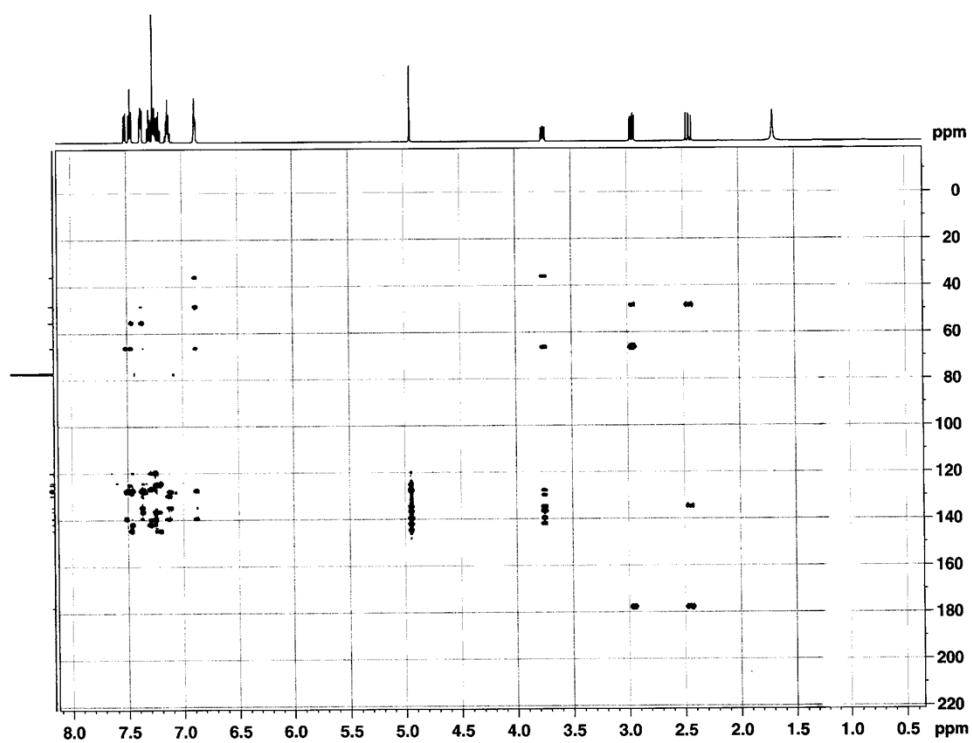

HSQC NMR spectrum (600MHz, CDCl<sub>3</sub>) of (±) 2-azahexacyclo[10.6.6.0<sup>1,5</sup>.0<sup>6,11</sup>.0<sup>13,18</sup>.0<sup>19,24</sup>] tetracos- 6(11),7,9,13,15,17,19(24),20,22-nonaen-3-one **4a**

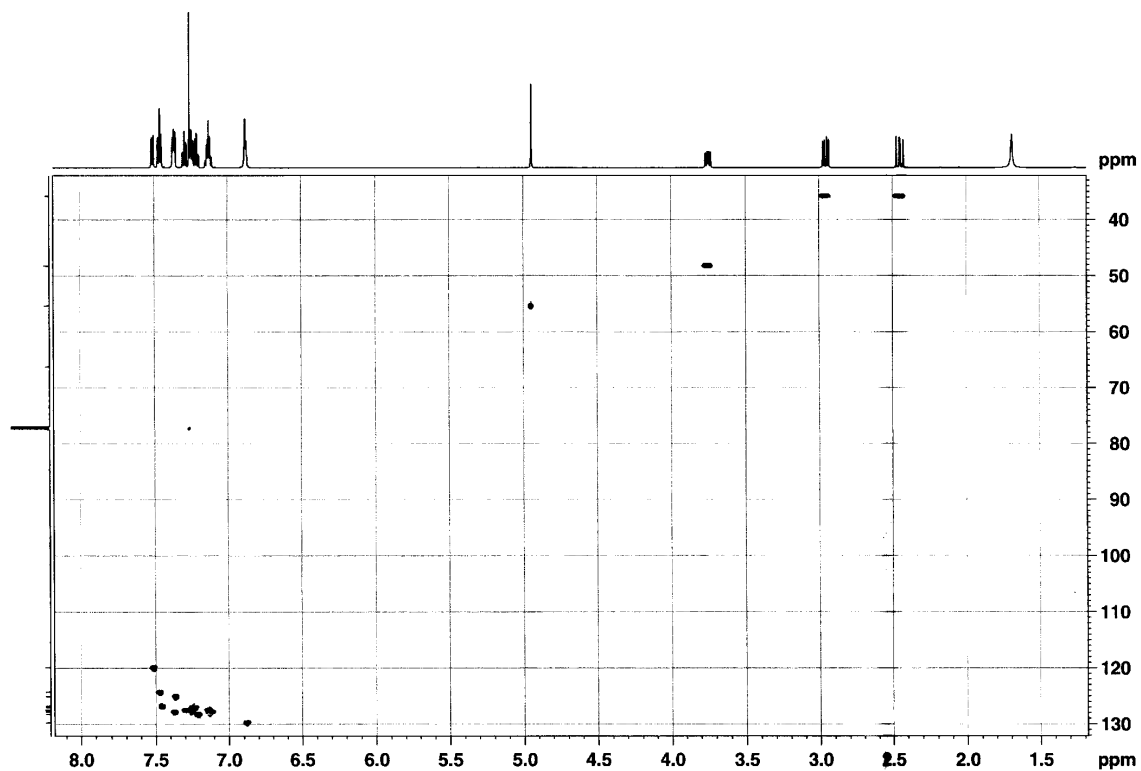

$^1\text{H}$ -NMR spectrum (500MHz,  $\text{CDCl}_3$ ) of ( $\pm$ ) 2-methyl-2-azahexacyclo[10.6.6.0<sup>1,5</sup>.0<sup>6,11</sup>.0<sup>13,18</sup>.0<sup>19,24</sup>] tetracos-6(11),7,9,13,15,17,19(24),20,22-nonaen-3-one **4b**

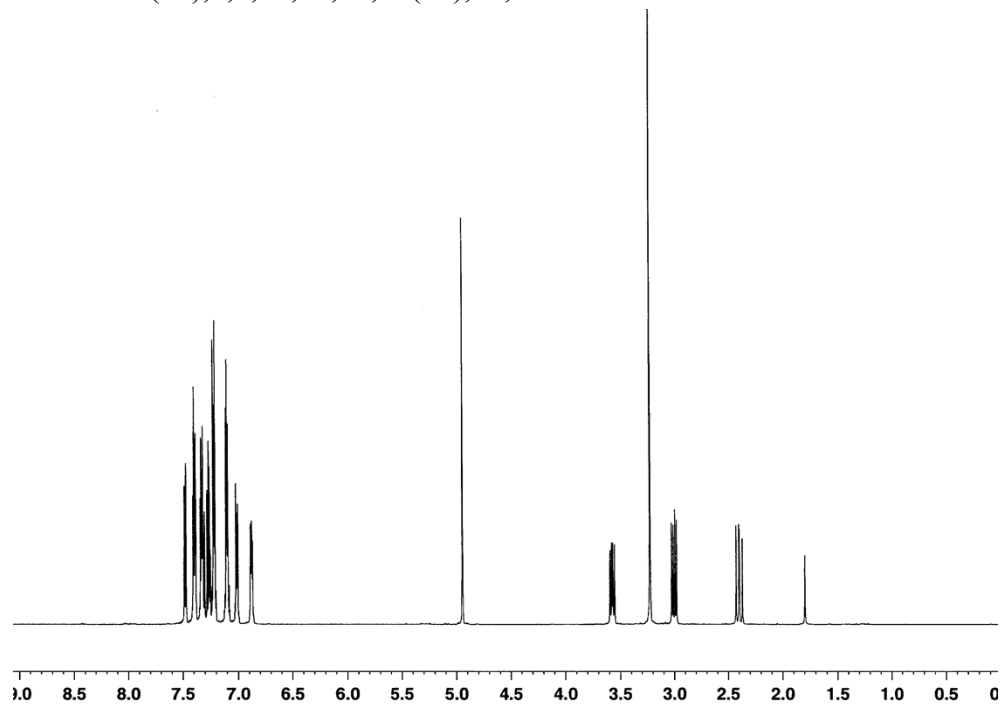

$^{13}\text{C}$ -NMR spectrum (125MHz,  $\text{CDCl}_3$ ) of ( $\pm$ ) 2-methyl-2-azahexacyclo[10.6.6.0<sup>1,5</sup>.0<sup>6,11</sup>.0<sup>13,18</sup>.0<sup>19,24</sup>] tetracos-6(11),7,9,13,15,17,19(24),20,22-nonaen-3-one **4b**

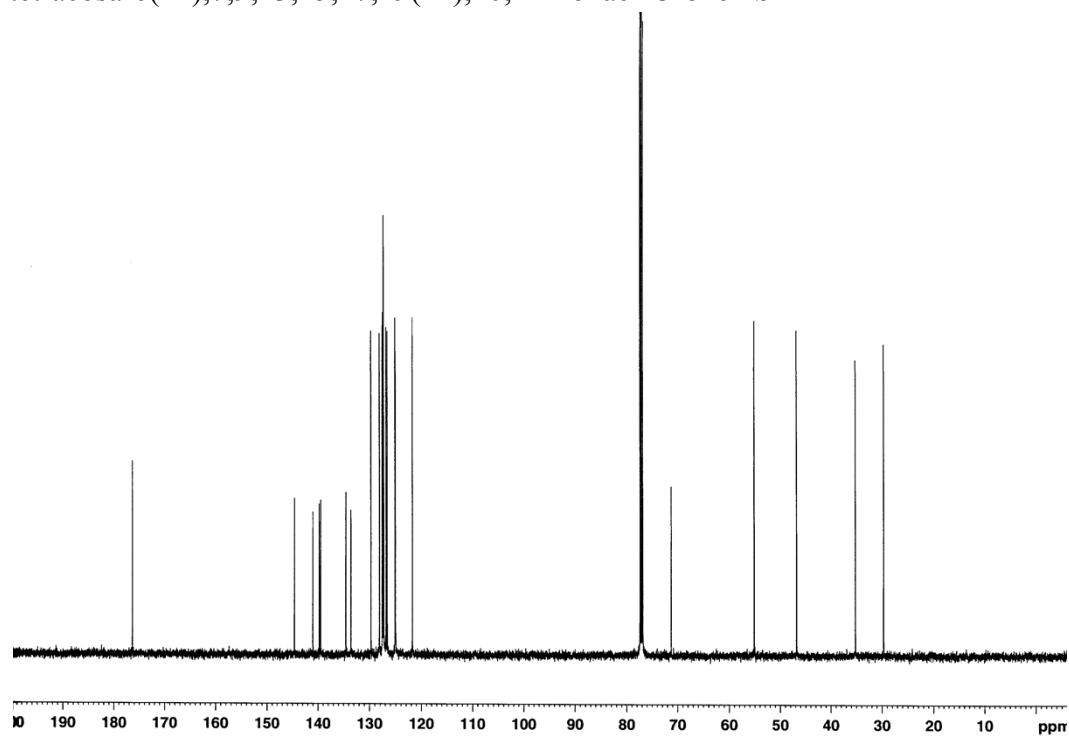

$^1\text{H-NMR}$  spectrum (500MHz,  $\text{CDCl}_3$ ) of ( $\pm$ ) 2-ethyl-2-azahexacyclo[10.6.6.0<sup>1,5</sup>.0<sup>6,11</sup>.0<sup>13,18</sup>.0<sup>19,24</sup>] tetracos-6(11),7,9,13,15,17,19(24),20,22-nonaen-3-one **4c**

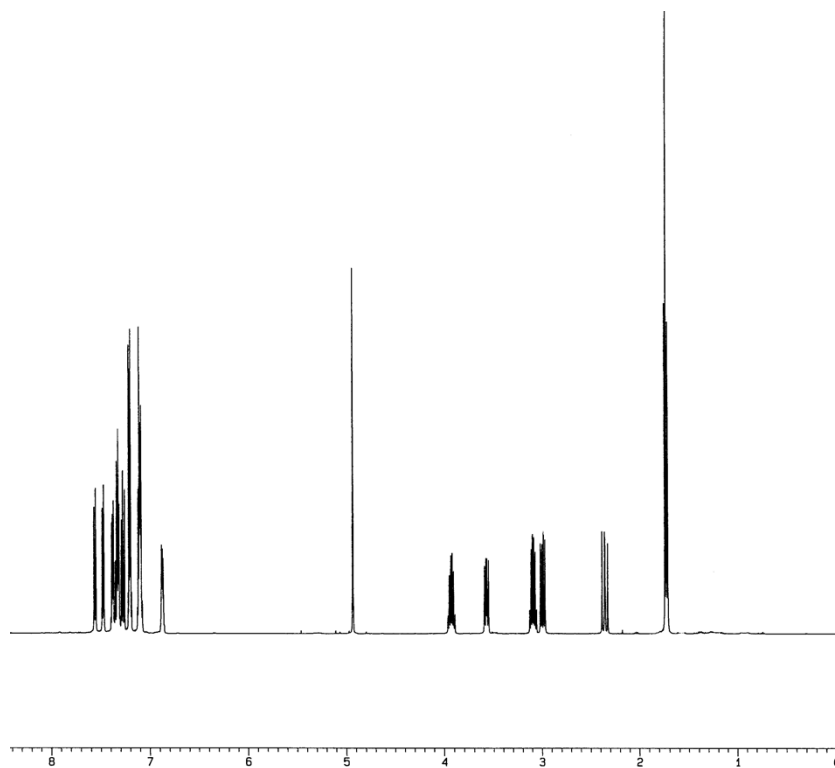

$^{13}\text{C-NMR}$  spectrum (125MHz,  $\text{CDCl}_3$ ) of ( $\pm$ ) 2-ethyl-2-azahexacyclo[10.6.6.0<sup>1,5</sup>.0<sup>6,11</sup>.0<sup>13,18</sup>.0<sup>19,24</sup>] tetracos-6(11),7,9,13,15,17,19(24),20,22-nonaen-3-one **4c**

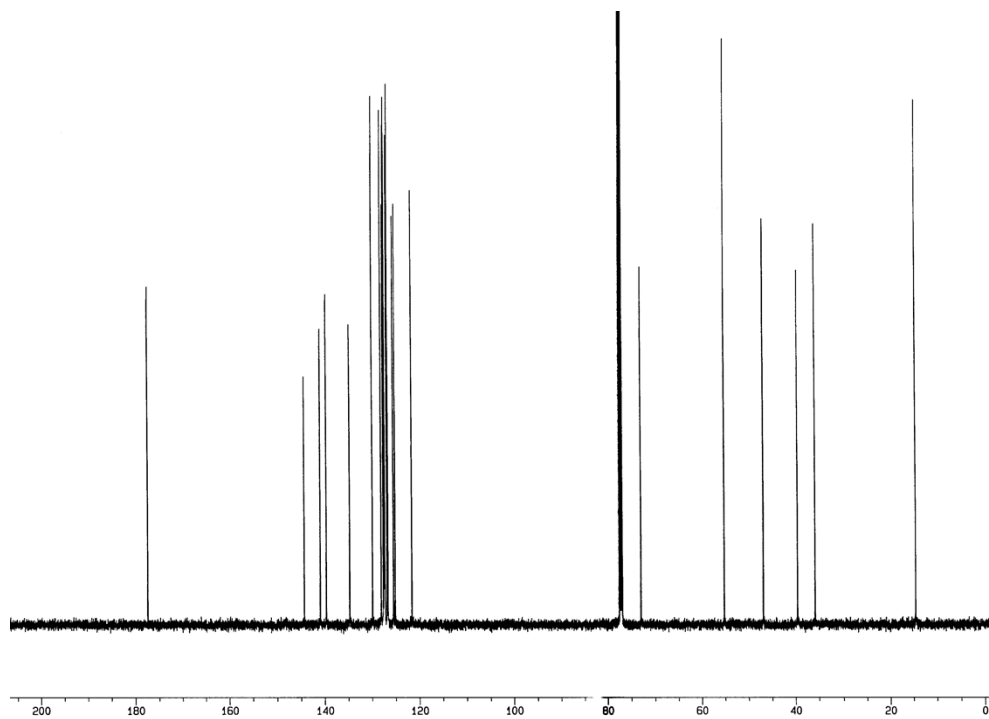

$^1\text{H-NMR}$  spectrum (600MHz,  $\text{CDCl}_3$ ) of  $(\pm)$  2-benzyl-2-azahexacyclo[10.6.6.0<sup>1,5</sup>.0<sup>6,11</sup>.0<sup>13,18</sup>.0<sup>19,24</sup>] tetracos-6(11),7,9,13,15,17,19(24),20,22-nonaen-3-one **4d**

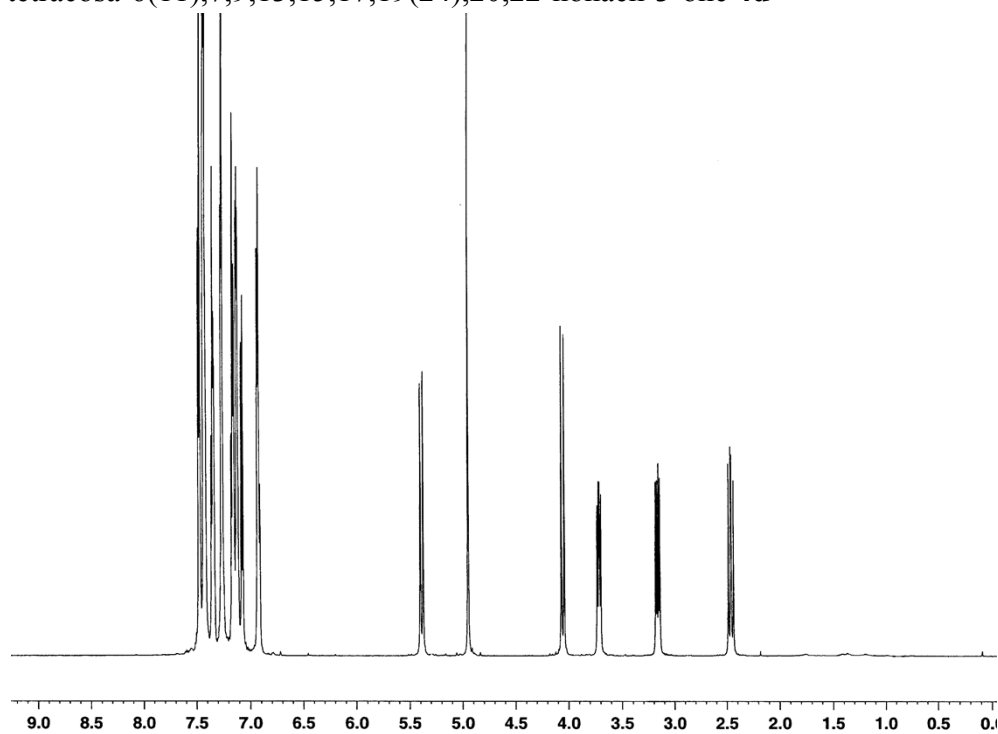

$^{13}\text{C-NMR}$  spectrum (150 MHz,  $\text{CDCl}_3$ ) of  $(\pm)$  2-benzyl-2-azahexacyclo[10.6.6.0<sup>1,5</sup>.0<sup>6,11</sup>.0<sup>13,18</sup>.0<sup>19,24</sup>] tetracos-6(11),7,9,13,15,17,19(24),20,22-nonaen-3-one **4d**

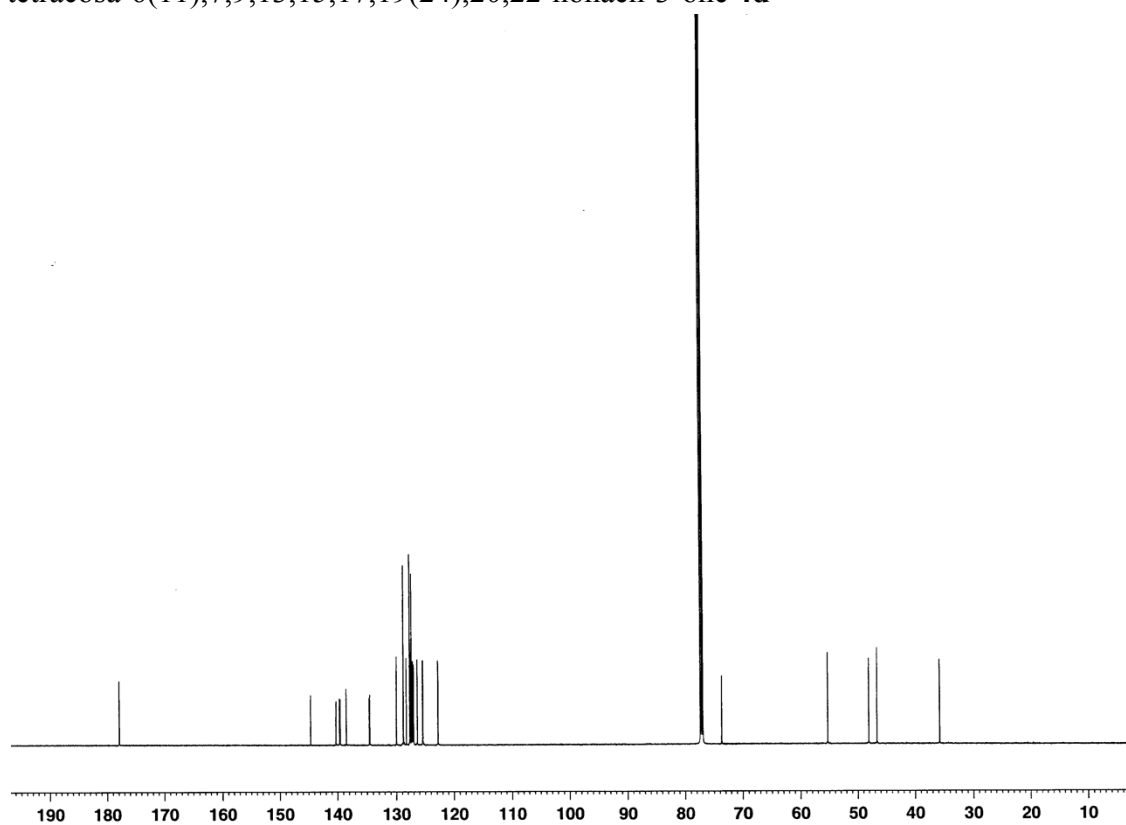

$^1\text{H}$ -NMR spectrum (500MHz,  $\text{CDCl}_3$ ) of ( $\pm$ ) 9-methyl-2-azahexacyclo[10.6.6.0<sup>1,5</sup>.0<sup>6,11</sup>.0<sup>13,18</sup>.0<sup>19,24</sup>] tetracos- 6(11),7,9,13,15,17,19(24),20,22-nonaen-3-one **4e**

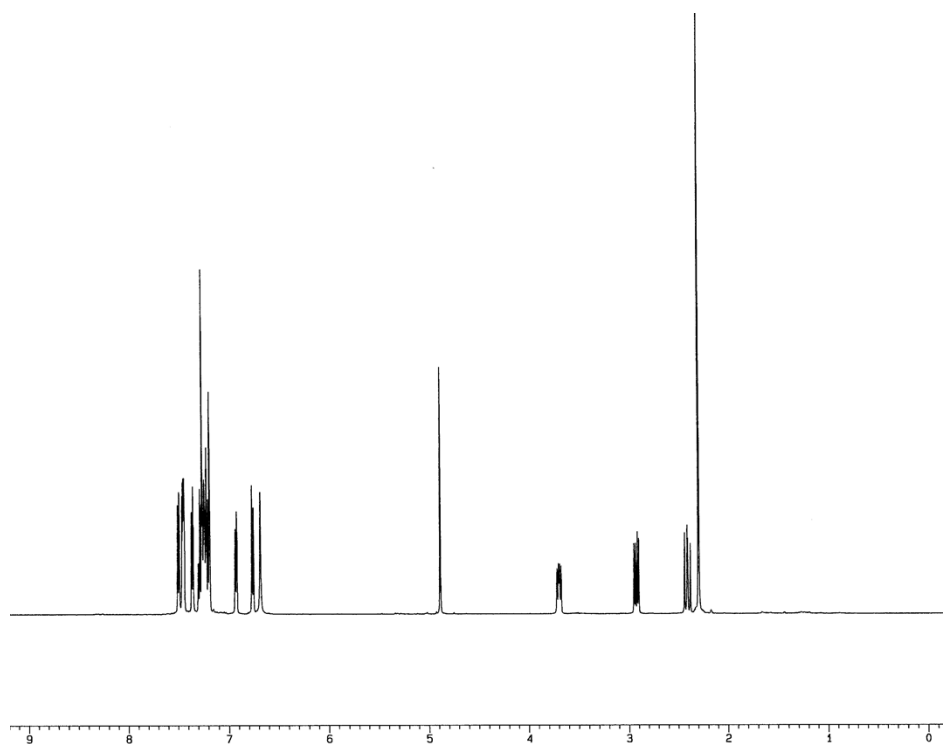

$^{13}\text{C}$ -NMR spectrum (125MHz,  $\text{CDCl}_3$ ) of ( $\pm$ ) 9-methyl-2-azahexacyclo[10.6.6.0<sup>1,5</sup>.0<sup>6,11</sup>.0<sup>13,18</sup>.0<sup>19,24</sup>] tetracos- 6(11),7,9,13,15,17,19(24),20,22-nonaen-3-one **4e**

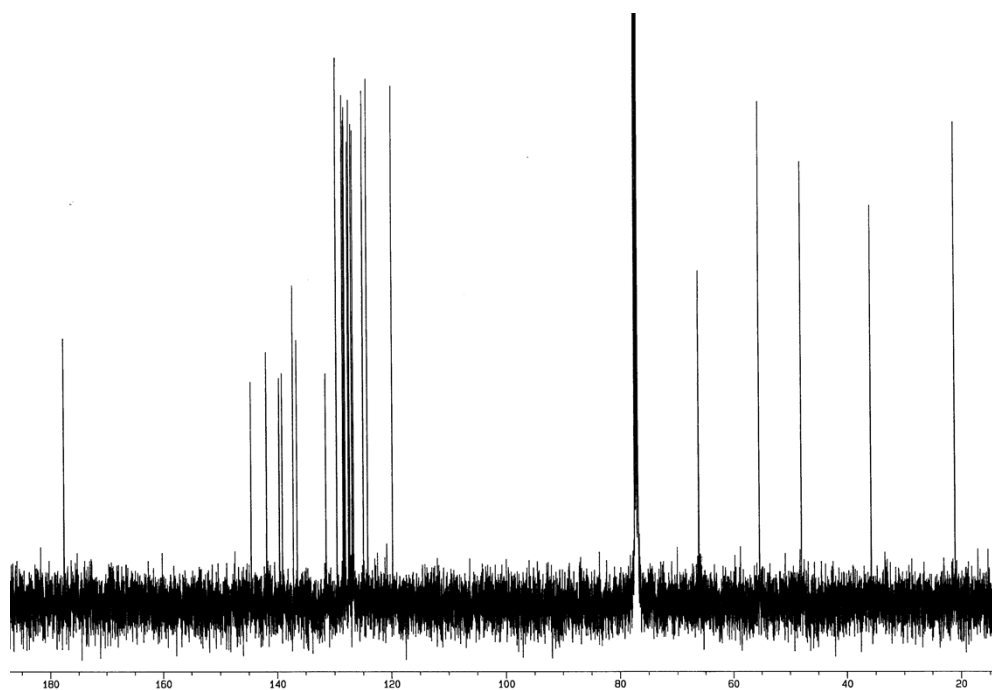

$^1\text{H-NMR}$  spectrum (600MHz,  $\text{CDCl}_3$ ) of ( $\pm$ ) 2-benzyl-9-methyl-2-azahexacyclo[10.6.6.0<sup>1,5</sup>.0<sup>6,11</sup>.0<sup>13,18</sup>.0<sup>19,24</sup>]tetracos-6(11),7,9,13,15,17,19(24),20,22-nonaen-3-one **4f**

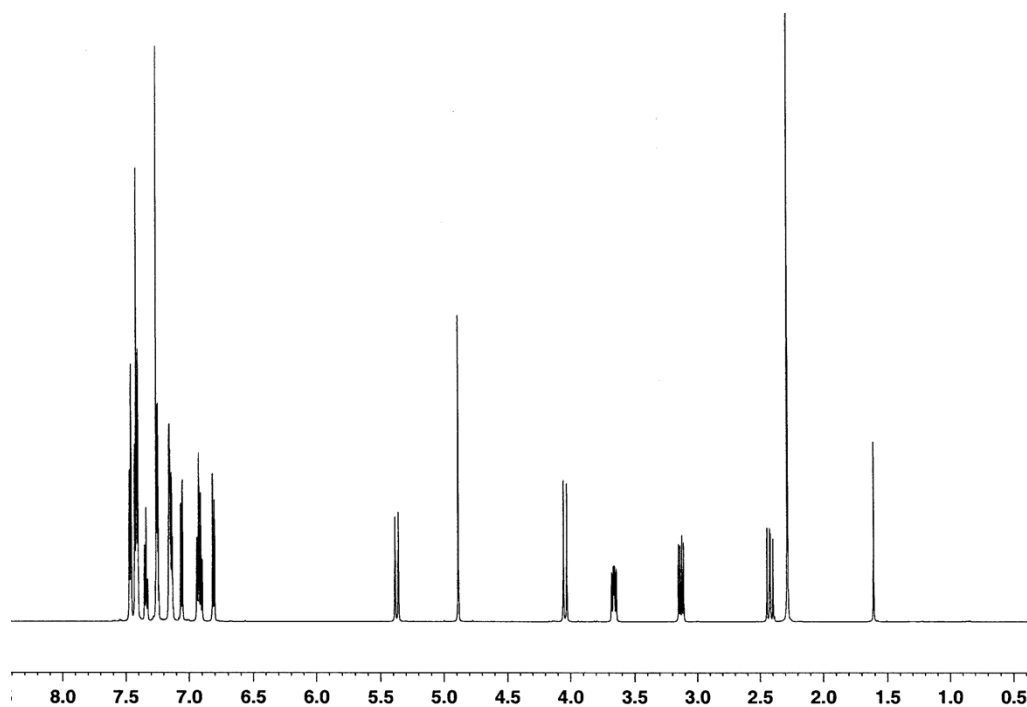

$^{13}\text{C-NMR}$  spectrum (125MHz,  $\text{CDCl}_3$ ) of ( $\pm$ ) 2-benzyl-9-methyl-2-azahexacyclo[10.6.6.0<sup>1,5</sup>.0<sup>6,11</sup>.0<sup>13,18</sup>.0<sup>19,24</sup>]tetracos-6(11),7,9,13,15,17,19(24),20,22-nonaen-3-one **4f**

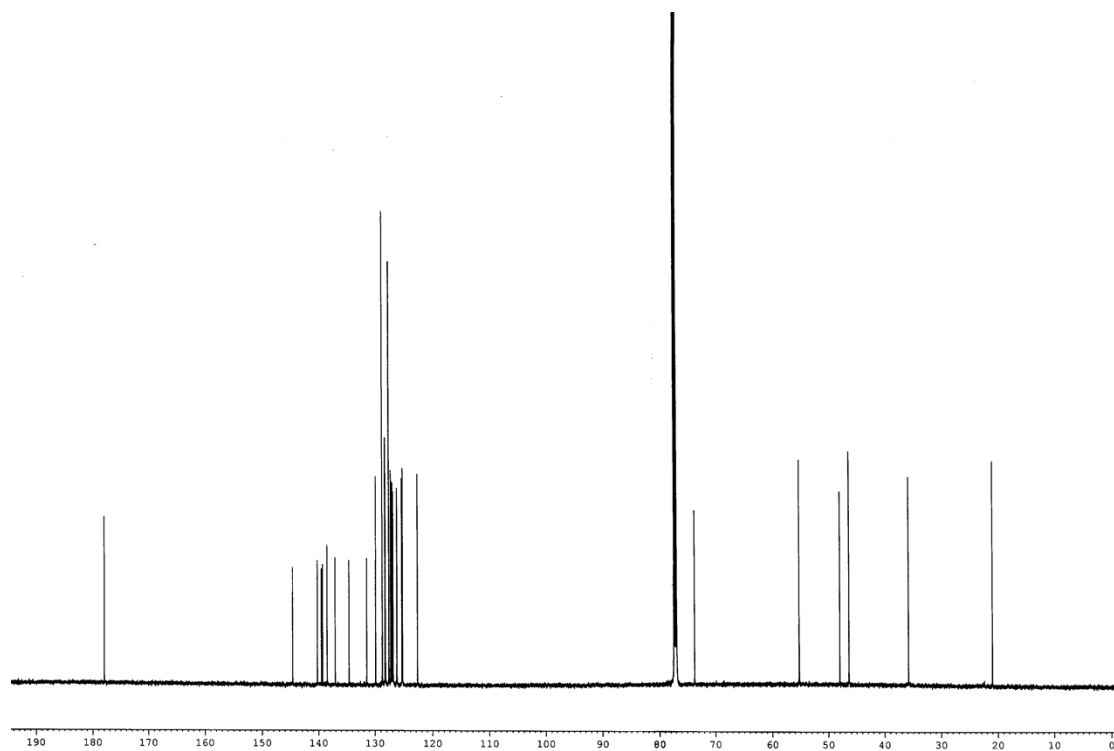

$^1\text{H-NMR}$  spectrum (500MHz,  $\text{CDCl}_3$ ) of ( $\pm$ ) 9-chloro-2-azahexacyclo[10.6.6.0<sup>1,5</sup>.0<sup>6,11</sup>.0<sup>13,18</sup>.0<sup>19,24</sup>] tetracos-6(11),7,9,13,15,17,19(24),20,22-nonaen-3-one **4g**

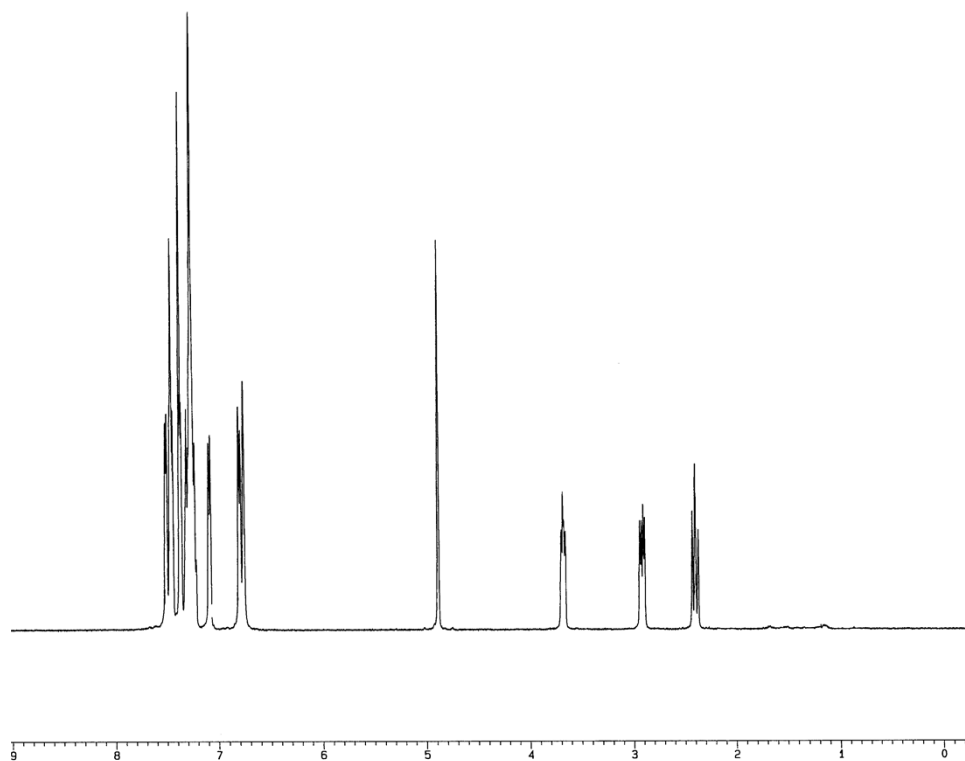

$^{13}\text{C-NMR}$  spectrum (125MHz,  $\text{CDCl}_3$ ) of ( $\pm$ ) 9-chloro-2-azahexacyclo[10.6.6.0<sup>1,5</sup>.0<sup>6,11</sup>.0<sup>13,18</sup>.0<sup>19,24</sup>] tetracos-6(11),7,9,13,15,17,19(24),20,22-nonaen-3-one **4g**

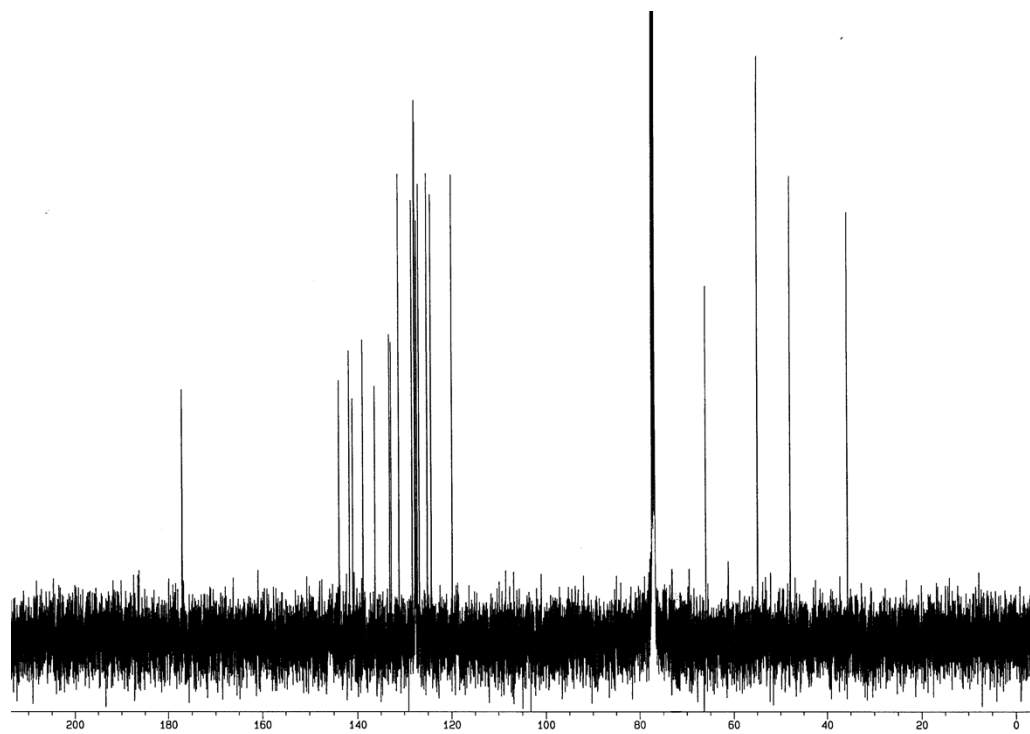



$^1\text{H-NMR}$  spectrum (500MHz,  $\text{CDCl}_3$ ) of ( $\pm$ ) 2-benzyl-9-chloro-2-azahexacyclo[10.6.6.0<sup>1,5</sup>.0<sup>6,11</sup>.0<sup>13,18</sup>.0<sup>19,24</sup>]tetracos-6(11),7,9,13,15,17,19(24),20,22-nonaen-3-one **4h**

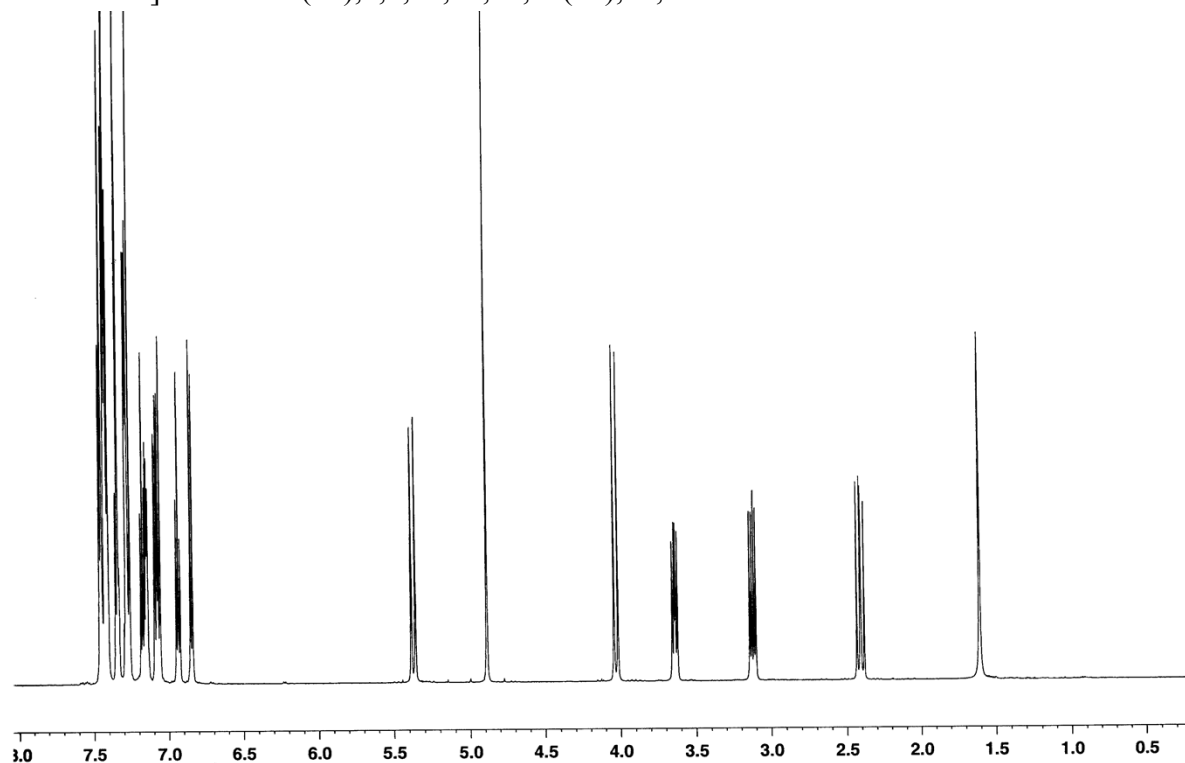

$^{13}\text{C-NMR}$  spectrum (125MHz,  $\text{CDCl}_3$ ) of ( $\pm$ ) 2-benzyl-9-chloro-2-azahexacyclo[10.6.6.0<sup>1,5</sup>.0<sup>6,11</sup>.0<sup>13,18</sup>.0<sup>19,24</sup>]tetracos-6(11),7,9,13,15,17,19(24),20,22-nonaen-3-one **4h**

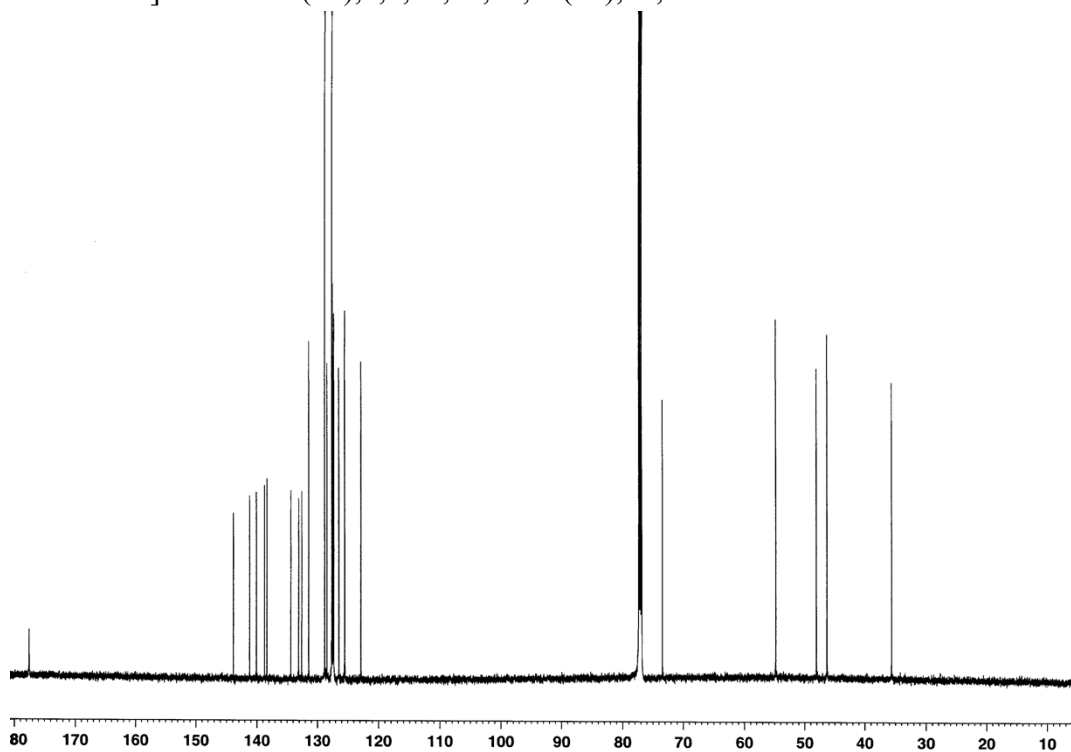

$^1\text{H-NMR}$  spectrum (600MHz,  $\text{CDCl}_3$ ) of ( $\pm$ ) 9-methoxy-2-azahexacyclo[10.6.6.0<sup>1,5</sup>.0<sup>6,11</sup>.0<sup>13,18</sup>.0<sup>19,24</sup>] tetracos-6(11),7,9,13,15,17,19(24),20,22-nonaen-3-one **4k**

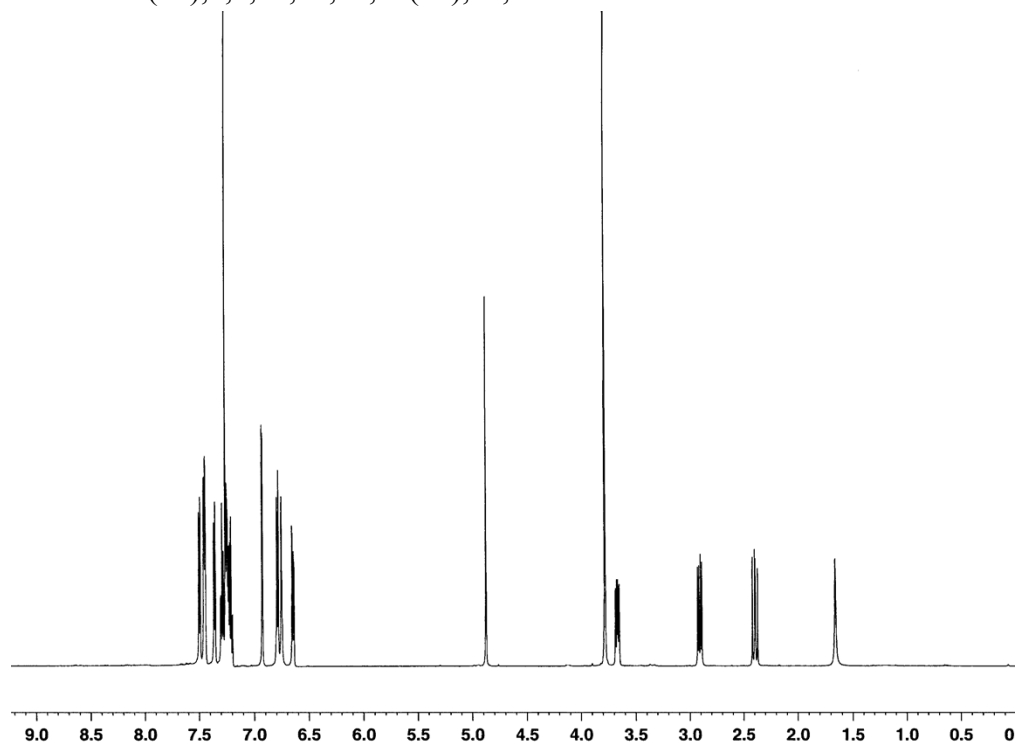

$^{13}\text{C-NMR}$  spectrum (150MHz,  $\text{CDCl}_3$ ) of ( $\pm$ ) 9-methoxy-2-azahexacyclo[10.6.6.0<sup>1,5</sup>.0<sup>6,11</sup>.0<sup>13,18</sup>.0<sup>19,24</sup>] tetracos-6(11),7,9,13,15,17,19(24),20,22-nonaen-3-one **4k**

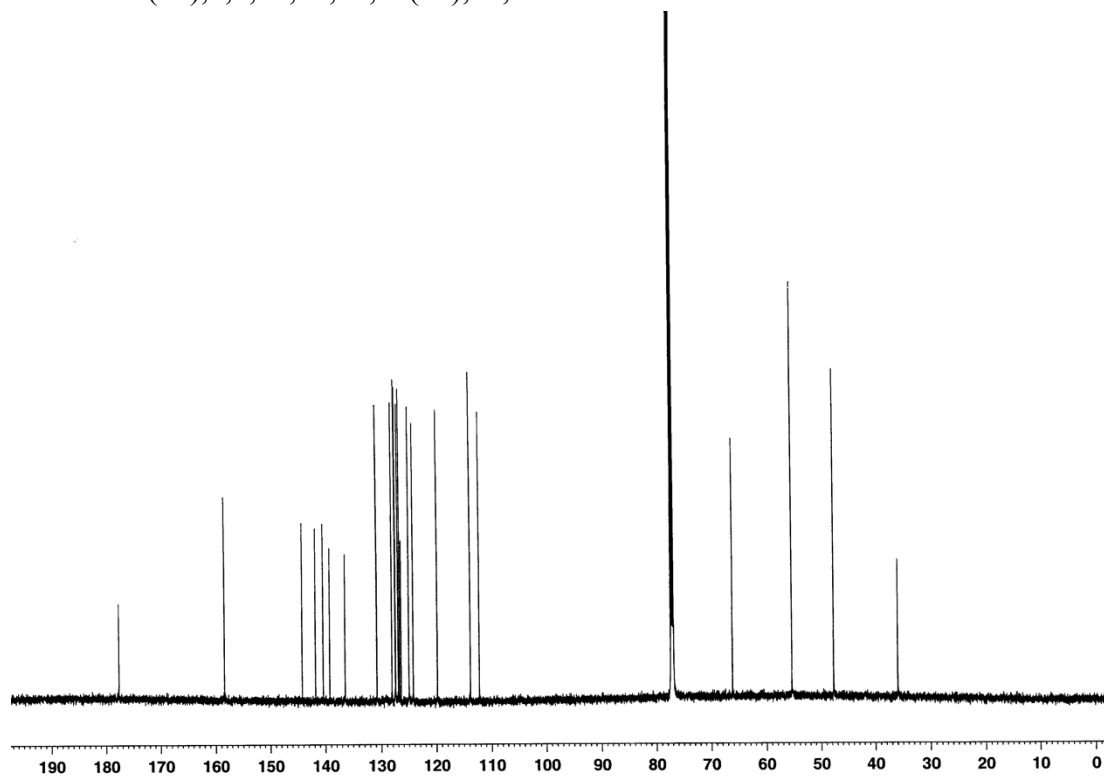

$^1\text{H-NMR}$  spectrum (600MHz,  $\text{CDCl}_3$ ) of ( $\pm$ ) 2-benzyl-9-methoxy-2-azahexacyclo[10.6.6.0<sup>1,5</sup>.0<sup>6,11</sup>.0<sup>13,18</sup>.0<sup>19,24</sup>]tetracos-6(11),7,9,13,15,17,19(24),20,22-nonaen-3-one **4I**

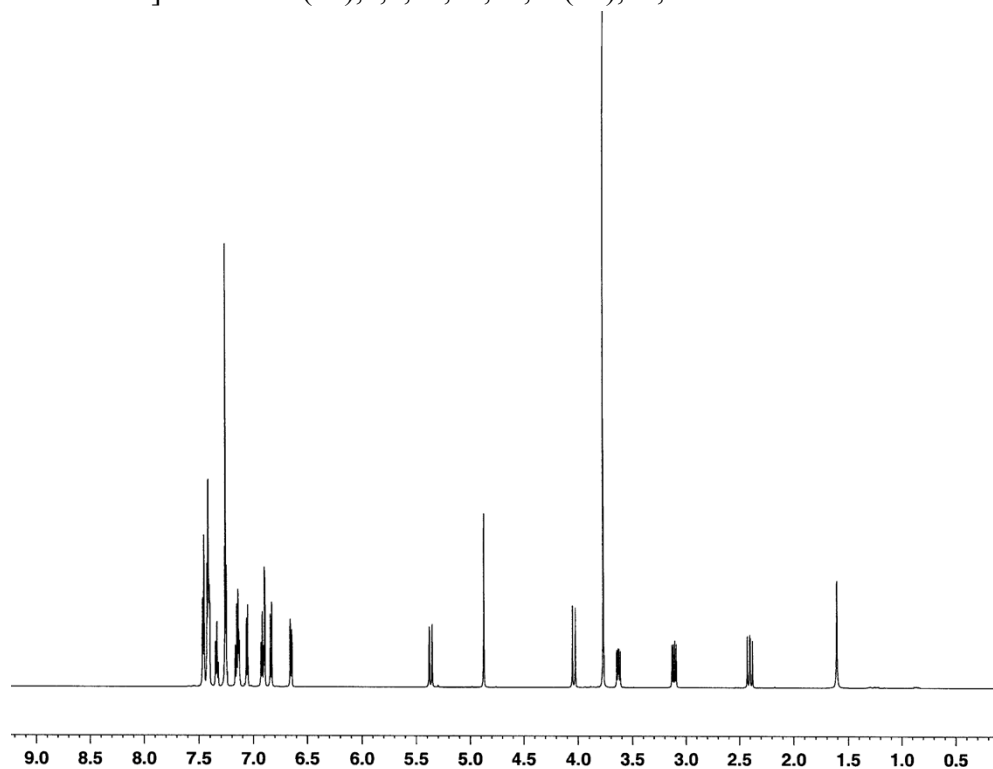

$^{13}\text{C-NMR}$  spectrum (150MHz,  $\text{CDCl}_3$ ) of ( $\pm$ ) 2-benzyl-9-methoxy-2-azahexacyclo[10.6.6.0<sup>1,5</sup>.0<sup>6,11</sup>.0<sup>13,18</sup>.0<sup>19,24</sup>]tetracos-6(11),7,9,13,15,17,19(24),20,22-nonaen-3-one **4I**

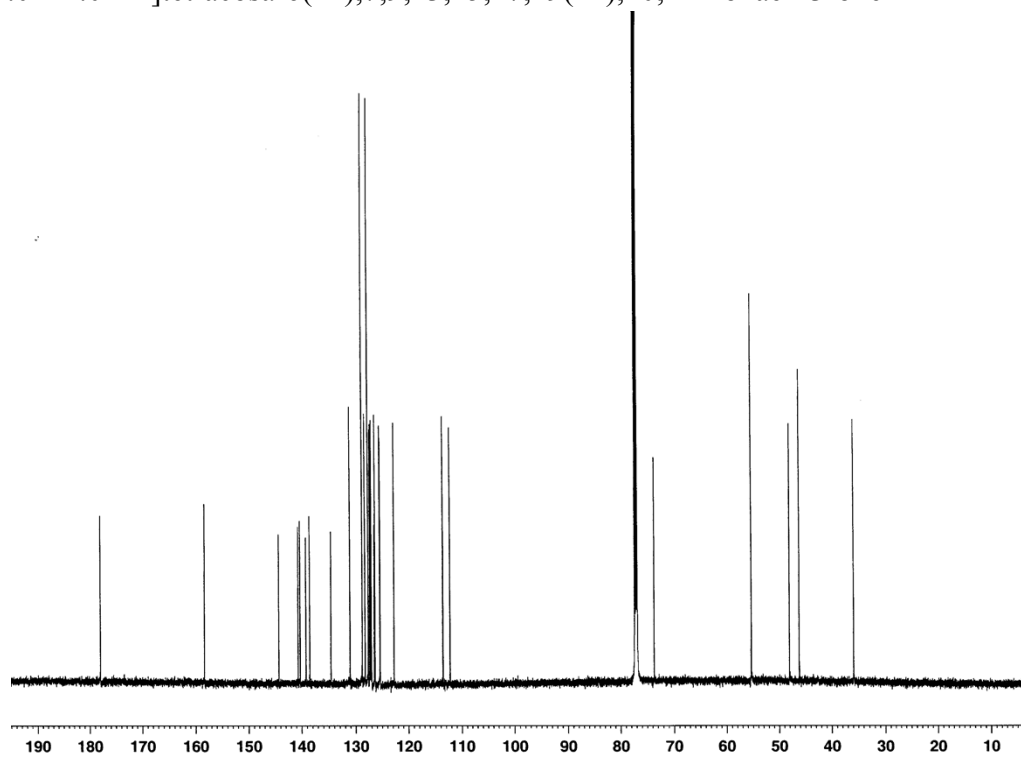

$^1\text{H-NMR}$  spectrum (500MHz,  $\text{CDCl}_3$ ) of ( $\pm$ ) 8-methyl-2-azahexacyclo[10.6.6.0<sup>1,5</sup>.0<sup>6,11</sup>.0<sup>13,18</sup>.0<sup>19,24</sup>] tetracos-6(11),7,9,13,15,17,19(24),20,22-nonaen-3-one **4m**

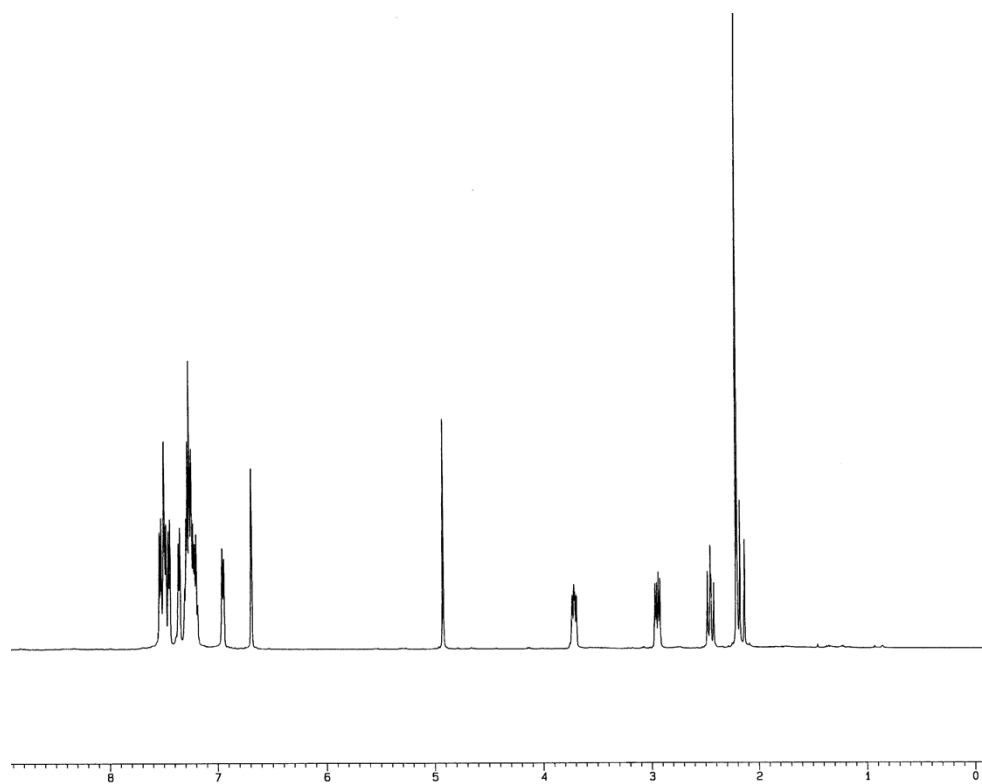

$^{13}\text{C-NMR}$  spectrum (125MHz,  $\text{CDCl}_3$ ) of ( $\pm$ ) 8-methyl-2-azahexacyclo[10.6.6.0<sup>1,5</sup>.0<sup>6,11</sup>.0<sup>13,18</sup>.0<sup>19,24</sup>] tetracos-6(11),7,9,13,15,17,19(24),20,22-nonaen-3-one **4m**

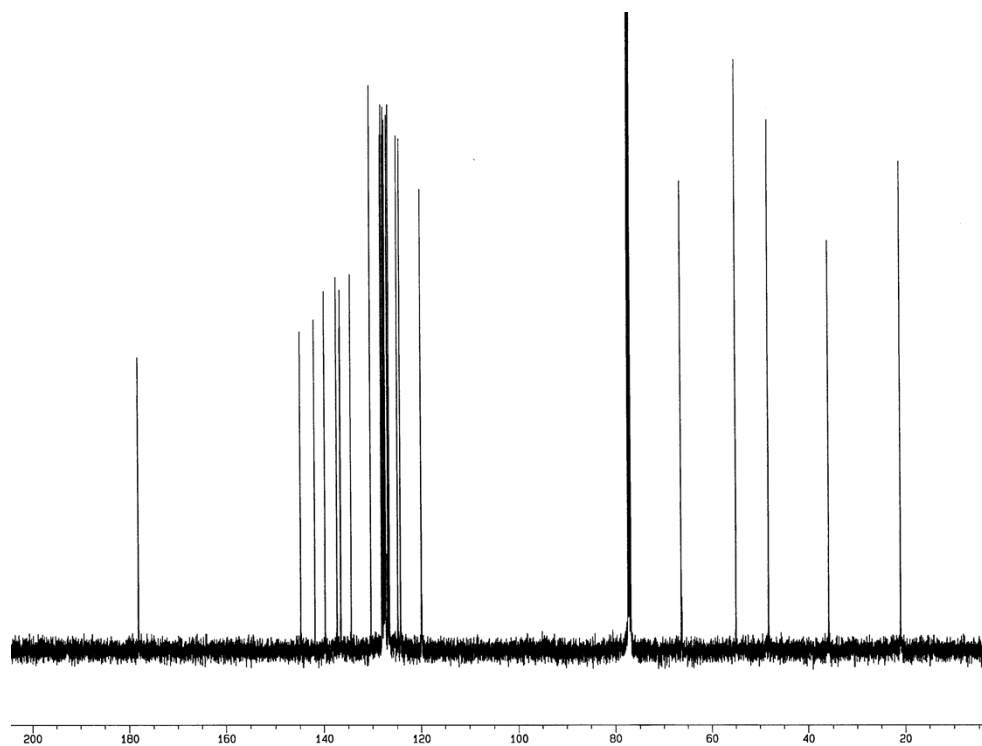

$^1\text{H-NMR}$  spectrum (600MHz,  $\text{CDCl}_3$ ) of ( $\pm$ ) 2-benzyl-8-methyl-2-azahexacyclo[10.6.6.0<sup>1,5</sup>.0<sup>6,11</sup>.0<sup>13,18</sup>.0<sup>19,24</sup>]tetracos-6(11),7,9,13,15,17,19(24),20,22-nonaen-3-one **4n**

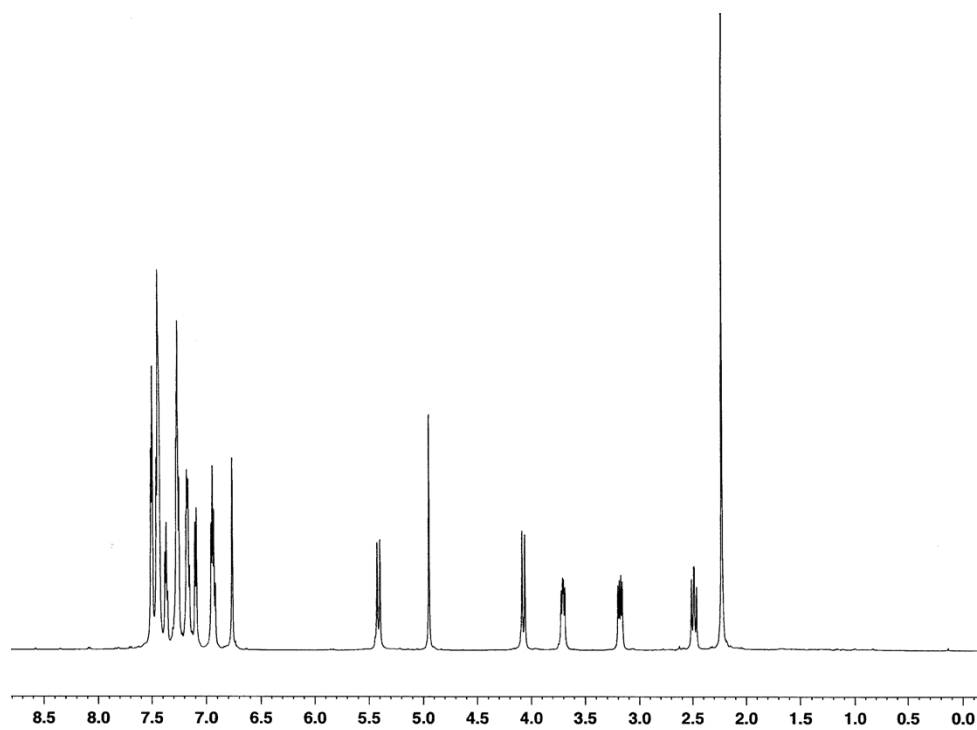

$^{13}\text{C-NMR}$  spectrum (150MHz,  $\text{CDCl}_3$ ) of ( $\pm$ ) 2-benzyl-8-methyl-2-azahexacyclo[10.6.6.0<sup>1,5</sup>.0<sup>6,11</sup>.0<sup>13,18</sup>.0<sup>19,24</sup>]tetracos-6(11),7,9,13,15,17,19(24),20,22-nonaen-3-one **4n**

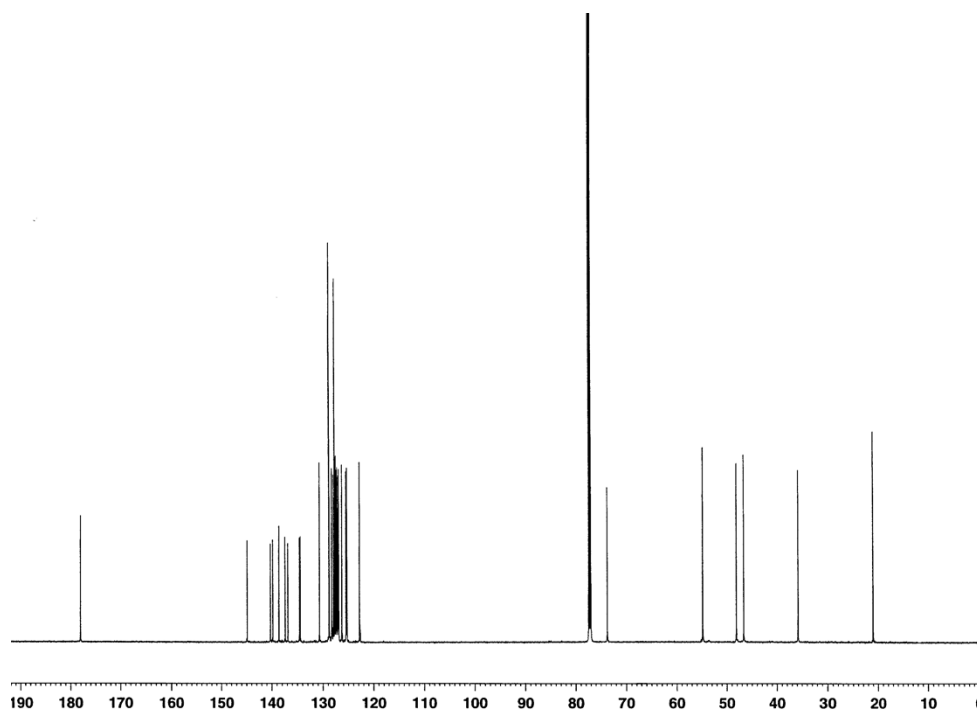

$^1\text{H-NMR}$  spectrum (600MHz,  $\text{CDCl}_3$ ) of ( $\pm$ ) 4-phenyl-3,4-dihydro-1H-1-azacyclohept[de]anthracen-2-one **7**

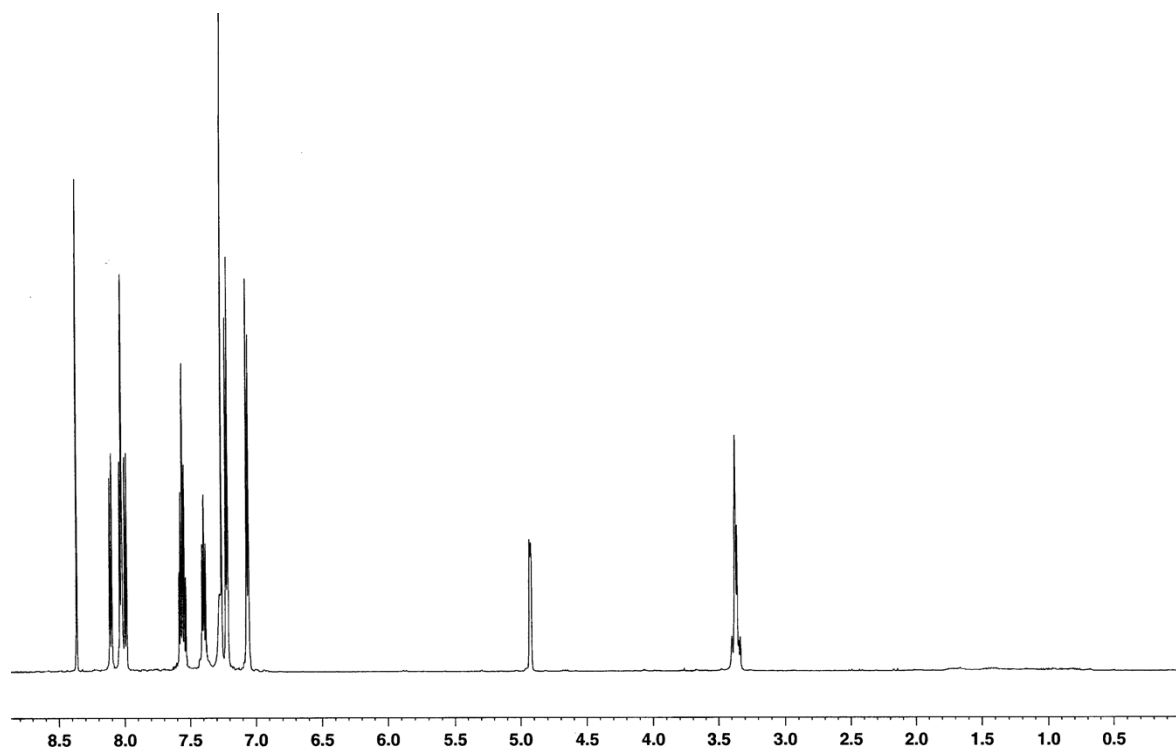

$^{13}\text{C-NMR}$  spectrum (125MHz,  $\text{CDCl}_3$ ) of ( $\pm$ ) 4-phenyl-3,4-dihydro-1H-1-azacyclohept[de]anthracen-2-one **7**

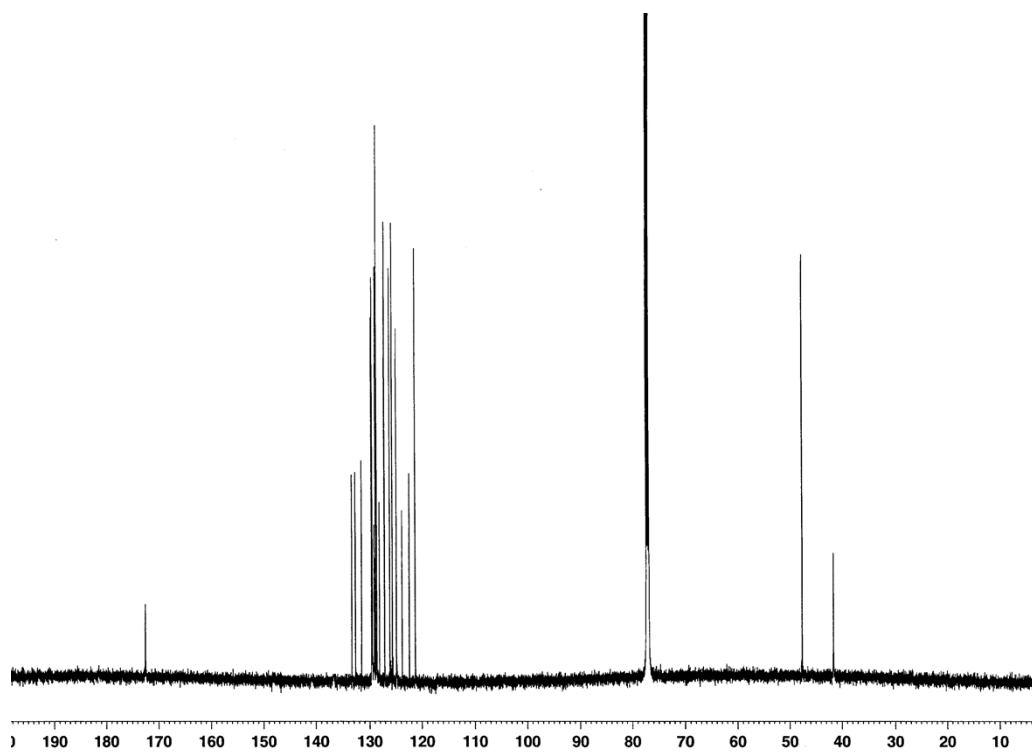



$^1\text{H-NMR}$  spectrum (600MHz,  $\text{CDCl}_3$ ) of *N*-(anthracen-9-yl-ethyl)-3-phenylacrylamide **8**

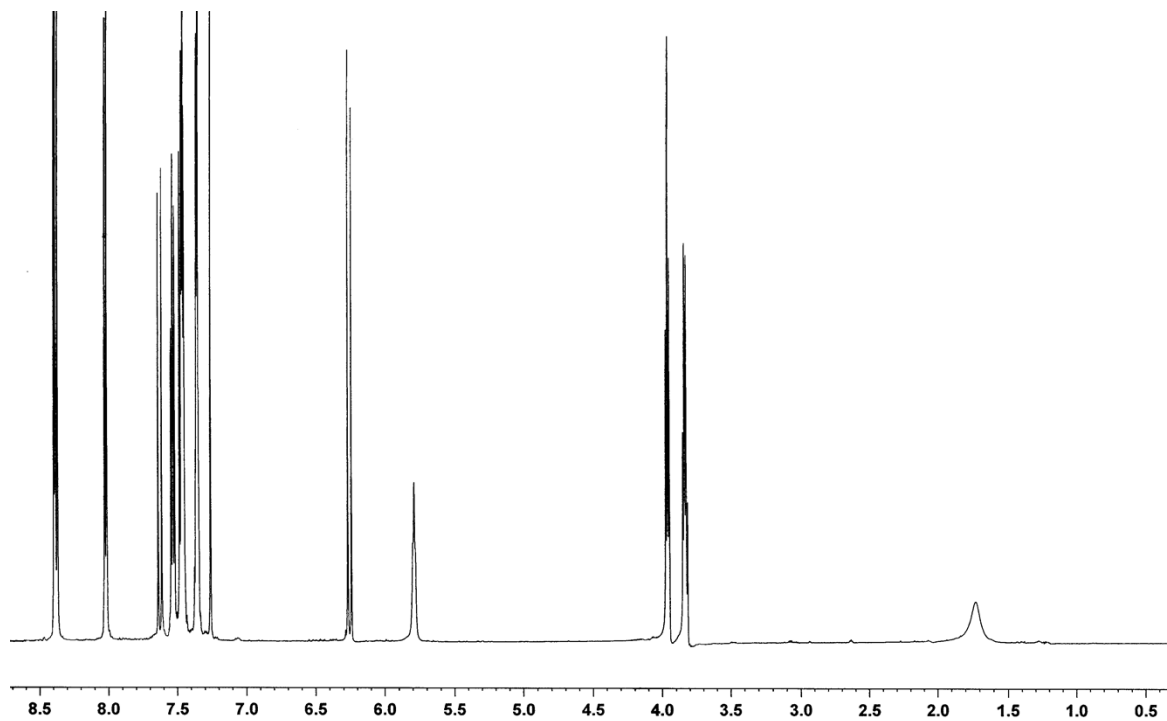

$^{13}\text{C-NMR}$  spectrum (125MHz,  $\text{CDCl}_3$ ) of *N*-(anthracen-9-yl-ethyl)-3-phenylacrylamide **8**

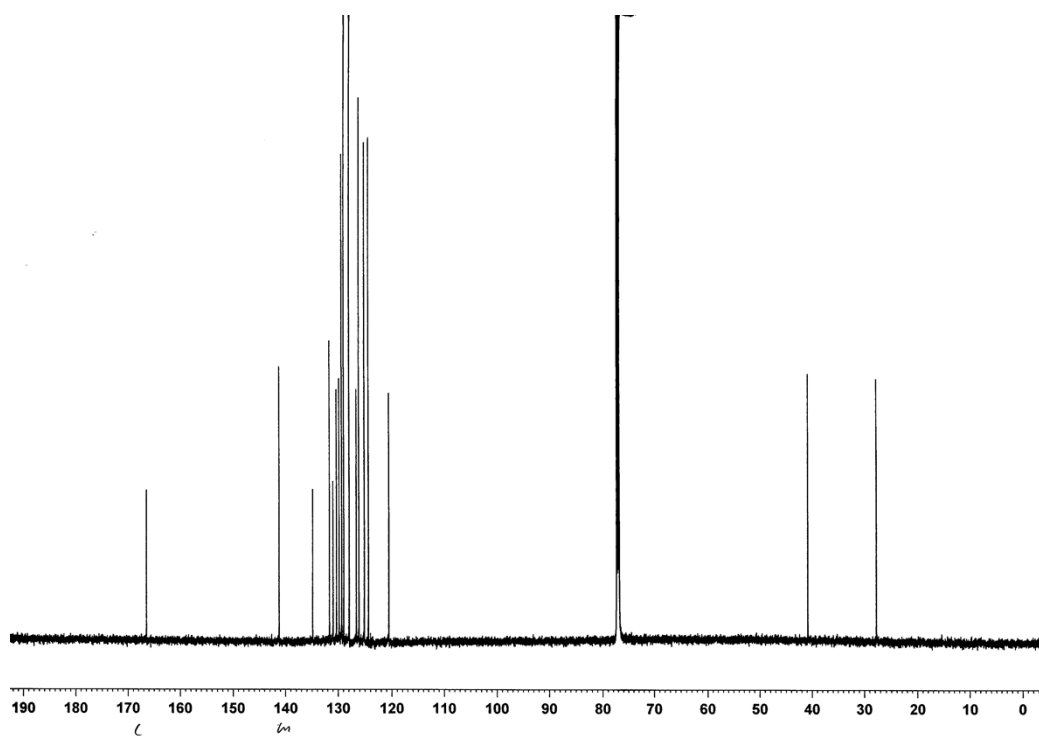



$^1\text{H-NMR}$  spectrum (600MHz,  $\text{CDCl}_3$ ) of (19S,20R)(19R,20S)-20-phenyl-17-azapentacyclo[6.-6-.6.-0<sup>1,19</sup>.0<sup>2,7</sup>.0<sup>9,14</sup>]jicosa- 2,4,6,9(14),10,12-hexaen-18-one **9**

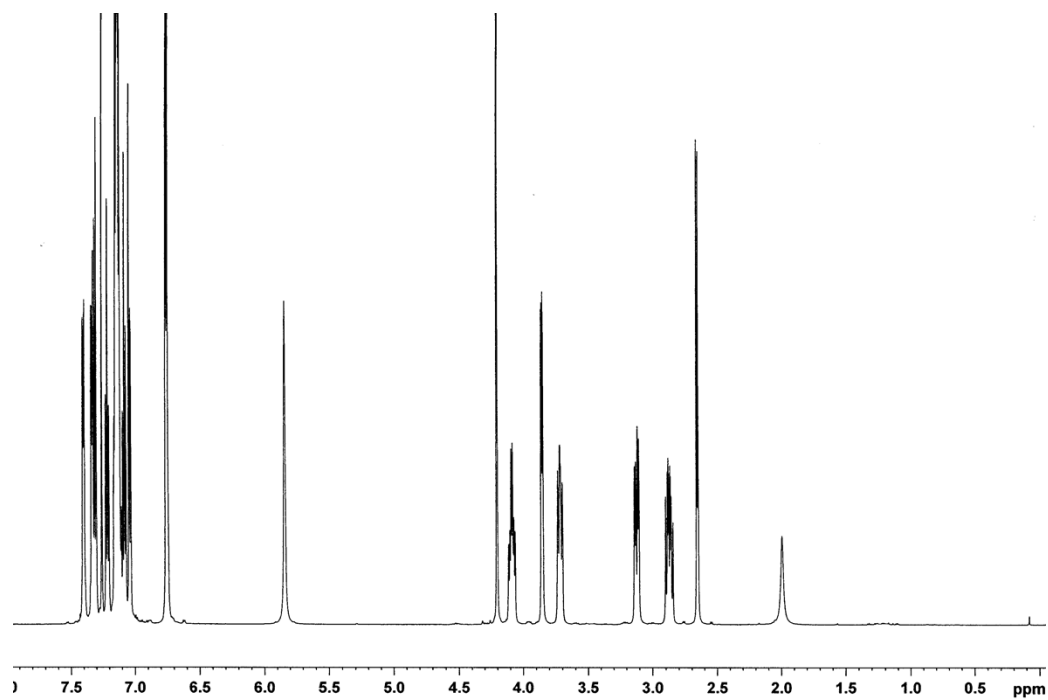

$^{13}\text{C-NMR}$  spectrum (125MHz,  $\text{CDCl}_3$ ) of (19S,20R)(19R,20S)-20-phenyl-17-azapentacyclo[6.-6-.6.-0<sup>1,19</sup>.0<sup>2,7</sup>.0<sup>9,14</sup>]jicosa- 2,4,6,9(14),10,12-hexaen-18-one **9**

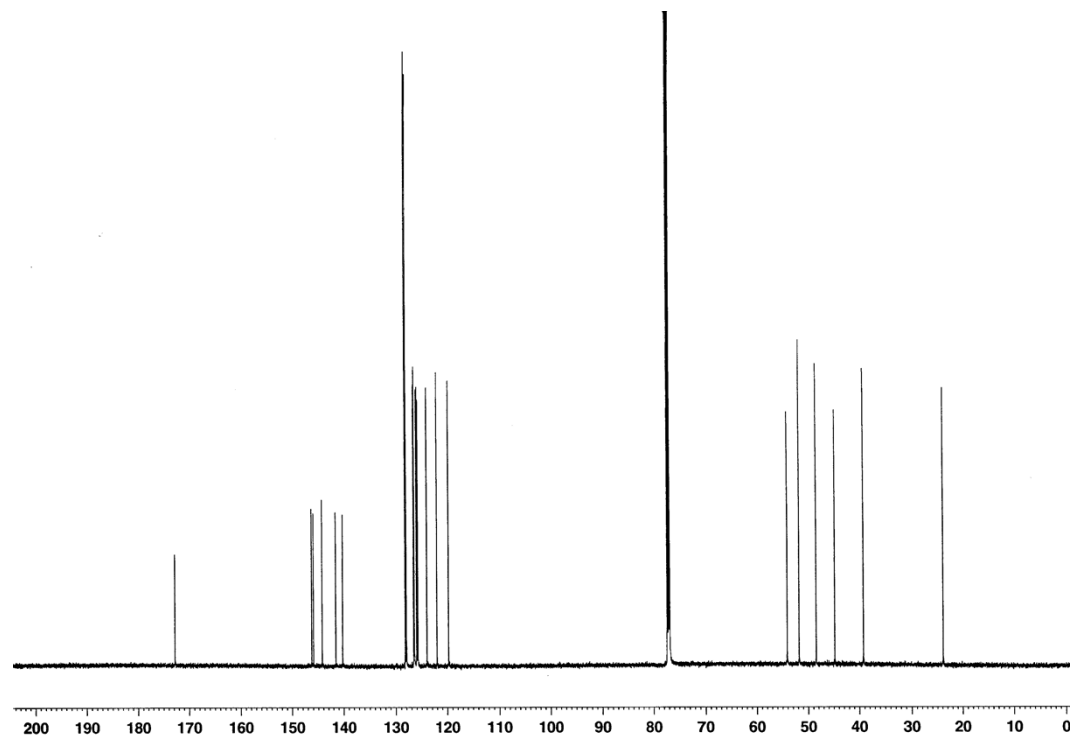

$^1\text{H-NMR}$  spectrum (600MHz,  $\text{CDCl}_3$ ) of *N*-(anthracen-9-yl-methyl)-*N*-methyl-3-phenylacryl-amide **10**

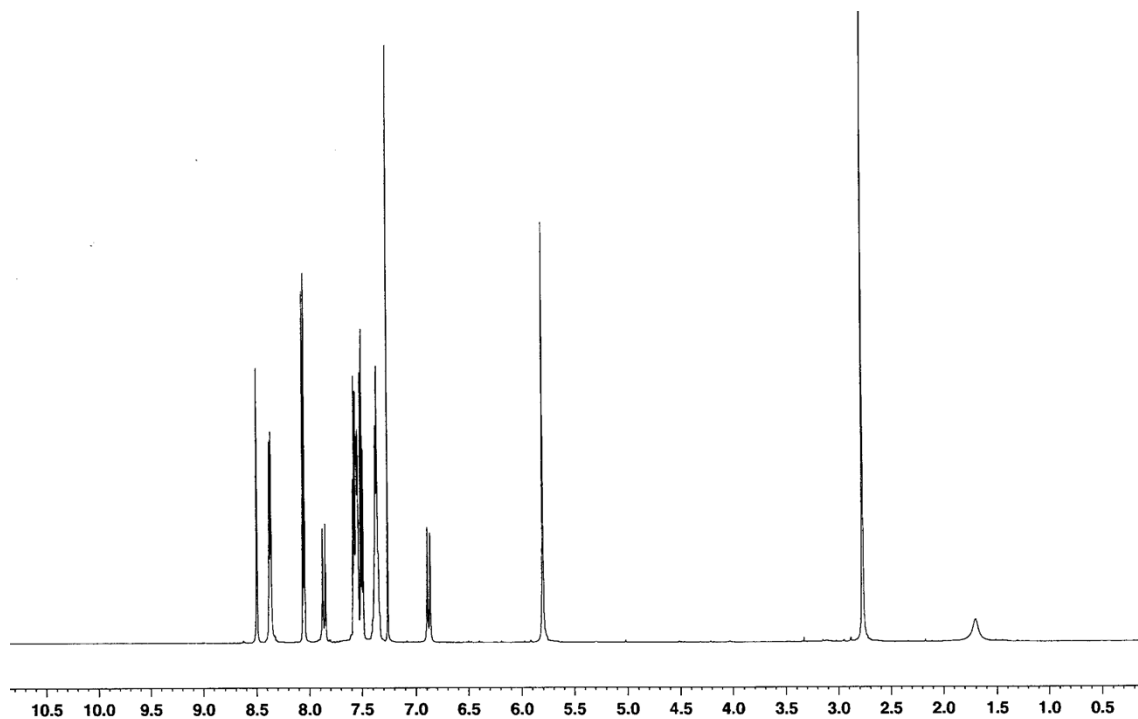

$^{13}\text{C-NMR}$  spectrum (125MHz,  $\text{CDCl}_3$ ) of *N*-(anthracen-9-yl-methyl)-*N*-methyl-3-phenylacryl-amide **10**

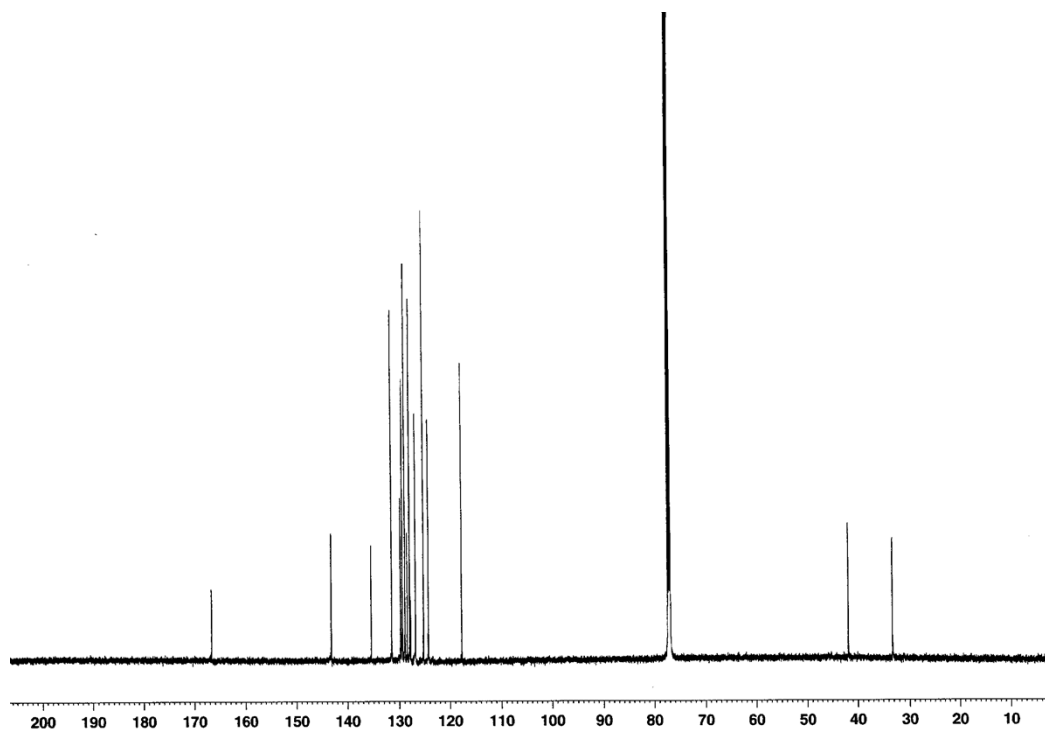

$^1\text{H}$ -NMR spectrum (600MHz,  $\text{CDCl}_3$ ) of ( $\pm$ ) 16-methyl-19-phenyl-16-azapentacyclo[6.6.5.0<sup>1,18</sup>.0<sup>2,7</sup>.0<sup>9,14</sup>]nonadeca-2,4,6,9(14),10,12-hexaen-17-one **11**

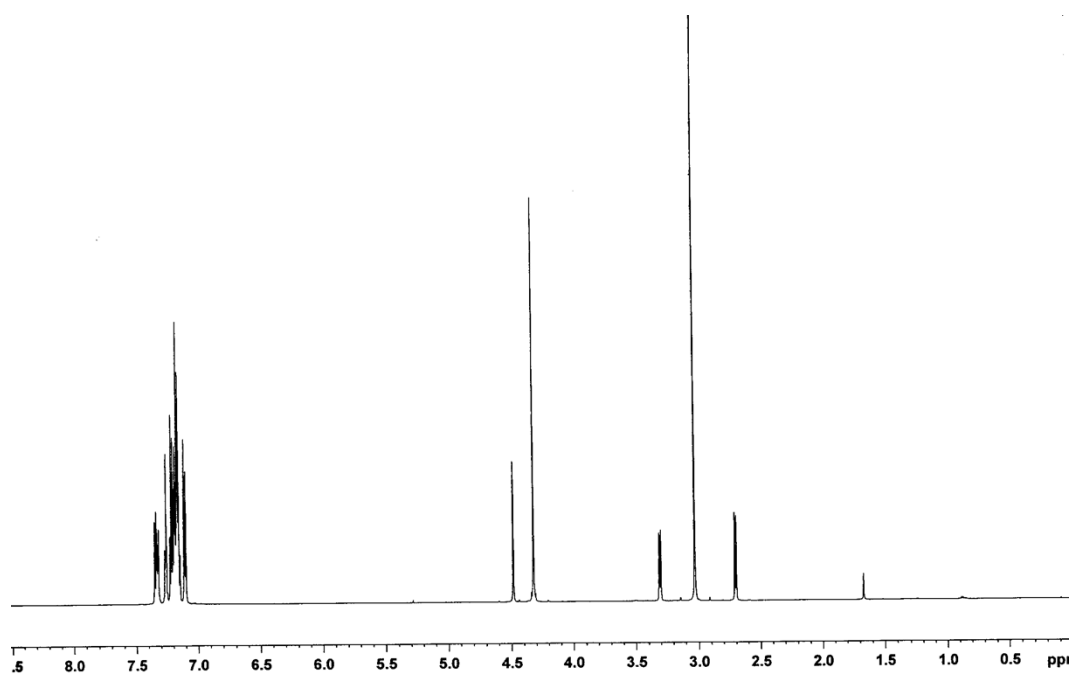

$^{13}\text{C}$ -NMR spectrum (125MHz,  $\text{CDCl}_3$ ) of ( $\pm$ ) 16-methyl-19-phenyl-16-azapentacyclo[6.6.5.0<sup>1,18</sup>.0<sup>2,7</sup>.0<sup>9,14</sup>]nonadeca-2,4,6,9(14),10,12-hexaen-17-one **11**

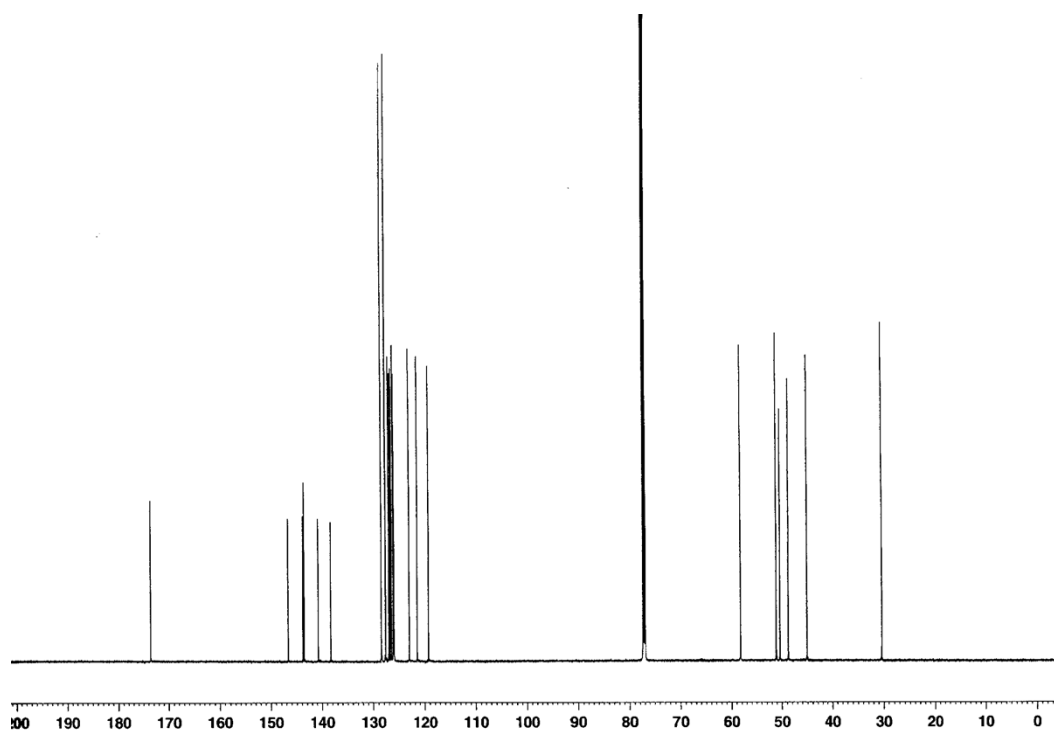

Supplement: c4ob00411f2.pdf [file c4ob00411f2.pdf]
