# Supplementary material for: Cyclisation reactions of N-cinnamoyl-9-aminoanthracenes
Source: Royal Society of Chemistry journal article supplement (doi:10.1039/c4ob00411f), 2014-01-01
Supplement: c4ob00411f1.pdf [file c4ob00411f1.pdf]

## **Cyclisation reactions of *N*-cinnamoyl-9-amino-anthracenes.**

Frank D. King,\* Abil Aliev, Stephen Caddick and Derek Tocher

Crystal data and structure refinement for **4b**

S2-S9

Crystal data and structure refinement for **9**

S10-S17

**Table 1 Crystal data and structure refinement for 4b**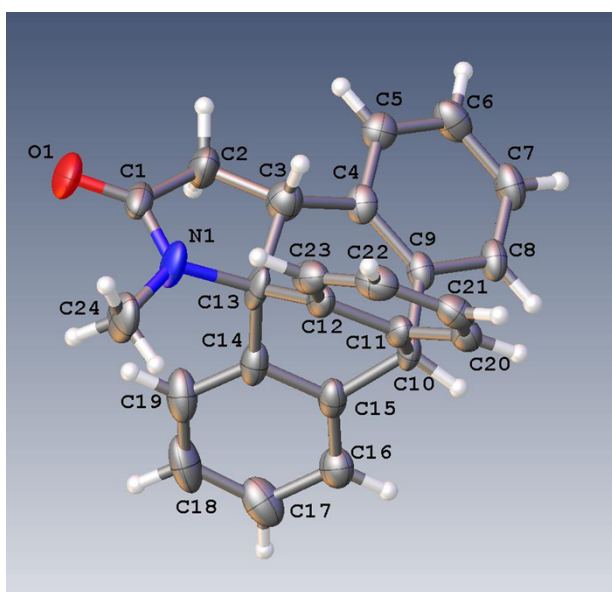

|                                             |                                                               |
|---------------------------------------------|---------------------------------------------------------------|
| Identification code                         | xstr0016                                                      |
| Empirical formula                           | C <sub>24</sub> H <sub>19</sub> NO                            |
| Formula weight                              | 337.40                                                        |
| Temperature/K                               | 150                                                           |
| Crystal system                              | monoclinic                                                    |
| Space group                                 | Cc                                                            |
| a/Å                                         | 16.9504(14)                                                   |
| b/Å                                         | 11.2305(10)                                                   |
| c/Å                                         | 9.1731(9)                                                     |
| α/°                                         | 90                                                            |
| β/°                                         | 103.305(10)                                                   |
| γ/°                                         | 90                                                            |
| Volume/Å <sup>3</sup>                       | 1699.3(3)                                                     |
| Z                                           | 4                                                             |
| ρ <sub>calc</sub> /mg/mm <sup>3</sup>       | 1.319                                                         |
| m/mm <sup>-1</sup>                          | 0.623                                                         |
| F(000)                                      | 712.0                                                         |
| Crystal size/mm <sup>3</sup>                | 0.21 × 0.18 × 0.04                                            |
| Radiation                                   | CuKα (λ = 1.54184)                                            |
| 2θ range for data collection                | 9.528 to 149.326°                                             |
| Index ranges                                | -20 ≤ h ≤ 20, -12 ≤ k ≤ 13, -10 ≤ l ≤ 6                       |
| Reflections collected                       | 2772                                                          |
| Independent reflections                     | 1846 [R <sub>int</sub> = 0.0370, R <sub>sigma</sub> = 0.0415] |
| Data/restraints/parameters                  | 1846/2/236                                                    |
| Goodness-of-fit on F <sup>2</sup>           | 1.029                                                         |
| Final R indexes [I ≥ 2σ (I)]                | R <sub>1</sub> = 0.0582, wR <sub>2</sub> = 0.1438             |
| Final R indexes [all data]                  | R <sub>1</sub> = 0.0603, wR <sub>2</sub> = 0.1464             |
| Largest diff. peak/hole / e Å <sup>-3</sup> | 0.72/-0.24                                                    |
| Flack parameter                             | 0.0(5)                                                        |

**Table 2 Fractional Atomic Coordinates ( $\times 10^4$ ) and Equivalent Isotropic Displacement Parameters ( $\text{\AA}^2 \times 10^3$ ) for xstr0016.  $U_{eq}$  is defined as 1/3 of the trace of the orthogonalised  $U_{ij}$  tensor.**

| Atom | x       | y       | z        | U(eq)    |
|------|---------|---------|----------|----------|
| O1   | 2942(2) | 4770(4) | 4164(5)  | 63.7(12) |
| N1   | 3720(2) | 3180(4) | 3975(5)  | 44(1)    |
| C1   | 3522(2) | 4324(4) | 3796(5)  | 36.5(10) |
| C2   | 4126(3) | 4927(4) | 3051(7)  | 48.3(13) |
| C3   | 4818(3) | 4092(4) | 3305(6)  | 43.2(11) |
| C4   | 5445(2) | 4183(4) | 2349(4)  | 30.9(9)  |
| C5   | 5745(3) | 5306(4) | 2217(5)  | 34.1(9)  |
| C6   | 6386(3) | 5511(4) | 1533(5)  | 40.2(11) |
| C7   | 6733(2) | 4549(5) | 979(5)   | 39.5(11) |
| C8   | 6447(2) | 3416(4) | 1110(5)  | 32.3(9)  |
| C9   | 5806(2) | 3204(4) | 1796(4)  | 28.7(8)  |
| C10  | 5549(2) | 1919(4) | 1971(5)  | 29.2(9)  |
| C11  | 5631(2) | 1648(3) | 3611(5)  | 29.6(9)  |
| C12  | 5027(2) | 2080(4) | 4295(5)  | 32.5(9)  |
| C13  | 4391(3) | 2840(4) | 3302(5)  | 38.2(11) |
| C14  | 4090(2) | 2261(4) | 1761(5)  | 36.7(10) |
| C15  | 4685(2) | 1749(4) | 1117(5)  | 33.0(9)  |
| C16  | 4475(3) | 1187(4) | -258(5)  | 39.1(10) |
| C17  | 3665(3) | 1153(5) | -1022(6) | 50.3(13) |
| C18  | 3083(3) | 1723(6) | -404(7)  | 55.7(15) |
| C19  | 3299(3) | 2257(5) | 997(6)   | 47.9(13) |
| C20  | 6310(2) | 1073(4) | 4487(5)  | 32.0(9)  |
| C21  | 6372(3) | 898(4)  | 6005(5)  | 39(1)    |
| C22  | 5766(3) | 1315(4) | 6674(6)  | 41.3(11) |
| C23  | 5101(3) | 1905(4) | 5824(5)  | 38.4(10) |
| C24  | 3192(3) | 2318(5) | 4465(7)  | 55.2(14) |

**Table 3 Anisotropic Displacement Parameters ( $\text{\AA}^2 \times 10^3$ ) for xstr0016. The Anisotropic displacement factor exponent takes the form:  $-2\pi^2[h^2a^{*2}U_{11}+2hka^*b^*U_{12}+\dots]$ .**

| Atom | $U_{11}$ | $U_{22}$ | $U_{33}$ | $U_{23}$ | $U_{13}$ | $U_{12}$ |
|------|----------|----------|----------|----------|----------|----------|
| O1   | 39(2)    | 70(2)    | 91(3)    | -27(2)   | 34(2)    | 8.6(17)  |
| N1   | 36(2)    | 46(2)    | 62(3)    | 7.1(19)  | 34(2)    | 11.6(17) |
| C1   | 25.2(19) | 50(2)    | 33(2)    | -13(2)   | 4.9(17)  | 6.2(18)  |
| C2   | 36(2)    | 42(3)    | 74(4)    | -4(3)    | 25(3)    | 5(2)     |
| C3   | 42(2)    | 41(2)    | 51(3)    | 3(2)     | 20(2)    | 1(2)     |
| C4   | 30(2)    | 41(2)    | 23.2(19) | 6.5(17)  | 10.9(16) | 0.9(17)  |
| C5   | 36(2)    | 37(2)    | 30(2)    | 4.6(17)  | 7.3(18)  | 2.7(17)  |
| C6   | 34(2)    | 42(2)    | 43(3)    | 15(2)    | 5(2)     | -7.3(18) |
| C7   | 26(2)    | 57(3)    | 37(2)    | 11(2)    | 11.6(18) | -3.0(19) |
| C8   | 21.9(18) | 51(2)    | 26(2)    | 4.2(18)  | 9.1(15)  | 2.7(17)  |
| C9   | 21.6(18) | 43(2)    | 22.7(19) | 4.2(17)  | 7.2(15)  | -0.7(16) |
| C10  | 21.7(18) | 34.4(19) | 35(2)    | 1.4(17)  | 14.3(16) | 4.8(14)  |
| C11  | 26.1(19) | 27.5(18) | 40(2)    | -2.2(17) | 17.3(17) | -2.6(15) |
| C12  | 27.8(19) | 30.7(19) | 45(2)    | -4.7(18) | 21.1(18) | -4.4(16) |
| C13  | 33(2)    | 39(2)    | 54(3)    | 10(2)    | 32(2)    | 9.8(18)  |
| C14  | 29(2)    | 41(2)    | 45(3)    | 13(2)    | 18.6(19) | 8.4(17)  |
| C15  | 26.2(19) | 33(2)    | 43(3)    | 9.4(18)  | 14.4(18) | 3.0(15)  |
| C16  | 35(2)    | 45(2)    | 41(3)    | 4(2)     | 15(2)    | -1.9(18) |
| C17  | 40(3)    | 68(3)    | 39(3)    | 15(2)    | 2(2)     | -9(2)    |
| C18  | 26(2)    | 79(4)    | 60(4)    | 27(3)    | 6(2)     | 2(2)     |
| C19  | 30(2)    | 70(3)    | 48(3)    | 20(3)    | 16(2)    | 8(2)     |
| C20  | 27.4(19) | 30.0(19) | 40(2)    | -0.1(18) | 9.5(17)  | -2.5(16) |
| C21  | 37(2)    | 38(2)    | 41(3)    | 1(2)     | 3.9(19)  | -9.4(19) |
| C22  | 51(3)    | 42(2)    | 33(2)    | -2(2)    | 14(2)    | -11(2)   |
| C23  | 42(2)    | 37(2)    | 42(3)    | -6(2)    | 24(2)    | -8.8(18) |
| C24  | 43(3)    | 60(3)    | 76(4)    | 6(3)     | 42(3)    | 1(2)     |

**Table 4 Bond Lengths for xstr0016.**

| Atom | Atom | Length/Å | Atom | Atom | Length/Å |
|------|------|----------|------|------|----------|
| O1   | C1   | 1.220(5) | C10  | C15  | 1.506(6) |
| N1   | C1   | 1.329(6) | C11  | C12  | 1.405(5) |
| N1   | C13  | 1.464(5) | C11  | C20  | 1.401(6) |
| N1   | C24  | 1.457(6) | C12  | C13  | 1.506(6) |
| C1   | C2   | 1.515(7) | C12  | C23  | 1.393(7) |
| C2   | C3   | 1.478(7) | C13  | C14  | 1.533(7) |
| C3   | C4   | 1.528(6) | C14  | C15  | 1.403(6) |
| C3   | C13  | 1.582(6) | C14  | C19  | 1.363(7) |
| C4   | C5   | 1.376(6) | C15  | C16  | 1.382(7) |
| C4   | C9   | 1.408(6) | C16  | C17  | 1.390(7) |
| C5   | C6   | 1.394(6) | C17  | C18  | 1.401(8) |
| C6   | C7   | 1.382(7) | C18  | C19  | 1.388(9) |
| C7   | C8   | 1.377(7) | C20  | C21  | 1.386(6) |
| C8   | C9   | 1.397(5) | C21  | C22  | 1.393(7) |
| C9   | C10  | 1.526(6) | C22  | C23  | 1.383(7) |
| C10  | C11  | 1.510(6) |      |      |          |

**Table 5 Bond Angles for xstr0016.**

| <b>Atom</b> | <b>Atom</b> | <b>Atom</b> | <b>Angle/°</b> | <b>Atom</b> | <b>Atom</b> | <b>Atom</b> | <b>Angle/°</b> |
|-------------|-------------|-------------|----------------|-------------|-------------|-------------|----------------|
| C1          | N1          | C13         | 113.5(4)       | C20         | C11         | C12         | 119.3(4)       |
| C1          | N1          | C24         | 121.7(4)       | C11         | C12         | C13         | 114.8(4)       |
| C24         | N1          | C13         | 123.3(4)       | C23         | C12         | C11         | 119.6(4)       |
| O1          | C1          | N1          | 124.0(5)       | C23         | C12         | C13         | 125.1(4)       |
| O1          | C1          | C2          | 127.8(5)       | N1          | C13         | C3          | 99.6(3)        |
| N1          | C1          | C2          | 108.1(3)       | N1          | C13         | C12         | 114.2(4)       |
| C3          | C2          | C1          | 103.8(4)       | N1          | C13         | C14         | 112.0(4)       |
| C2          | C3          | C4          | 119.9(4)       | C12         | C13         | C3          | 103.8(4)       |
| C2          | C3          | C13         | 102.5(4)       | C12         | C13         | C14         | 110.9(3)       |
| C4          | C3          | C13         | 115.9(4)       | C14         | C13         | C3          | 115.7(4)       |
| C5          | C4          | C3          | 115.6(4)       | C15         | C14         | C13         | 116.3(4)       |
| C5          | C4          | C9          | 118.9(4)       | C19         | C14         | C13         | 123.7(4)       |
| C9          | C4          | C3          | 124.8(4)       | C19         | C14         | C15         | 119.9(5)       |
| C4          | C5          | C6          | 122.3(4)       | C14         | C15         | C10         | 115.9(4)       |
| C7          | C6          | C5          | 118.6(4)       | C16         | C15         | C10         | 123.2(4)       |
| C8          | C7          | C6          | 120.1(4)       | C16         | C15         | C14         | 120.8(4)       |
| C7          | C8          | C9          | 121.6(4)       | C15         | C16         | C17         | 119.4(5)       |
| C4          | C9          | C10         | 122.9(3)       | C16         | C17         | C18         | 119.3(5)       |
| C8          | C9          | C4          | 118.5(4)       | C19         | C18         | C17         | 120.8(5)       |
| C8          | C9          | C10         | 118.6(4)       | C14         | C19         | C18         | 119.7(5)       |
| C11         | C10         | C9          | 109.4(3)       | C21         | C20         | C11         | 120.2(4)       |
| C15         | C10         | C9          | 109.4(3)       | C20         | C21         | C22         | 120.2(4)       |
| C15         | C10         | C11         | 110.4(3)       | C23         | C22         | C21         | 120.0(4)       |
| C12         | C11         | C10         | 117.8(4)       | C22         | C23         | C12         | 120.6(4)       |
| C20         | C11         | C10         | 122.7(4)       |             |             |             |                |

**Table 6 Torsion Angles for xstr0016.**

| A   | B   | C   | D   | Angle/°   | A   | B   | C   | D   | Angle/°   |
|-----|-----|-----|-----|-----------|-----|-----|-----|-----|-----------|
| O1  | C1  | C2  | C3  | 162.7(5)  | C10 | C15 | C16 | C17 | -174.9(4) |
| N1  | C1  | C2  | C3  | -18.3(6)  | C11 | C10 | C15 | C14 | 46.8(5)   |
| N1  | C13 | C14 | C15 | -171.1(4) | C11 | C10 | C15 | C16 | -136.8(4) |
| N1  | C13 | C14 | C19 | 10.9(6)   | C11 | C12 | C13 | N1  | 173.9(4)  |
| C1  | N1  | C13 | C3  | 24.4(5)   | C11 | C12 | C13 | C3  | -78.7(4)  |
| C1  | N1  | C13 | C12 | 134.4(4)  | C11 | C12 | C13 | C14 | 46.2(5)   |
| C1  | N1  | C13 | C14 | -98.5(5)  | C11 | C12 | C23 | C22 | 0.3(6)    |
| C1  | C2  | C3  | C4  | 161.9(4)  | C11 | C20 | C21 | C22 | -1.3(6)   |
| C1  | C2  | C3  | C13 | 31.8(5)   | C12 | C11 | C20 | C21 | 2.1(6)    |
| C2  | C3  | C4  | C5  | 48.9(6)   | C12 | C13 | C14 | C15 | -42.2(5)  |
| C2  | C3  | C4  | C9  | -140.5(5) | C12 | C13 | C14 | C19 | 139.8(4)  |
| C2  | C3  | C13 | N1  | -33.7(5)  | C13 | N1  | C1  | O1  | 174.0(5)  |
| C2  | C3  | C13 | C12 | -151.7(4) | C13 | N1  | C1  | C2  | -5.1(6)   |
| C2  | C3  | C13 | C14 | 86.5(5)   | C13 | C3  | C4  | C5  | 172.8(4)  |
| C3  | C4  | C5  | C6  | 172.3(4)  | C13 | C3  | C4  | C9  | -16.6(6)  |
| C3  | C4  | C9  | C8  | -171.4(4) | C13 | C12 | C23 | C22 | -171.7(4) |
| C3  | C4  | C9  | C10 | 6.0(6)    | C13 | C14 | C15 | C10 | -4.6(5)   |
| C3  | C13 | C14 | C15 | 75.7(5)   | C13 | C14 | C15 | C16 | 178.9(4)  |
| C3  | C13 | C14 | C19 | -102.3(5) | C13 | C14 | C19 | C18 | 179.2(4)  |
| C4  | C3  | C13 | N1  | -166.2(4) | C14 | C15 | C16 | C17 | 1.4(7)    |
| C4  | C3  | C13 | C12 | 75.8(5)   | C15 | C10 | C11 | C12 | -42.8(5)  |
| C4  | C3  | C13 | C14 | -46.0(5)  | C15 | C10 | C11 | C20 | 142.3(4)  |
| C4  | C5  | C6  | C7  | -0.4(7)   | C15 | C14 | C19 | C18 | 1.3(8)    |
| C4  | C9  | C10 | C11 | -56.8(5)  | C15 | C16 | C17 | C18 | 2.0(7)    |
| C4  | C9  | C10 | C15 | 64.2(5)   | C16 | C17 | C18 | C19 | -3.8(8)   |
| C5  | C4  | C9  | C8  | -1.1(6)   | C17 | C18 | C19 | C14 | 2.1(8)    |
| C5  | C4  | C9  | C10 | 176.3(4)  | C19 | C14 | C15 | C10 | 173.4(4)  |
| C5  | C6  | C7  | C8  | -0.2(7)   | C19 | C14 | C15 | C16 | -3.1(7)   |
| C6  | C7  | C8  | C9  | 0.1(6)    | C20 | C11 | C12 | C13 | 171.2(4)  |
| C7  | C8  | C9  | C4  | 0.5(6)    | C20 | C11 | C12 | C23 | -1.6(6)   |
| C7  | C8  | C9  | C10 | -177.0(4) | C20 | C21 | C22 | C23 | 0.0(6)    |
| C8  | C9  | C10 | C11 | 120.6(4)  | C21 | C22 | C23 | C12 | 0.5(6)    |
| C8  | C9  | C10 | C15 | -118.4(4) | C23 | C12 | C13 | N1  | -13.8(6)  |
| C9  | C4  | C5  | C6  | 1.1(6)    | C23 | C12 | C13 | C3  | 93.7(5)   |
| C9  | C10 | C11 | C12 | 77.5(4)   | C23 | C12 | C13 | C14 | -141.4(4) |
| C9  | C10 | C11 | C20 | -97.3(4)  | C24 | N1  | C1  | O1  | 7.9(8)    |
| C9  | C10 | C15 | C14 | -73.7(4)  | C24 | N1  | C1  | C2  | -171.1(5) |
| C9  | C10 | C15 | C16 | 102.7(5)  | C24 | N1  | C13 | C3  | -169.9(5) |
| C10 | C11 | C12 | C13 | -3.8(5)   | C24 | N1  | C13 | C12 | -59.9(7)  |
| C10 | C11 | C12 | C23 | -176.6(4) | C24 | N1  | C13 | C14 | 67.3(6)   |
| C10 | C11 | C20 | C21 | 176.8(4)  |     |     |     |     |           |

**Table 7 Hydrogen Atom Coordinates ( $\text{\AA}\times 10^4$ ) and Isotropic Displacement Parameters ( $\text{\AA}^2\times 10^3$ ) for xstr0016.**

| <b>Atom</b> | <b>x</b> | <b>y</b> | <b>z</b> | <b>U(eq)</b> |
|-------------|----------|----------|----------|--------------|
| H2A         | 3895     | 5042     | 1967     | 58           |
| H2B         | 4293     | 5710     | 3516     | 58           |
| H3          | 5124     | 4228     | 4362     | 52           |
| H5          | 5507     | 5964     | 2606     | 41           |
| H6          | 6581     | 6295     | 1449     | 48           |
| H7          | 7170     | 4670     | 506      | 47           |
| H8          | 6692     | 2763     | 726      | 39           |
| H10         | 5909     | 1371     | 1557     | 35           |
| H16         | 4879     | 827      | -676     | 47           |
| H17         | 3509     | 749      | -1953    | 60           |
| H18         | 2534     | 1744     | -949     | 67           |
| H19         | 2897     | 2618     | 1421     | 57           |
| H20         | 6730     | 801      | 4040     | 38           |
| H21         | 6828     | 494      | 6590     | 47           |
| H22         | 5810     | 1195     | 7715     | 50           |
| H23         | 4692     | 2193     | 6287     | 46           |
| H24A        | 3183     | 2475     | 5512     | 83           |
| H24B        | 3397     | 1512     | 4376     | 83           |
| H24C        | 2642     | 2389     | 3837     | 83           |



## Experimental

Single crystals of C<sub>24</sub>H<sub>19</sub>NO [xstr0016] were []. A suitable crystal was selected and [Nylon Loop] on a SuperNova, Dual, Cu at zero, Atlas diffractometer. The crystal was kept at 150 K during data collection. Using Olex2 [1], the structure was solved with the Superflip [2] structure solution program using Charge Flipping and refined with the ShelXL [3] refinement package using Least Squares minimisation.

1. Dolomanov, O.V., Bourhis, L.J., Gildea, R.J, Howard, J.A.K. & Puschmann, H. (2009), J. Appl. Cryst. 42, 339-341.
2. Palatinus, L. & Chapuis, G. (2007). J. Appl. Cryst., 40, 786-790; Palatinus, L. & van der Lee, A. (2008). J. Appl. Cryst. 41, 975-984; Palatinus, L., Prathapa, S. J. & van Smaalen, S. (2012). J. Appl. Cryst. 45, 575-580
3. Sheldrick, G.M. (2008). Acta Cryst. A64, 112-122

## Crystal structure determination of [xstr0016]

**Crystal Data** for C<sub>24</sub>H<sub>19</sub>NO (*M*=337.40): monoclinic, space group Cc (no. 9), *a* = 16.9504(14) Å, *b* = 11.2305(10) Å, *c* = 9.1731(9) Å, *β* = 103.305(10)°, *V* = 1699.3(3) Å<sup>3</sup>, *Z* = 4, *T* = 150 K, *μ*(CuKα) = 0.623 mm<sup>-1</sup>, *D*<sub>calc</sub> = 1.319 g/mm<sup>3</sup>, 2772 reflections measured (9.528 ≤ 2θ ≤ 149.326), 1846 unique (*R*<sub>int</sub> = 0.0370, *R*<sub>sigma</sub> = 0.0415) which were used in all calculations. The final *R*<sub>1</sub> was 0.0582 (*I* > 2σ(*I*)) and *wR*<sub>2</sub> was 0.1464 (all data).

## Refinement model description

Number of restraints - 2, number of constraints - unknown.

Details:

1. Fixed Uiso

At 1.2 times of:

All C(H) groups, All C(H,H) groups

At 1.5 times of:

All C(H,H,H) groups

2.a Ternary CH refined with riding coordinates:

C3(H3), C10(H10)

2.b Secondary CH<sub>2</sub> refined with riding coordinates:

C2(H2A,H2B)

2.c Aromatic/amide H refined with riding coordinates:

C5(H5), C6(H6), C7(H7), C8(H8), C16(H16), C17(H17), C18(H18), C19(H19), C20(H20), C21(H21), C22(H22), C23(H23)

2.d Idealised Me refined as rotating group:

C24(H24A,H24B,H24C)

This report has been created with Olex2, compiled on 2013.12.10 svn.r2850 for OlexSys.

**Table 7** Crystal data and structure refinement for **9**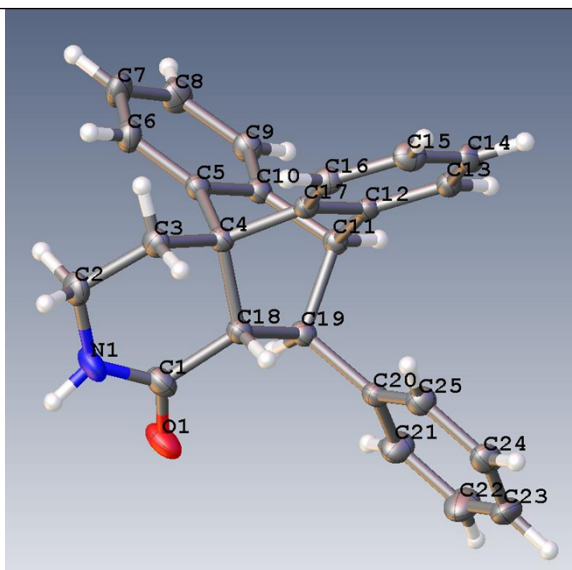

|                                             |                                                               |
|---------------------------------------------|---------------------------------------------------------------|
| Identification code                         | xstr0122                                                      |
| Empirical formula                           | C <sub>28.5</sub> H <sub>21</sub> NO                          |
| Formula weight                              | 393.46                                                        |
| Temperature/K                               | 150                                                           |
| Crystal system                              | triclinic                                                     |
| Space group                                 | P-1                                                           |
| a/Å                                         | 8.9866(3)                                                     |
| b/Å                                         | 9.1620(3)                                                     |
| c/Å                                         | 13.9462(5)                                                    |
| $\alpha$ /°                                 | 93.732(3)                                                     |
| $\beta$ /°                                  | 95.624(3)                                                     |
| $\gamma$ /°                                 | 115.839(4)                                                    |
| Volume/Å <sup>3</sup>                       | 1021.00(7)                                                    |
| Z                                           | 2                                                             |
| $\rho_{\text{calc}}$ /mm <sup>3</sup>       | 1.280                                                         |
| m/mm <sup>-1</sup>                          | 0.598                                                         |
| F(000)                                      | 414.0                                                         |
| Crystal size/mm <sup>3</sup>                | 0.28 × 0.26 × 0.08                                            |
| Radiation                                   | CuK $\alpha$ ( $\lambda$ = 1.54184)                           |
| 2 $\theta$ range for data collection        | 10.808 to 148.288°                                            |
| Index ranges                                | -11 ≤ h ≤ 11, -11 ≤ k ≤ 11, -16 ≤ l ≤ 17                      |
| Reflections collected                       | 15762                                                         |
| Independent reflections                     | 4024 [R <sub>int</sub> = 0.0305, R <sub>sigma</sub> = 0.0228] |
| Data/restraints/parameters                  | 4024/0/276                                                    |
| Goodness-of-fit on F <sup>2</sup>           | 1.044                                                         |
| Final R indexes [I >= 2 $\sigma$ (I)]       | R <sub>1</sub> = 0.0584, wR <sub>2</sub> = 0.1567             |
| Final R indexes [all data]                  | R <sub>1</sub> = 0.0627, wR <sub>2</sub> = 0.1614             |
| Largest diff. peak/hole / e Å <sup>-3</sup> | 0.62/-0.57                                                    |

**Table 8 Fractional Atomic Coordinates ( $\times 10^4$ ) and Equivalent Isotropic Displacement Parameters ( $\text{\AA}^2 \times 10^3$ ) for xstr0122.  $U_{eq}$  is defined as 1/3 of the trace of the orthogonalised  $U_{ij}$  tensor.**

| Atom | <i>x</i>   | <i>y</i>   | <i>z</i>   | U(eq)    |
|------|------------|------------|------------|----------|
| O1   | 5113(2)    | 305.3(18)  | 3742.3(10) | 38.7(4)  |
| N1   | 3990(2)    | 1431(2)    | 4756.7(11) | 33.8(4)  |
| C1   | 4460(2)    | 1224(2)    | 3892.5(13) | 28.4(4)  |
| C2   | 2944(2)    | 2225(2)    | 4970.6(13) | 29.7(4)  |
| C3   | 2919(2)    | 3395(2)    | 4247.9(12) | 24.2(4)  |
| C4   | 2822.5(19) | 2740.1(19) | 3197.7(11) | 19.8(3)  |
| C5   | 1203(2)    | 1248.6(19) | 2767.7(12) | 20.7(3)  |
| C6   | -243(2)    | 540(2)     | 3187.8(13) | 27.2(4)  |
| C7   | -1641(2)   | -782(2)    | 2675.0(14) | 31.7(4)  |
| C8   | -1583(2)   | -1414(2)   | 1761.8(14) | 29.1(4)  |
| C9   | -140(2)    | -693(2)    | 1324.6(13) | 24.5(4)  |
| C10  | 1233(2)    | 659.4(19)  | 1818.0(12) | 20.2(3)  |
| C11  | 2825.7(19) | 1664.7(19) | 1417.0(11) | 18.9(3)  |
| C12  | 3105.3(18) | 3423.7(19) | 1536.0(11) | 17.7(3)  |
| C13  | 3409.7(19) | 4449(2)    | 817.9(12)  | 21.3(3)  |
| C14  | 3704(2)    | 6067(2)    | 1044.7(13) | 25.7(4)  |
| C15  | 3691(2)    | 6640(2)    | 1986.7(14) | 27.2(4)  |
| C16  | 3385(2)    | 5608(2)    | 2714.6(13) | 23.4(4)  |
| C17  | 3095.4(18) | 4003.2(19) | 2490.5(11) | 18.4(3)  |
| C18  | 4304(2)    | 2283(2)    | 3129.5(11) | 20.5(3)  |
| C19  | 4266(2)    | 1550.9(19) | 2087.9(12) | 19.8(3)  |
| C20  | 5920(2)    | 2313(2)    | 1692.3(12) | 21.2(3)  |
| C21  | 6487(2)    | 1294(2)    | 1236.8(15) | 31.2(4)  |
| C22  | 7992(3)    | 1929(3)    | 871.7(17)  | 40.0(5)  |
| C23  | 8969(2)    | 3601(3)    | 947.8(15)  | 35.2(5)  |
| C24  | 8412(2)    | 4631(2)    | 1381.1(14) | 30.0(4)  |
| C25  | 6896(2)    | 3994(2)    | 1751.1(13) | 25.8(4)  |
| C31  | 947(5)     | 5808(6)    | 5747(3)    | 38.9(10) |
| C32  | 37(7)      | 5807(6)    | 4079(4)    | 58.8(12) |
| C33  | 1140(9)    | 6689(9)    | 5012(6)    | 79.6(17) |
| C34  | 1118(13)   | 7333(12)   | 4399(8)    | 62(2)    |
| C41  | 459(9)     | 5958(8)    | 4534(6)    | 46.3(14) |
| C42  | 1349(10)   | 6776(10)   | 5470(7)    | 56.5(18) |
| C43  | 699(9)     | 5416(9)    | 5984(5)    | 43.4(17) |
| C44  | 608(14)    | 6989(13)   | 3556(8)    | 40(2)    |

**Table 9 Anisotropic Displacement Parameters ( $\text{\AA}^2 \times 10^3$ ) for xstr0122. The Anisotropic displacement factor exponent takes the form:  $-2\pi^2[h^2a^{*2}U_{11}+2hka^*b^*U_{12}+\dots]$ .**

| Atom | $U_{11}$ | $U_{22}$ | $U_{33}$ | $U_{23}$ | $U_{13}$ | $U_{12}$ |
|------|----------|----------|----------|----------|----------|----------|
| O1   | 56.1(9)  | 45.8(8)  | 29.6(7)  | 11.9(6)  | 2.3(6)   | 36.5(7)  |
| N1   | 43.0(9)  | 44.5(9)  | 21.7(8)  | 14.6(7)  | 3.2(7)   | 25.4(8)  |
| C1   | 30.4(9)  | 31.3(9)  | 24.5(9)  | 7.5(7)   | -1.2(7)  | 15.1(8)  |
| C2   | 32.2(9)  | 37.5(10) | 18.8(8)  | 7.2(7)   | 4.4(7)   | 14.1(8)  |
| C3   | 23.9(8)  | 27.8(8)  | 19.3(8)  | 3.0(6)   | 1.7(6)   | 10.2(7)  |
| C4   | 19.0(7)  | 21.2(8)  | 18.8(8)  | 3.8(6)   | 1.7(6)   | 8.7(6)   |
| C5   | 19.9(8)  | 20.2(8)  | 21.2(8)  | 6.1(6)   | 1.2(6)   | 8.0(6)   |
| C6   | 25.8(9)  | 31.2(9)  | 21.5(8)  | 7.0(7)   | 5.2(7)   | 8.8(7)   |
| C7   | 22.3(8)  | 33.2(10) | 31.4(10) | 12.2(8)  | 7.3(7)   | 3.0(7)   |
| C8   | 22.5(8)  | 22.9(8)  | 31.7(9)  | 5.0(7)   | -0.1(7)  | 1.4(7)   |
| C9   | 24.5(8)  | 21.7(8)  | 23.7(8)  | 2.9(6)   | 0.8(7)   | 7.5(7)   |
| C10  | 19.4(8)  | 19.5(7)  | 22.0(8)  | 5.5(6)   | 2.0(6)   | 8.8(6)   |
| C11  | 18.3(7)  | 19.2(7)  | 17.9(7)  | 3.1(6)   | 1.3(6)   | 7.4(6)   |
| C12  | 12.8(7)  | 19.3(7)  | 20.1(8)  | 4.5(6)   | 1.2(6)   | 6.2(6)   |
| C13  | 16.7(7)  | 25.1(8)  | 21.0(8)  | 6.8(6)   | 2.8(6)   | 7.8(6)   |
| C14  | 21.2(8)  | 22.8(8)  | 31.2(9)  | 13.8(7)  | 3.9(7)   | 6.7(7)   |
| C15  | 25.5(8)  | 17.4(8)  | 37.7(10) | 5.1(7)   | 2.6(7)   | 8.7(7)   |
| C16  | 21.7(8)  | 21.9(8)  | 25.4(8)  | 1.1(6)   | 1.9(6)   | 9.2(6)   |
| C17  | 13.9(7)  | 19.7(8)  | 20.1(8)  | 3.8(6)   | 1.4(6)   | 6.1(6)   |
| C18  | 19.1(7)  | 22.1(8)  | 20.2(8)  | 5.1(6)   | 1.3(6)   | 8.8(6)   |
| C19  | 20.4(8)  | 18.2(7)  | 21.7(8)  | 4.8(6)   | 2.2(6)   | 9.4(6)   |
| C20  | 19.4(8)  | 24.4(8)  | 21.0(8)  | 6.1(6)   | 0.5(6)   | 10.9(6)  |
| C21  | 30.9(9)  | 25.9(9)  | 42.7(11) | 9.8(8)   | 11.0(8)  | 16.2(8)  |
| C22  | 41.1(11) | 42.2(11) | 53.6(13) | 16.8(10) | 21.3(10) | 29.8(10) |
| C23  | 22.4(9)  | 45.6(11) | 44.3(11) | 19.9(9)  | 11.6(8)  | 17.7(8)  |
| C24  | 21.6(8)  | 28.9(9)  | 35.1(10) | 9.6(7)   | 1.2(7)   | 7.1(7)   |
| C25  | 22.9(8)  | 25.7(8)  | 27.8(9)  | 4.4(7)   | 3.1(7)   | 9.9(7)   |

**Table 10 Bond Lengths for xstr0122.**

| Atom | Atom | Length/Å | Atom | Atom             | Length/Å  |
|------|------|----------|------|------------------|-----------|
| O1   | C1   | 1.237(2) | C15  | C16              | 1.397(2)  |
| N1   | C1   | 1.344(2) | C16  | C17              | 1.385(2)  |
| N1   | C2   | 1.458(2) | C18  | C19              | 1.551(2)  |
| C1   | C18  | 1.521(2) | C19  | C20              | 1.518(2)  |
| C2   | C3   | 1.524(2) | C20  | C21              | 1.392(2)  |
| C3   | C4   | 1.526(2) | C20  | C25              | 1.393(2)  |
| C4   | C5   | 1.528(2) | C21  | C22              | 1.384(3)  |
| C4   | C17  | 1.523(2) | C22  | C23              | 1.385(3)  |
| C4   | C18  | 1.570(2) | C23  | C24              | 1.379(3)  |
| C5   | C6   | 1.385(2) | C24  | C25              | 1.395(3)  |
| C5   | C10  | 1.405(2) | C31  | C32 <sup>1</sup> | 1.406(7)  |
| C6   | C7   | 1.393(3) | C31  | C33              | 1.324(9)  |
| C7   | C8   | 1.379(3) | C32  | C31 <sup>1</sup> | 1.407(7)  |
| C8   | C9   | 1.397(3) | C32  | C33              | 1.497(9)  |
| C9   | C10  | 1.386(2) | C32  | C34              | 1.322(11) |
| C10  | C11  | 1.511(2) | C33  | C34              | 1.073(12) |
| C11  | C12  | 1.514(2) | C41  | C42              | 1.432(11) |
| C11  | C19  | 1.567(2) | C41  | C43 <sup>1</sup> | 1.335(10) |
| C12  | C13  | 1.383(2) | C41  | C44              | 1.692(13) |
| C12  | C17  | 1.403(2) | C42  | C43              | 1.404(11) |
| C13  | C14  | 1.396(2) | C43  | C41 <sup>1</sup> | 1.335(10) |
| C14  | C15  | 1.385(3) |      |                  |           |

<sup>1</sup>-X,1-Y,1-Z

**Table 11 Bond Angles for xstr0122.**

| Atom | Atom | Atom | Angle/°    | Atom             | Atom | Atom             | Angle/°    |
|------|------|------|------------|------------------|------|------------------|------------|
| C1   | N1   | C2   | 126.58(15) | C17              | C16  | C15              | 119.59(16) |
| O1   | C1   | N1   | 121.64(16) | C12              | C17  | C4               | 113.49(13) |
| O1   | C1   | C18  | 120.73(16) | C16              | C17  | C4               | 126.58(15) |
| N1   | C1   | C18  | 117.40(15) | C16              | C17  | C12              | 119.88(15) |
| N1   | C2   | C3   | 113.37(15) | C1               | C18  | C4               | 113.82(14) |
| C2   | C3   | C4   | 113.30(14) | C1               | C18  | C19              | 112.32(13) |
| C3   | C4   | C5   | 116.09(14) | C19              | C18  | C4               | 111.74(12) |
| C3   | C4   | C18  | 108.36(13) | C18              | C19  | C11              | 107.69(12) |
| C5   | C4   | C18  | 108.00(13) | C20              | C19  | C11              | 112.12(13) |
| C17  | C4   | C3   | 113.72(13) | C20              | C19  | C18              | 114.56(13) |
| C17  | C4   | C5   | 105.85(12) | C21              | C20  | C19              | 118.91(15) |
| C17  | C4   | C18  | 104.04(12) | C21              | C20  | C25              | 117.95(16) |
| C6   | C5   | C4   | 127.07(15) | C25              | C20  | C19              | 123.13(15) |
| C6   | C5   | C10  | 119.73(15) | C22              | C21  | C20              | 121.08(17) |
| C10  | C5   | C4   | 113.05(14) | C21              | C22  | C23              | 120.58(18) |
| C5   | C6   | C7   | 119.67(16) | C24              | C23  | C22              | 119.17(17) |
| C8   | C7   | C6   | 120.57(17) | C23              | C24  | C25              | 120.35(17) |
| C7   | C8   | C9   | 120.23(16) | C20              | C25  | C24              | 120.85(17) |
| C10  | C9   | C8   | 119.39(16) | C33              | C31  | C32 <sup>1</sup> | 137.7(5)   |
| C5   | C10  | C11  | 113.75(14) | C31 <sup>1</sup> | C32  | C33              | 106.7(5)   |
| C9   | C10  | C5   | 120.28(15) | C34              | C32  | C31 <sup>1</sup> | 150.5(7)   |
| C9   | C10  | C11  | 125.93(15) | C34              | C32  | C33              | 44.2(5)    |
| C10  | C11  | C12  | 107.40(13) | C31              | C33  | C32              | 115.6(6)   |
| C10  | C11  | C19  | 106.15(12) | C34              | C33  | C31              | 172.3(9)   |
| C12  | C11  | C19  | 107.84(12) | C34              | C33  | C32              | 59.2(7)    |
| C13  | C12  | C11  | 126.22(15) | C33              | C34  | C32              | 76.6(8)    |
| C13  | C12  | C17  | 120.32(14) | C42              | C41  | C44              | 121.4(7)   |
| C17  | C12  | C11  | 113.43(13) | C43 <sup>1</sup> | C41  | C42              | 147.3(7)   |
| C12  | C13  | C14  | 119.76(15) | C43 <sup>1</sup> | C41  | C44              | 91.0(8)    |
| C15  | C14  | C13  | 119.96(15) | C43              | C42  | C41              | 97.1(6)    |
| C14  | C15  | C16  | 120.49(15) | C41 <sup>1</sup> | C43  | C42              | 115.4(7)   |

<sup>1</sup>-X,1-Y,1-Z

**Table 12** Torsion Angles for xstr0122.

| A   | B   | C   | D   | Angle/°     | A                | B   | C   | D                | Angle/°     |
|-----|-----|-----|-----|-------------|------------------|-----|-----|------------------|-------------|
| O1  | C1  | C18 | C4  | 153.95(17)  | C11              | C12 | C13 | C14              | -177.71(14) |
| O1  | C1  | C18 | C19 | 25.7(2)     | C11              | C12 | C17 | C4               | 0.56(18)    |
| N1  | C1  | C18 | C4  | -31.4(2)    | C11              | C12 | C17 | C16              | 178.11(14)  |
| N1  | C1  | C18 | C19 | -159.69(16) | C11              | C19 | C20 | C21              | -103.16(17) |
| N1  | C2  | C3  | C4  | 41.2(2)     | C11              | C19 | C20 | C25              | 75.97(19)   |
| C1  | N1  | C2  | C3  | -22.1(3)    | C12              | C11 | C19 | C18              | 53.87(16)   |
| C1  | C18 | C19 | C11 | 134.55(14)  | C12              | C11 | C19 | C20              | -73.04(16)  |
| C1  | C18 | C19 | C20 | -99.97(16)  | C12              | C13 | C14 | C15              | 0.1(2)      |
| C2  | N1  | C1  | O1  | -167.80(18) | C13              | C12 | C17 | C4               | -177.27(13) |
| C2  | N1  | C1  | C18 | 17.7(3)     | C13              | C12 | C17 | C16              | 0.3(2)      |
| C2  | C3  | C4  | C5  | 66.70(19)   | C13              | C14 | C15 | C16              | 0.0(3)      |
| C2  | C3  | C4  | C17 | -170.12(14) | C14              | C15 | C16 | C17              | 0.1(3)      |
| C2  | C3  | C4  | C18 | -54.97(18)  | C15              | C16 | C17 | C4               | 176.94(15)  |
| C3  | C4  | C5  | C6  | 7.5(2)      | C15              | C16 | C17 | C12              | -0.3(2)     |
| C3  | C4  | C5  | C10 | -176.86(13) | C17              | C4  | C5  | C6               | -119.65(18) |
| C3  | C4  | C17 | C12 | 176.38(13)  | C17              | C4  | C5  | C10              | 55.95(17)   |
| C3  | C4  | C17 | C16 | -1.0(2)     | C17              | C4  | C18 | C1               | 170.95(13)  |
| C3  | C4  | C18 | C1  | 49.63(18)   | C17              | C4  | C18 | C19              | -60.51(16)  |
| C3  | C4  | C18 | C19 | 178.17(13)  | C17              | C12 | C13 | C14              | -0.2(2)     |
| C4  | C5  | C6  | C7  | 177.21(16)  | C18              | C4  | C5  | C6               | 129.40(17)  |
| C4  | C5  | C10 | C9  | 179.84(14)  | C18              | C4  | C5  | C10              | -55.00(17)  |
| C4  | C5  | C10 | C11 | -2.30(19)   | C18              | C4  | C17 | C12              | 58.71(16)   |
| C4  | C18 | C19 | C11 | 5.22(17)    | C18              | C4  | C17 | C16              | -118.65(17) |
| C4  | C18 | C19 | C20 | 130.70(14)  | C18              | C19 | C20 | C21              | 133.71(16)  |
| C5  | C4  | C17 | C12 | -55.01(17)  | C18              | C19 | C20 | C25              | -47.2(2)    |
| C5  | C4  | C17 | C16 | 127.63(16)  | C19              | C11 | C12 | C13              | 117.50(16)  |
| C5  | C4  | C18 | C1  | -76.88(17)  | C19              | C11 | C12 | C17              | -60.18(17)  |
| C5  | C4  | C18 | C19 | 51.65(17)   | C19              | C20 | C21 | C22              | -179.46(17) |
| C5  | C6  | C7  | C8  | 1.5(3)      | C19              | C20 | C25 | C24              | 179.60(15)  |
| C5  | C10 | C11 | C12 | -52.83(17)  | C20              | C21 | C22 | C23              | -0.3(3)     |
| C5  | C10 | C11 | C19 | 62.31(16)   | C21              | C20 | C25 | C24              | -1.3(3)     |
| C6  | C5  | C10 | C9  | -4.2(2)     | C21              | C22 | C23 | C24              | -0.9(3)     |
| C6  | C5  | C10 | C11 | 173.65(15)  | C22              | C23 | C24 | C25              | 1.0(3)      |
| C6  | C7  | C8  | C9  | -2.5(3)     | C23              | C24 | C25 | C20              | 0.1(3)      |
| C7  | C8  | C9  | C10 | 0.2(3)      | C25              | C20 | C21 | C22              | 1.4(3)      |
| C8  | C9  | C10 | C5  | 3.2(2)      | C31 <sup>1</sup> | C32 | C33 | C31              | -0.4(7)     |
| C8  | C9  | C10 | C11 | -174.42(15) | C31 <sup>1</sup> | C32 | C33 | C34              | -174.0(8)   |
| C9  | C10 | C11 | C12 | 124.88(17)  | C31 <sup>1</sup> | C32 | C34 | C33              | 11.7(15)    |
| C9  | C10 | C11 | C19 | -119.97(17) | C32 <sup>1</sup> | C31 | C33 | C32              | 0.6(10)     |
| C10 | C5  | C6  | C7  | 1.9(3)      | C34              | C32 | C33 | C31              | 173.6(10)   |
| C10 | C11 | C12 | C13 | -128.49(16) | C41              | C42 | C43 | C41 <sup>1</sup> | -3.5(9)     |
| C10 | C11 | C12 | C17 | 53.84(16)   | C43 <sup>1</sup> | C41 | C42 | C43              | 5.9(14)     |
| C10 | C11 | C19 | C18 | -60.98(15)  | C44              | C41 | C42 | C43              | 176.3(7)    |
| C10 | C11 | C19 | C20 | 172.11(13)  |                  |     |     |                  |             |

**Table 13 Hydrogen Atom Coordinates ( $\text{\AA}\times 10^4$ ) and Isotropic Displacement Parameters ( $\text{\AA}^2\times 10^3$ ) for xstr0122.**

| <b>Atom</b> | <b><i>x</i></b> | <b><i>y</i></b> | <b><i>z</i></b> | <b>U(eq)</b> |
|-------------|-----------------|-----------------|-----------------|--------------|
| H1          | 4343            | 1056            | 5232            | 41           |
| H2A         | 3346            | 2824            | 5616            | 36           |
| H2B         | 1812            | 1393            | 4972            | 36           |
| H3A         | 3921            | 4422            | 4413            | 29           |
| H3B         | 1967            | 3615            | 4305            | 29           |
| H6          | -282            | 945             | 3809            | 33           |
| H7          | -2621           | -1242           | 2951            | 38           |
| H8          | -2509           | -2323           | 1436            | 35           |
| H9          | -101            | -1116           | 708             | 29           |
| H11         | 2773            | 1272            | 738             | 23           |
| H13         | 3418            | 4063            | 186             | 26           |
| H14         | 3908            | 6760            | 564             | 31           |
| H15         | 3888            | 7718            | 2136            | 33           |
| H16         | 3375            | 5997            | 3346            | 28           |
| H18         | 5328            | 3315            | 3262            | 25           |
| H19         | 3965            | 389             | 2106            | 24           |
| H21         | 5845            | 168             | 1177            | 37           |
| H22         | 8351            | 1226            | 573             | 48           |
| H23         | 9987            | 4024            | 710             | 42           |
| H24         | 9051            | 5757            | 1427            | 36           |
| H25         | 6533            | 4701            | 2041            | 31           |

**Table14 Atomic Occupancy for xstr0122.**

| <b>Atom</b> | <b><i>Occupancy</i></b> | <b>Atom</b> | <b><i>Occupancy</i></b> | <b>Atom</b> | <b><i>Occupancy</i></b> |
|-------------|-------------------------|-------------|-------------------------|-------------|-------------------------|
| C31         | 0.6                     | C32         | 0.6                     | C33         | 0.6                     |
| C34         | 0.3                     | C41         | 0.4                     | C42         | 0.4                     |
| C43         | 0.4                     | C44         | 0.2                     |             |                         |



## Experimental

Single crystals of  $C_{28.5}H_{21}NO$  [xstr0122] were crystallised from DCM/toluene. A suitable crystal was selected and [Nylon Loop] on a SuperNova, Dual, Cu at zero, Atlas diffractometer. The crystal was kept at 150 K during data collection. Using Olex2 [1], the structure was solved with the ShelXS [2] structure solution program using Direct Methods and refined with the ShelXL [3] refinement package using Least Squares minimisation.

1. Dolomanov, O.V., Bourhis, L.J., Gildea, R.J, Howard, J.A.K. & Puschmann, H. (2009), J. Appl. Cryst. 42, 339-341.
2. Sheldrick, G.M. (2008). Acta Cryst. A64, 112-122
3. Sheldrick, G.M. (2008). Acta Cryst. A64, 112-122

### Crystal structure determination of [xstr0122]

**Crystal Data** for  $C_{28.5}H_{21}NO$  ( $M=393.46$ ): triclinic, space group P-1 (no. 2),  $a = 8.9866(3)$  Å,  $b = 9.1620(3)$  Å,  $c = 13.9462(5)$  Å,  $\alpha = 93.732(3)^\circ$ ,  $\beta = 95.624(3)^\circ$ ,  $\gamma = 115.839(4)^\circ$ ,  $V = 1021.00(7)$  Å<sup>3</sup>,  $Z = 2$ ,  $T = 150$  K,  $\mu(\text{CuK}\alpha) = 0.598$  mm<sup>-1</sup>,  $D_{\text{calc}} = 1.280$  g/mm<sup>3</sup>, 15762 reflections measured ( $10.808 \leq 2\theta \leq 148.288$ ), 4024 unique ( $R_{\text{int}} = 0.0305$ ,  $R_{\text{sigma}} = 0.0228$ ) which were used in all calculations. The final  $R_1$  was 0.0584 ( $I > 2\sigma(I)$ ) and  $wR_2$  was 0.1614 (all data).

### Refinement model description

Number of restraints - 0, number of constraints - unknown.

Details:

1. Fixed Uiso

At 1.2 times of:

All C(H) groups, All C(H,H) groups, All N(H) groups

2. Others

Fixed Sof: C31(0.6) C32(0.6) C33(0.6) C34(0.3) C41(0.4) C42(0.4) C43(0.4) C44(0.2)

3.a Ternary CH refined with riding coordinates:

C11(H11), C18(H18), C19(H19)

3.b Secondary CH2 refined with riding coordinates:

C2(H2A,H2B), C3(H3A,H3B)

3.c Aromatic/amide H refined with riding coordinates:

N1(H1), C6(H6), C7(H7), C8(H8), C9(H9), C13(H13), C14(H14), C15(H15), C16(H16), C21(H21), C22(H22), C23(H23), C24(H24), C25(H25)
